# Supplementary material
Source: PubMed Central journal article supplement (PMC6467769)

**Three-Component Coupling of Aldehydes, Aminopyrazoles and Sulfoxonium Ylides via Rhodium(III)-Catalyzed Imidoyl C–H Activation: Synthesis of Pyrazolo[1,5-*a*]pyrimidines**

Gia L. Hoang, Andrew D. Streit and Jonathan A. Ellman\*

*Department of Chemistry, Yale University, New Haven, Connecticut 06520*

[jonathan.ellman@yale.edu](mailto:jonathan.ellman@yale.edu)

**SUPPORTING INFORMATION**

**Table of Contents**

|                                                                                                                               |        |
|-------------------------------------------------------------------------------------------------------------------------------|--------|
| Structures of aldehydes <b>5</b> , aminopyrazoles <b>6</b> and sulfoxonium ylides <b>7</b> .....                              | S2–S4  |
| <sup>1</sup> H and <sup>13</sup> C NMR spectra for new sulfoxonium ylides.....                                                | S5–S7  |
| <sup>1</sup> H, <sup>13</sup> C, and <sup>19</sup> F NMR spectra for <i>N</i> -fused [5,6]-bicyclic heterocycle products..... | S8–S58 |

### Structures of aldehydes

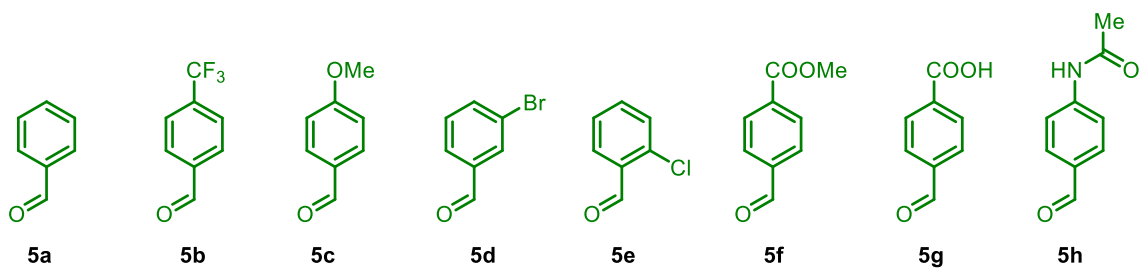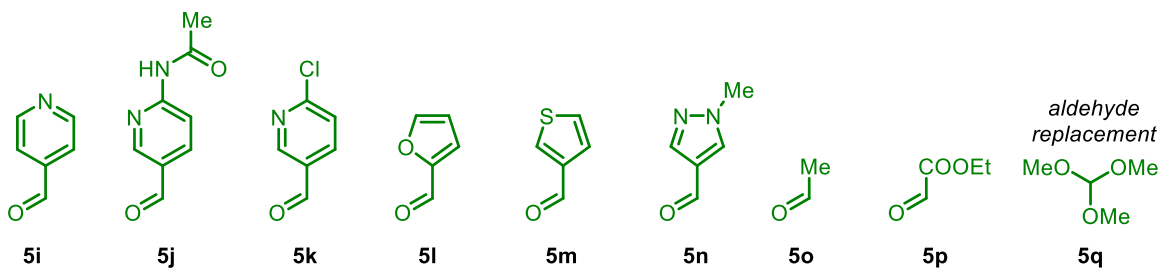

### Structures of 3-aminopyrazoles

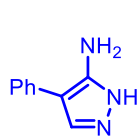

**6a**

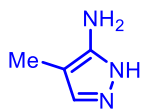

**6b**

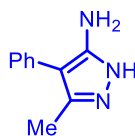

**6c**

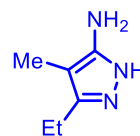

**6d**

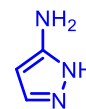

**6e**

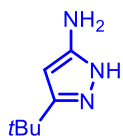

**6f**

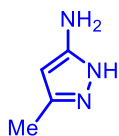

**6g**

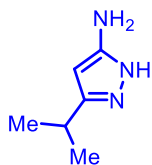

**6h**

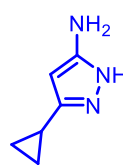

**6i**

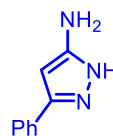

**6j**

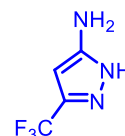

**6k**

### Structures of sulfoxonium ylides

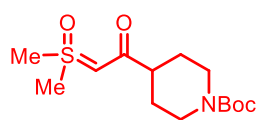

7a

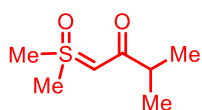

7b

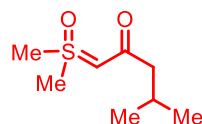

7c

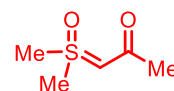

7d

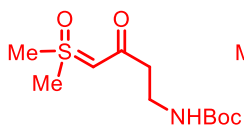

7e

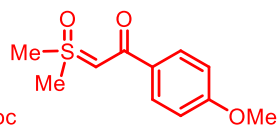

7f

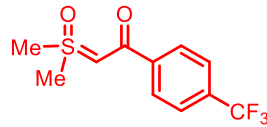

7g

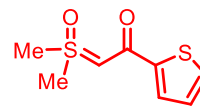

7h

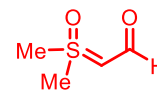

7i

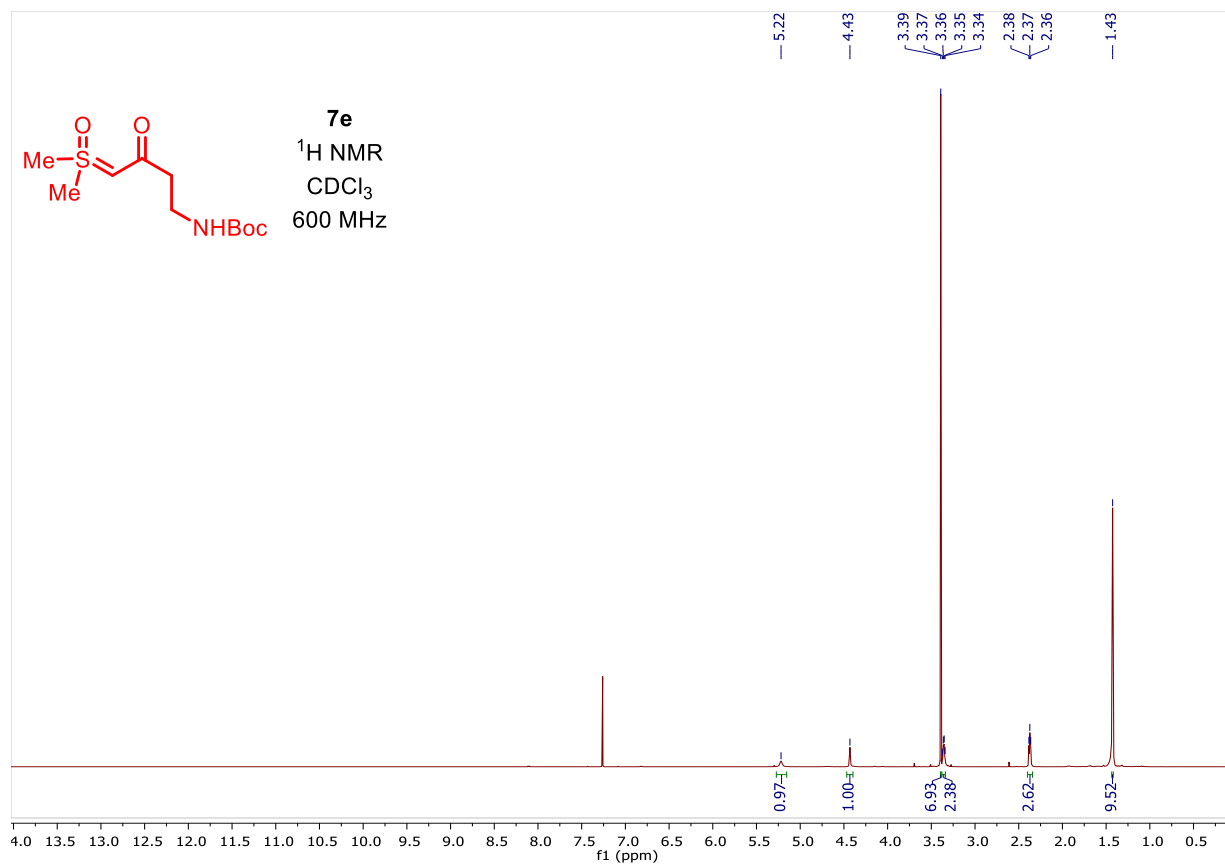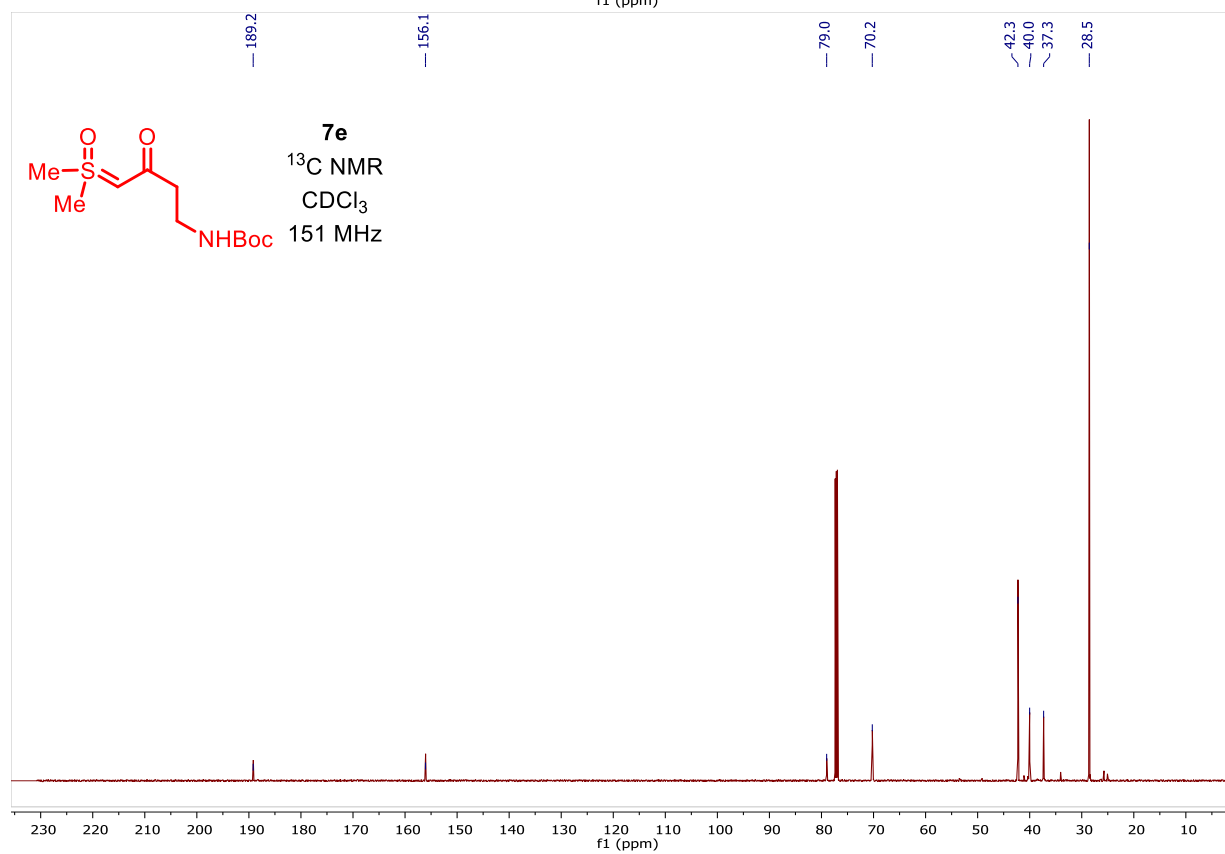

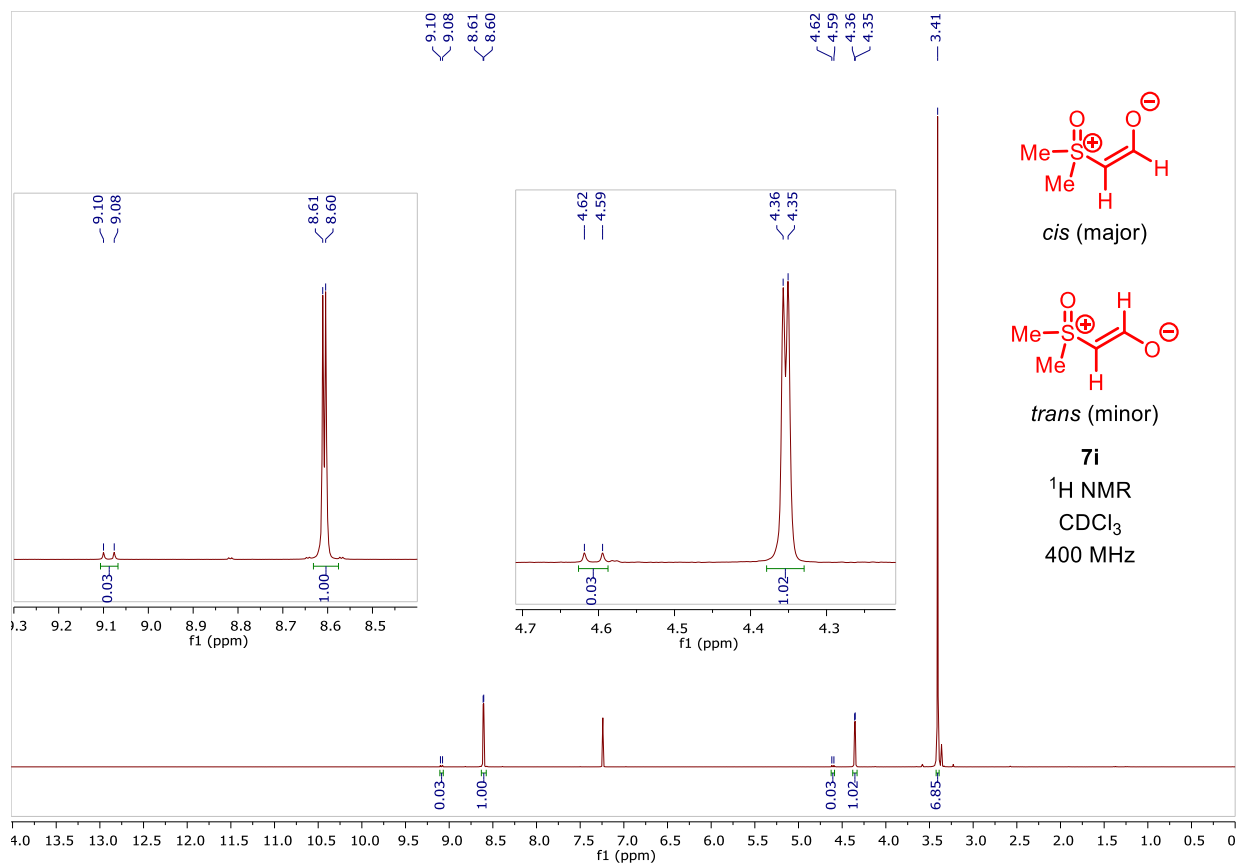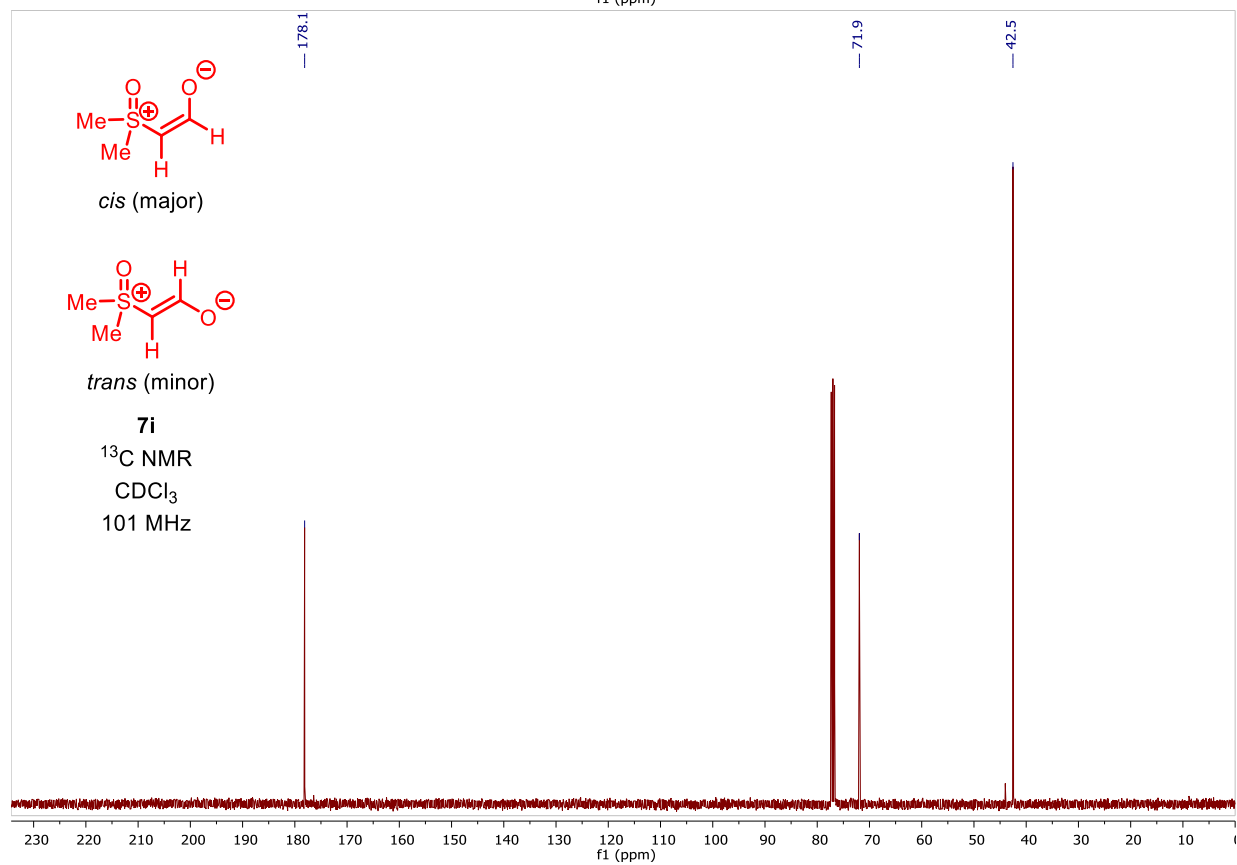

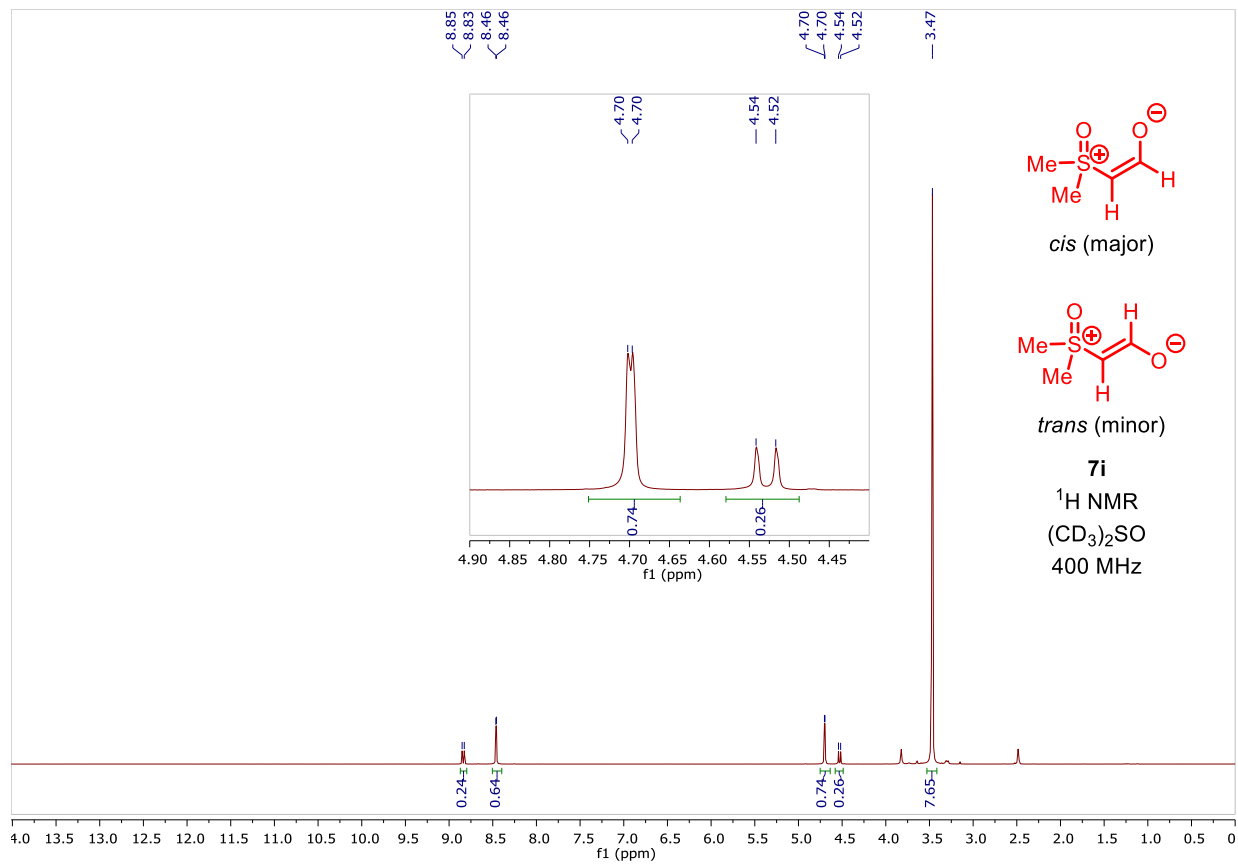

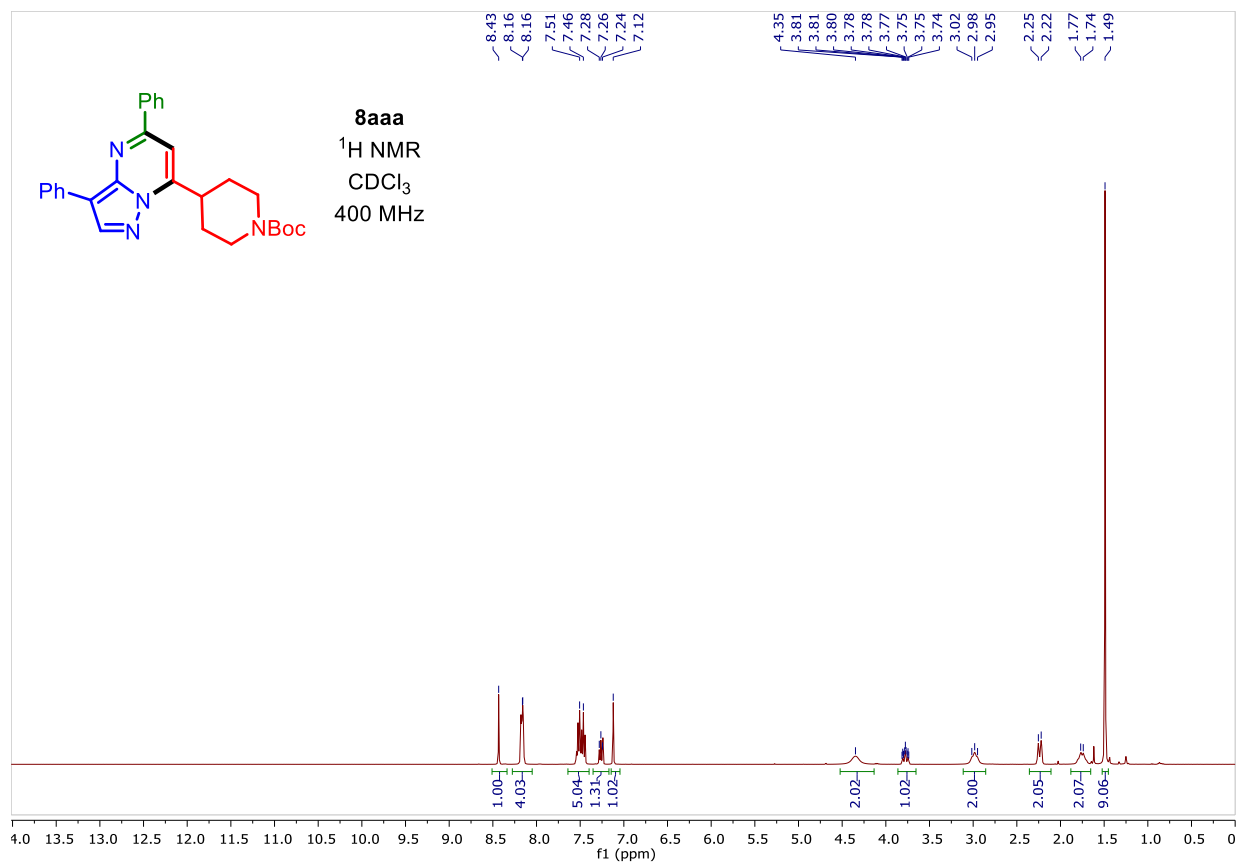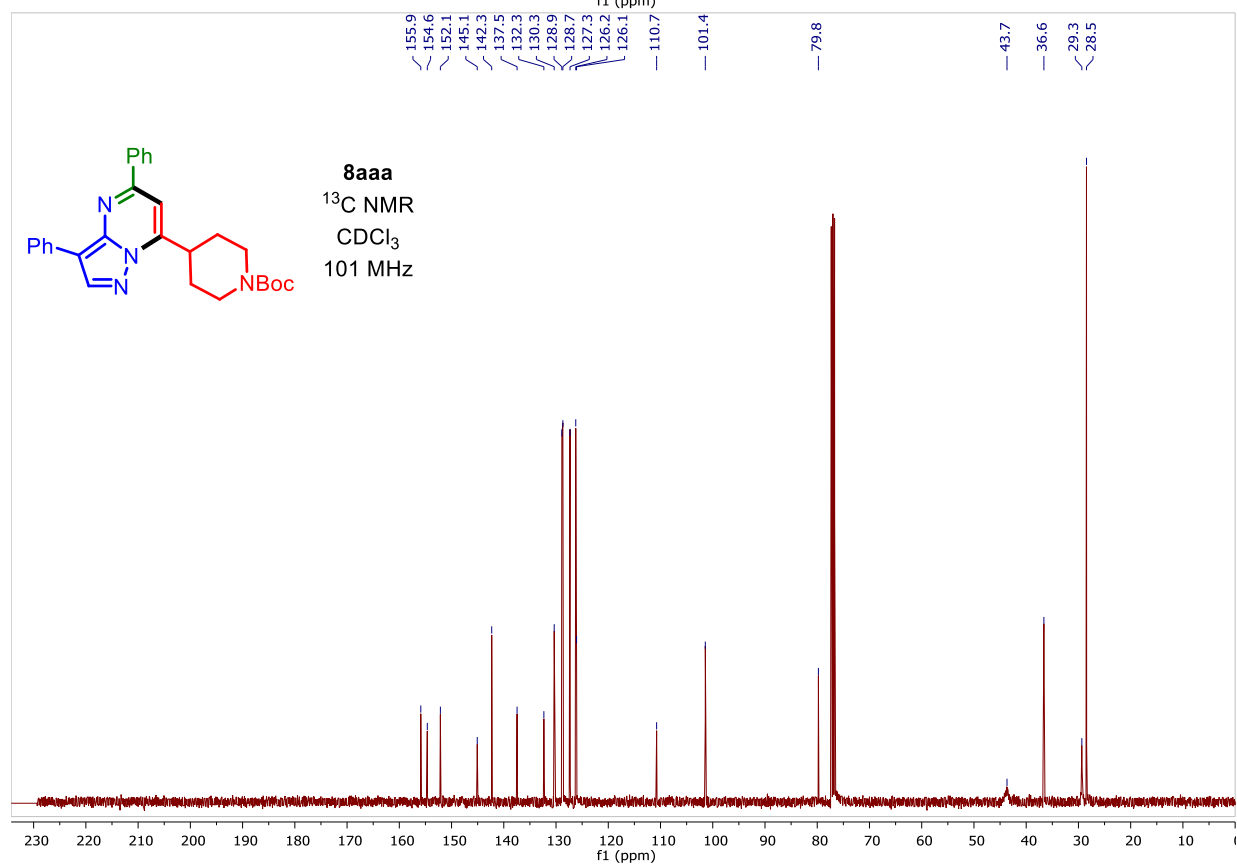





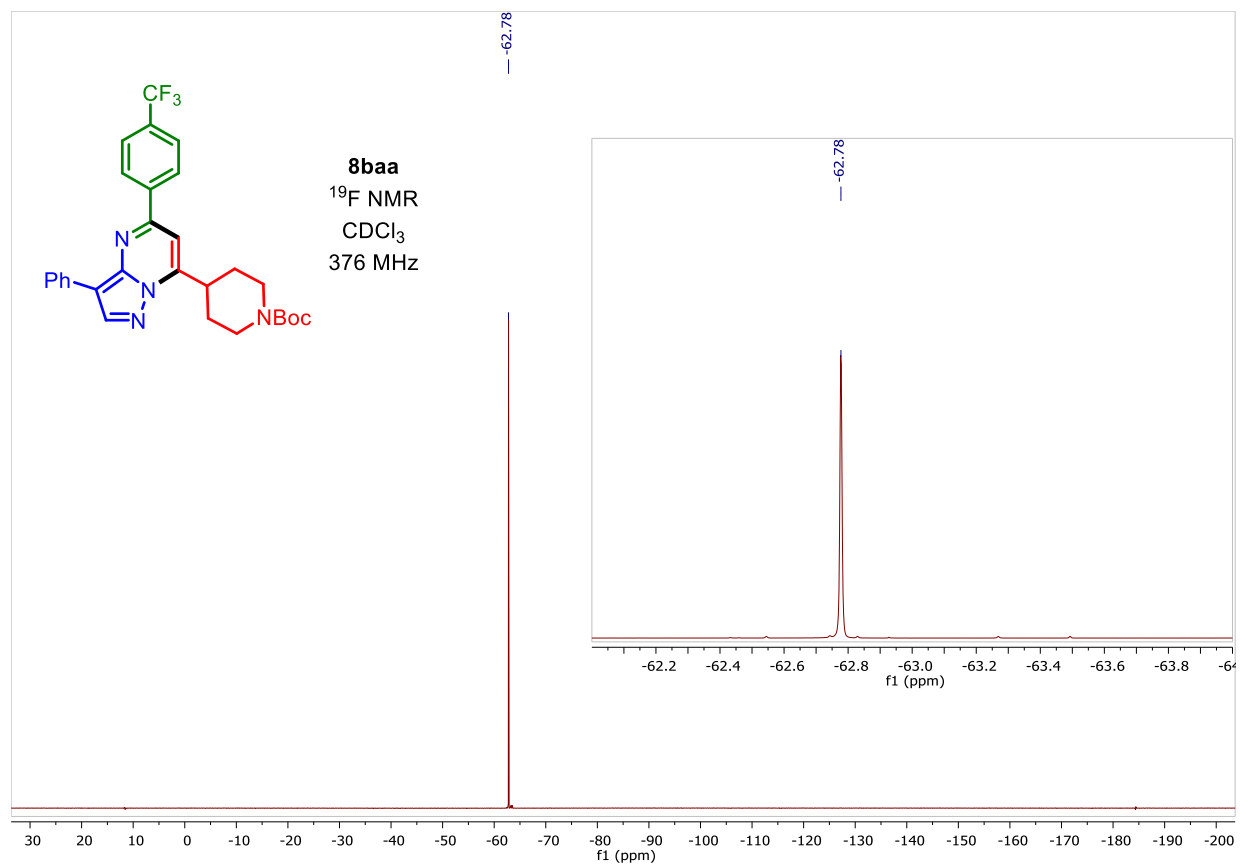

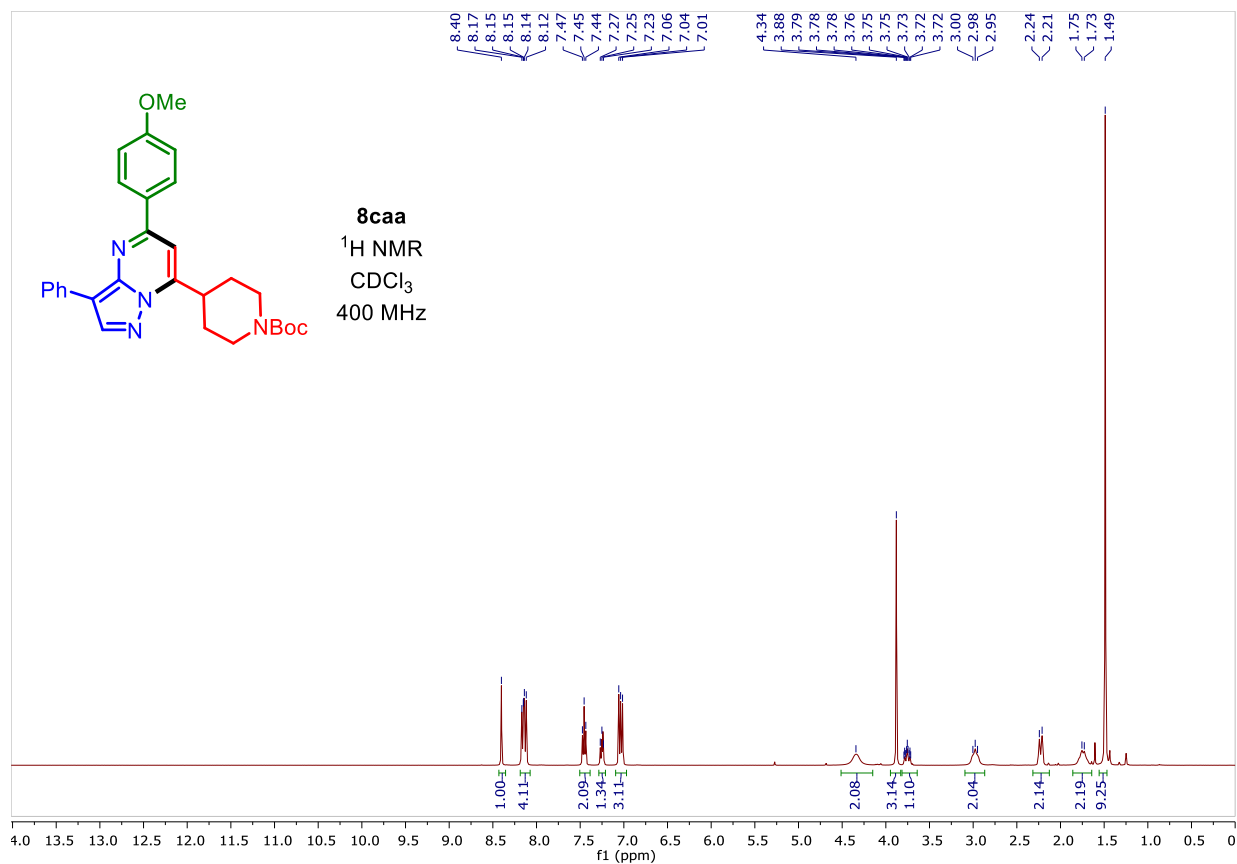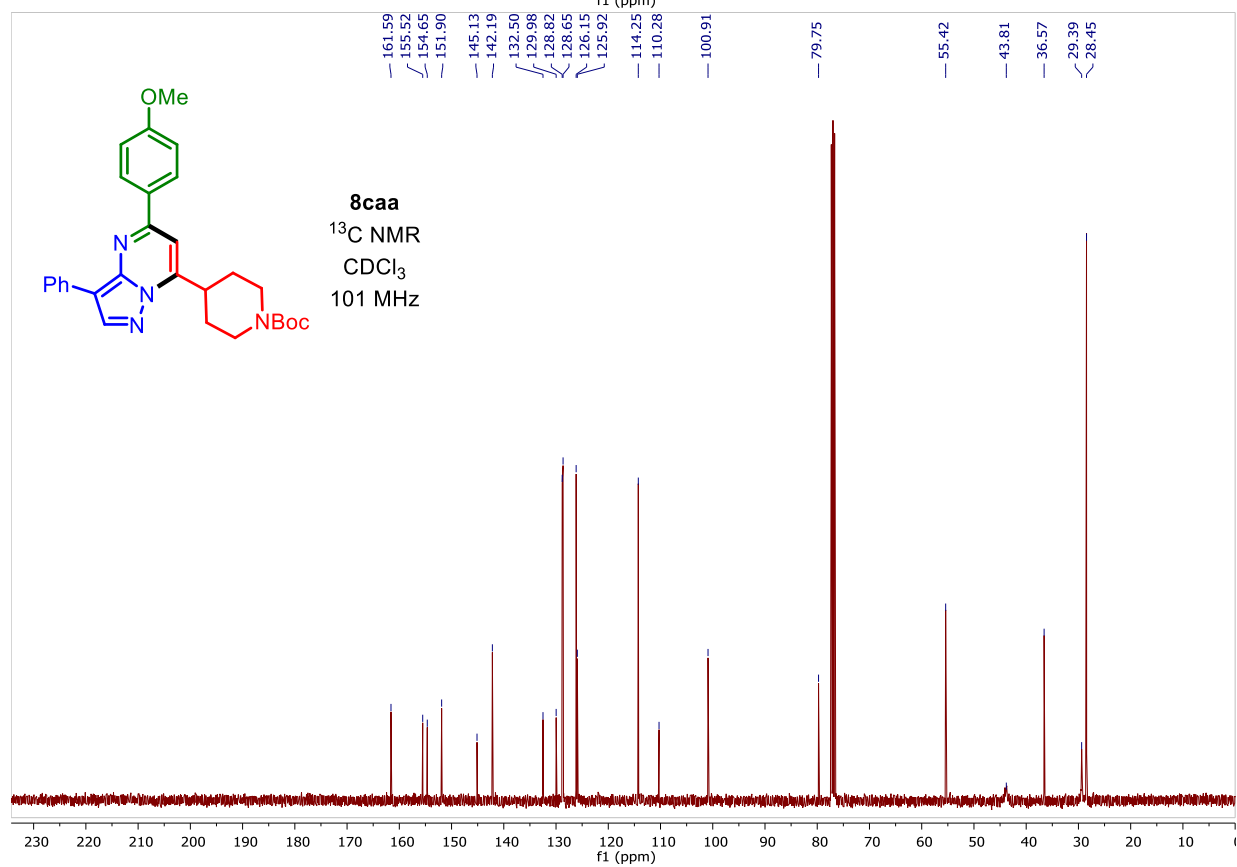

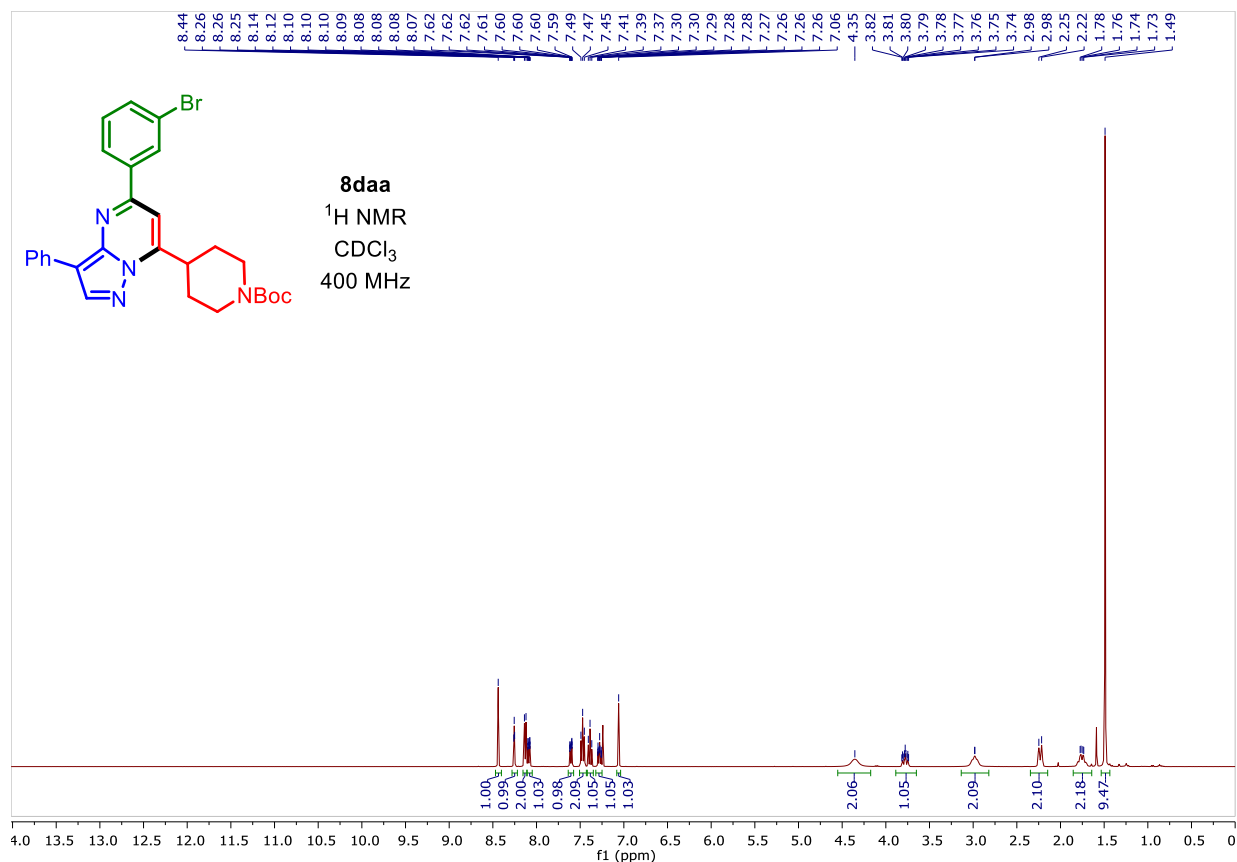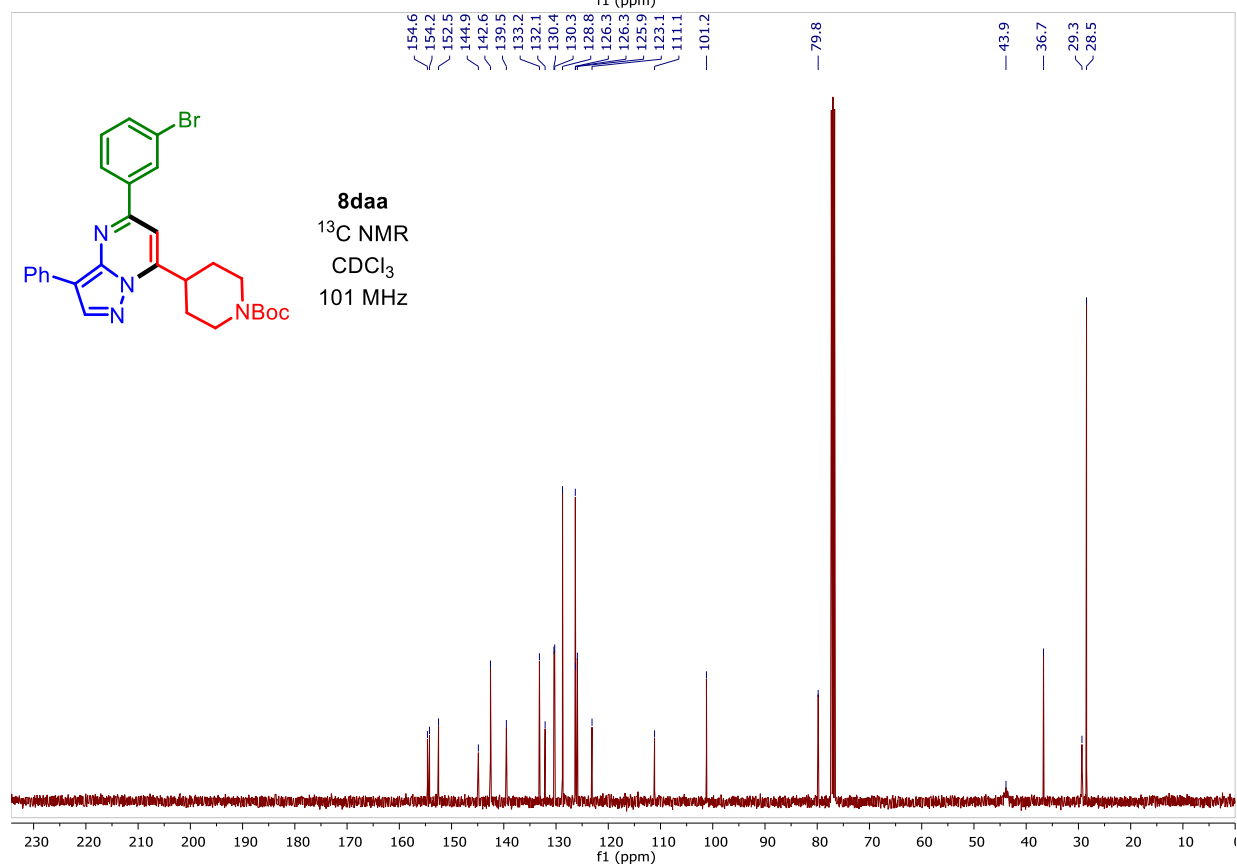

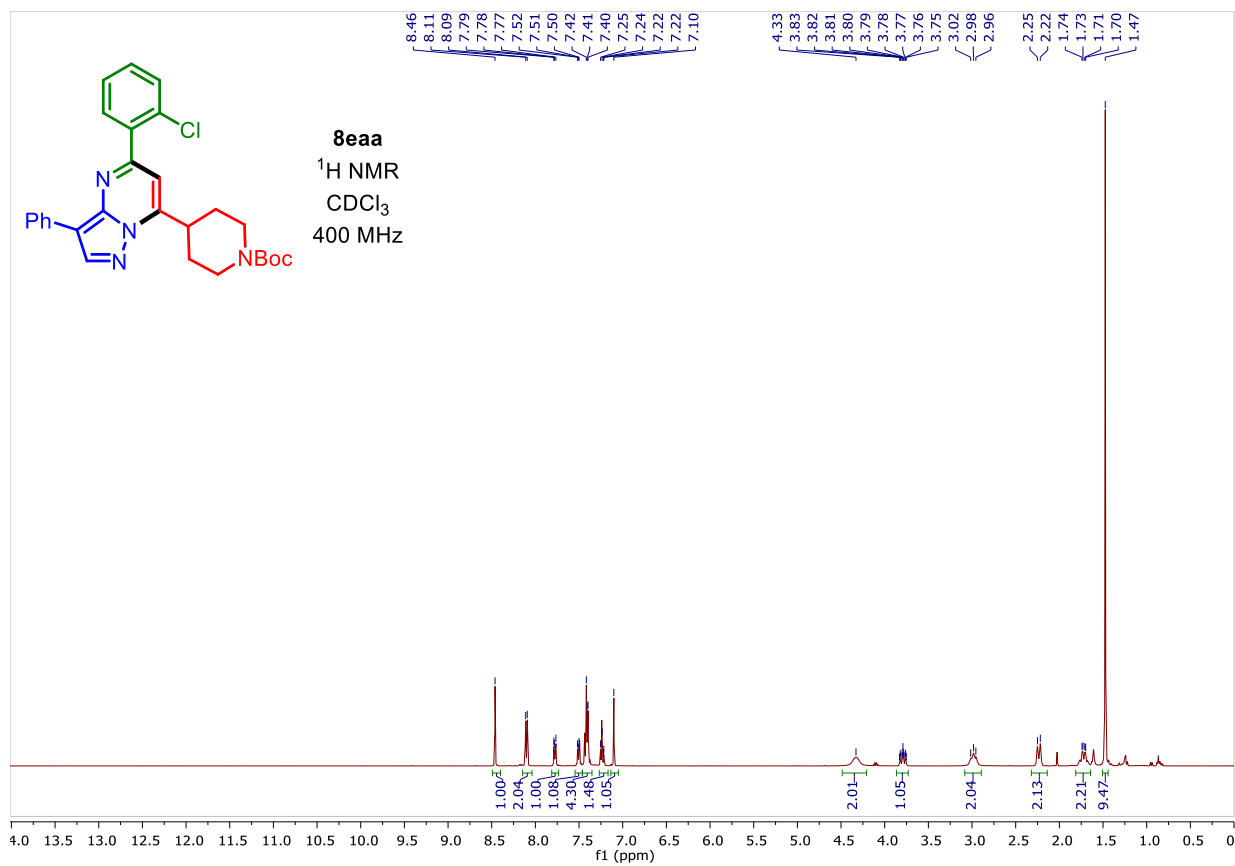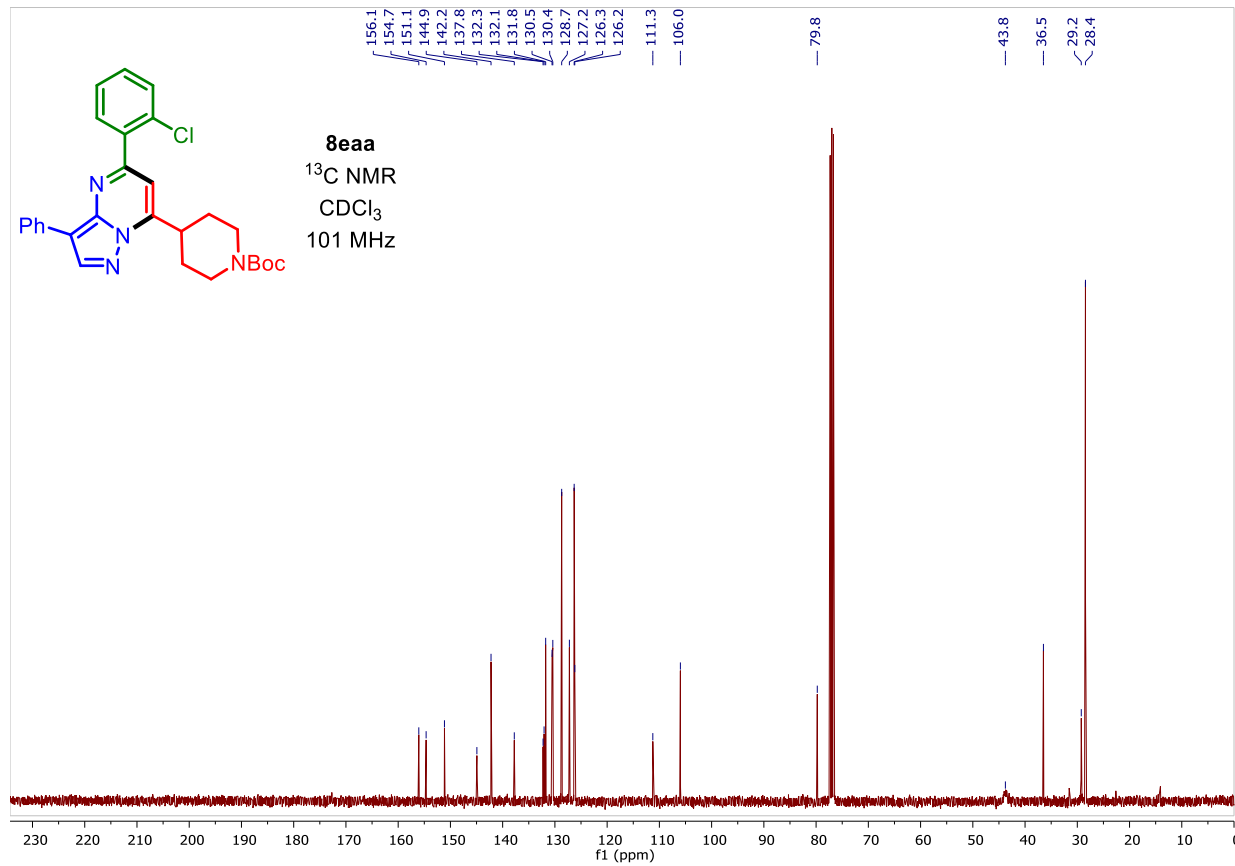

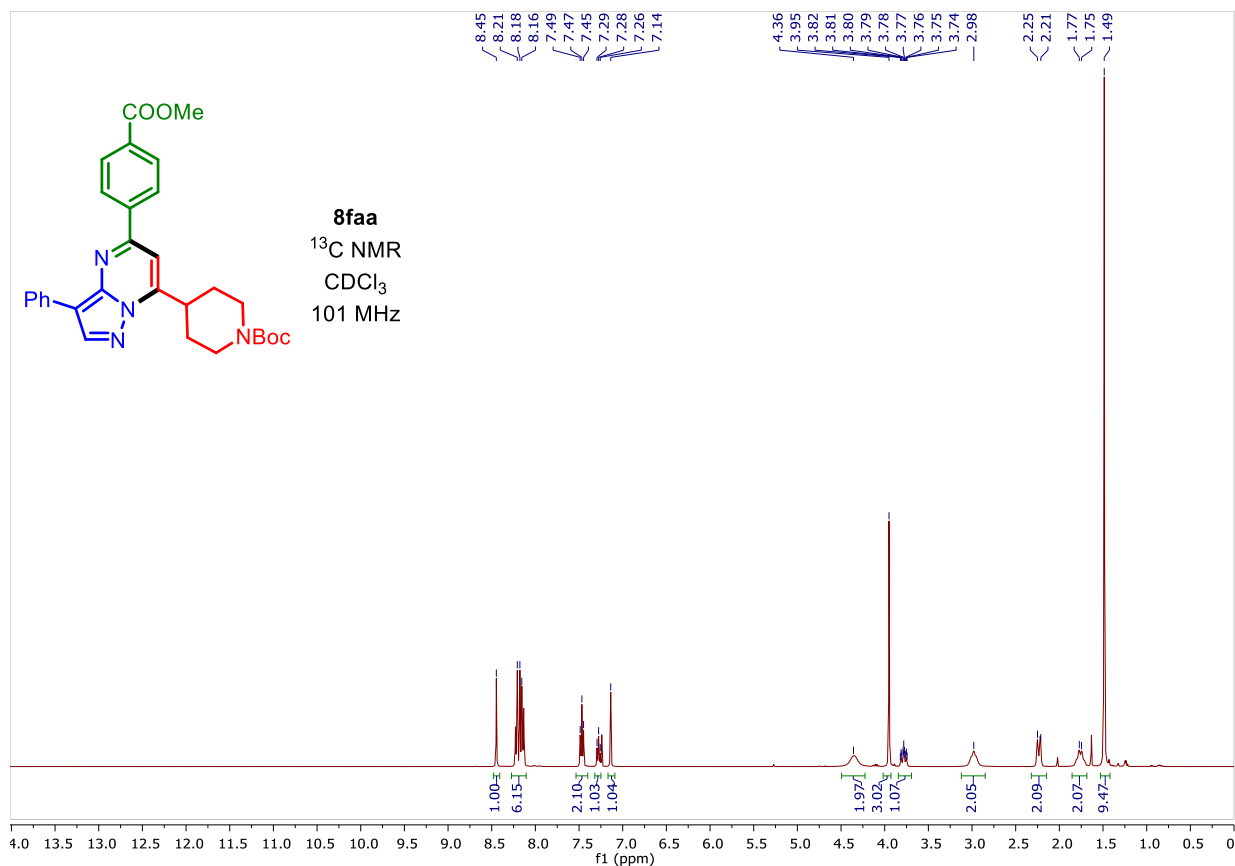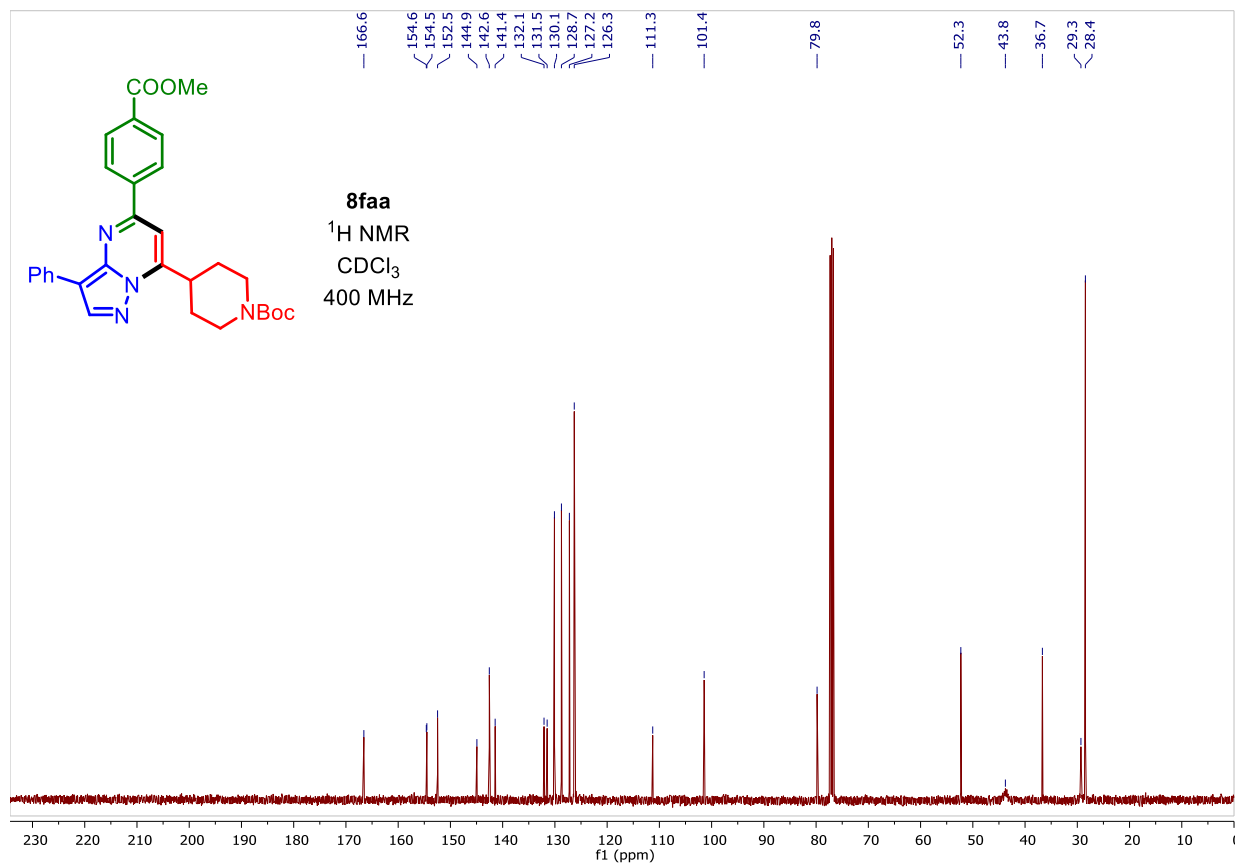

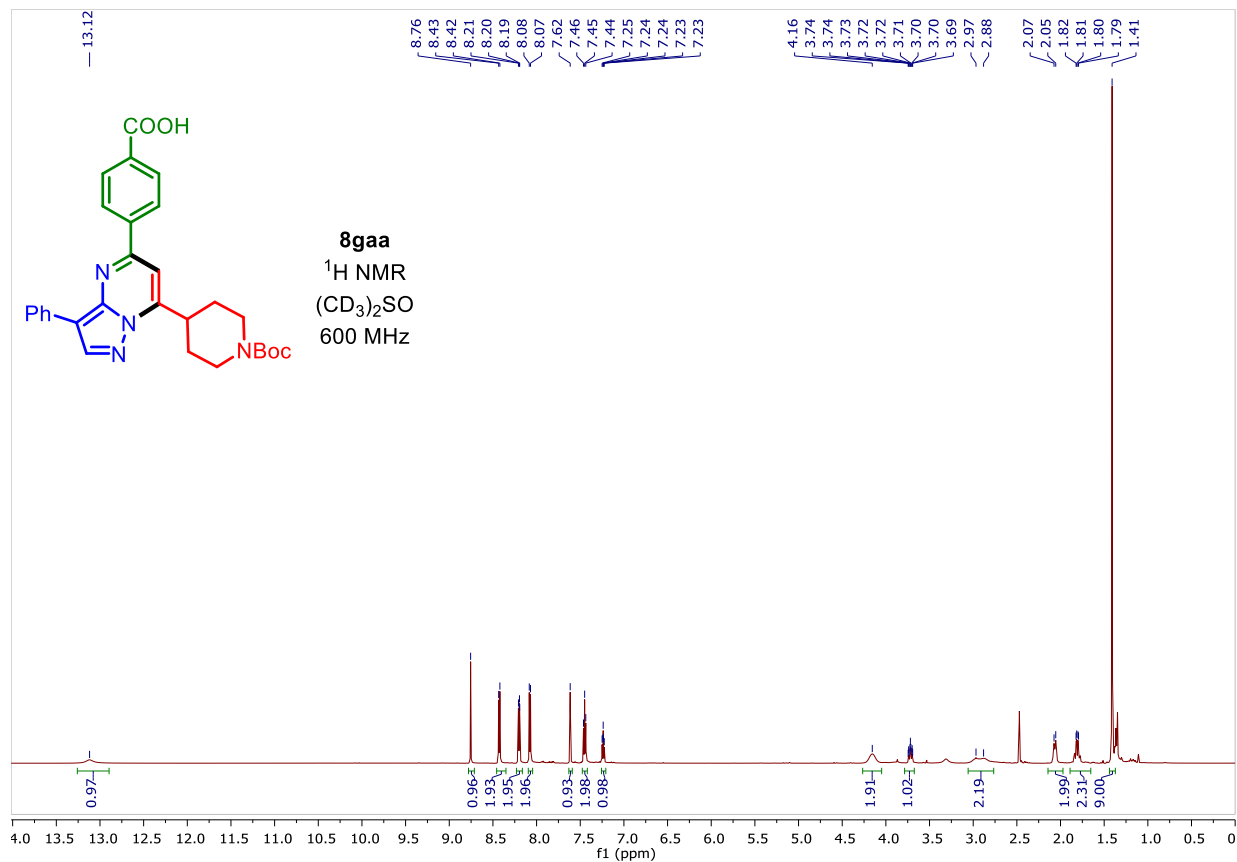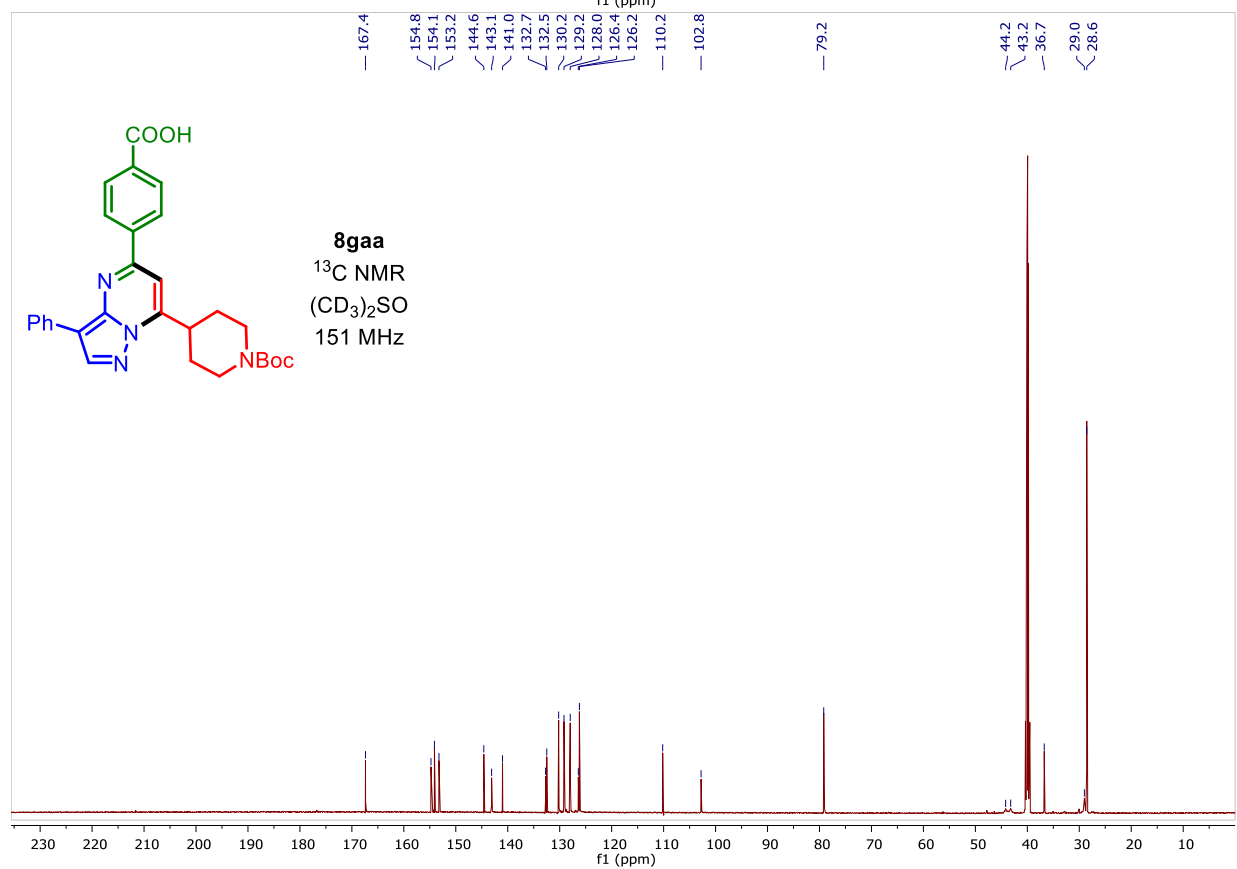

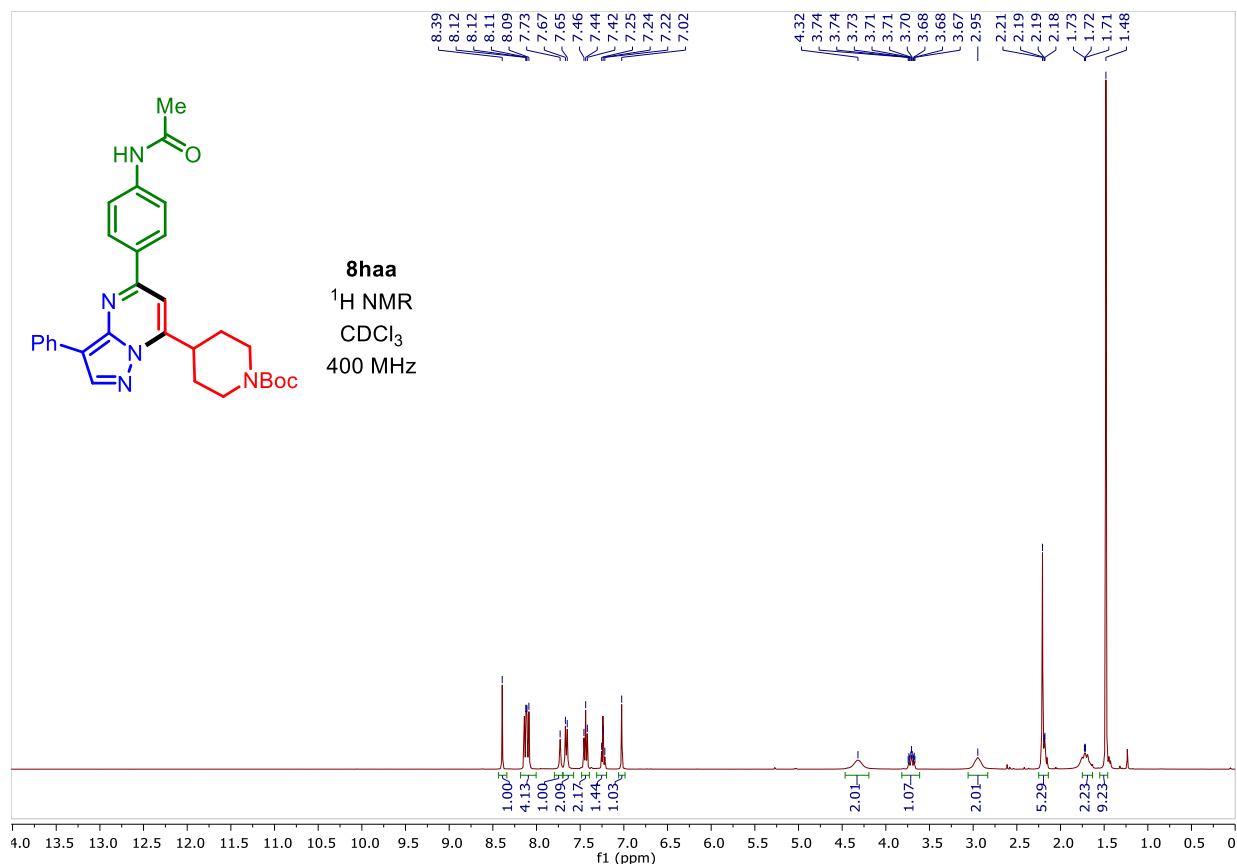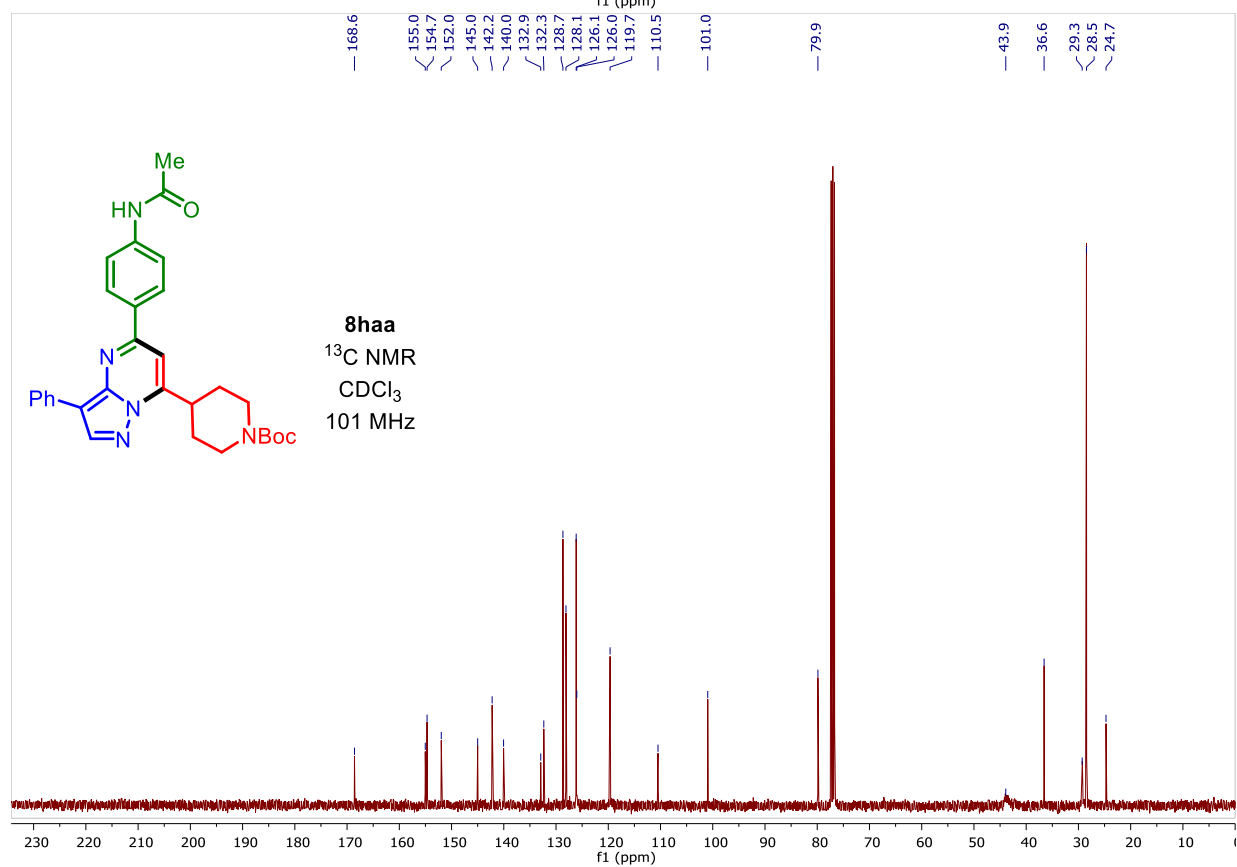



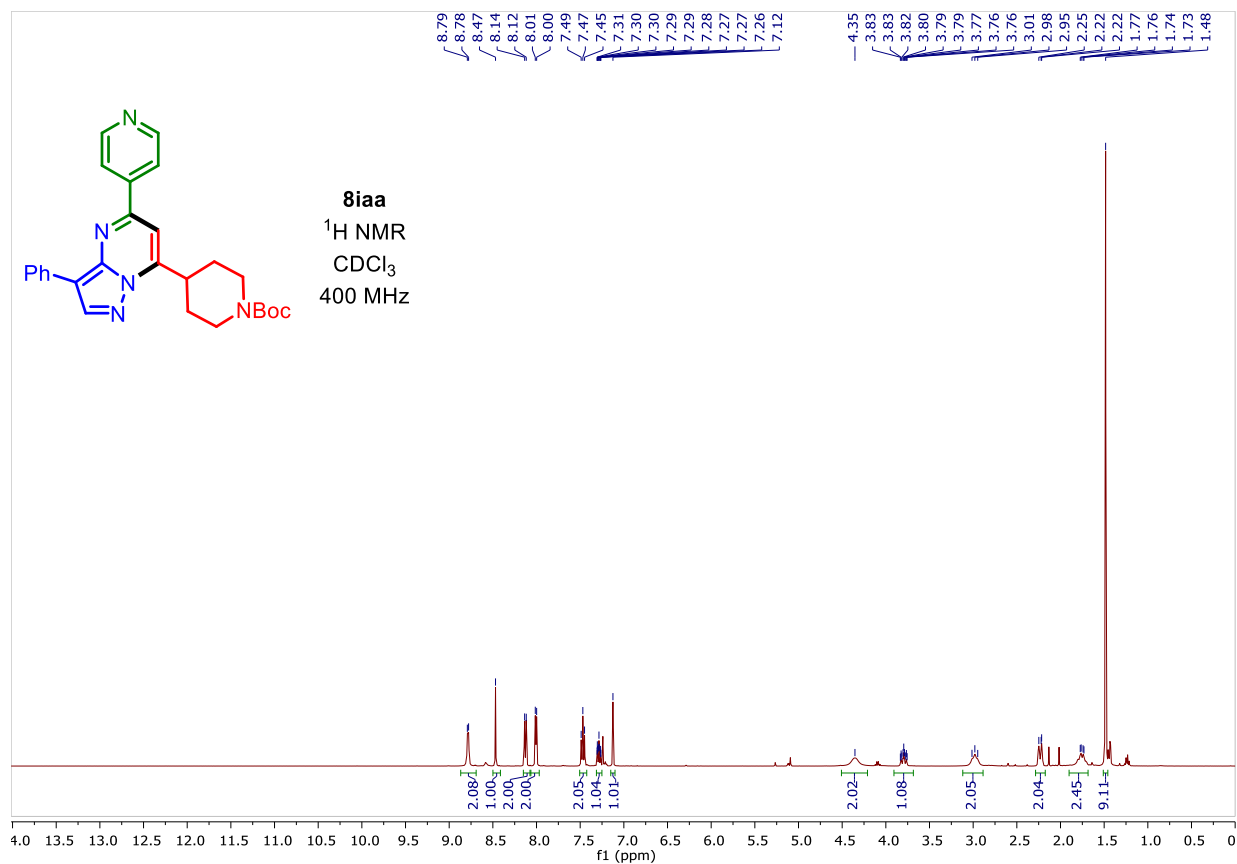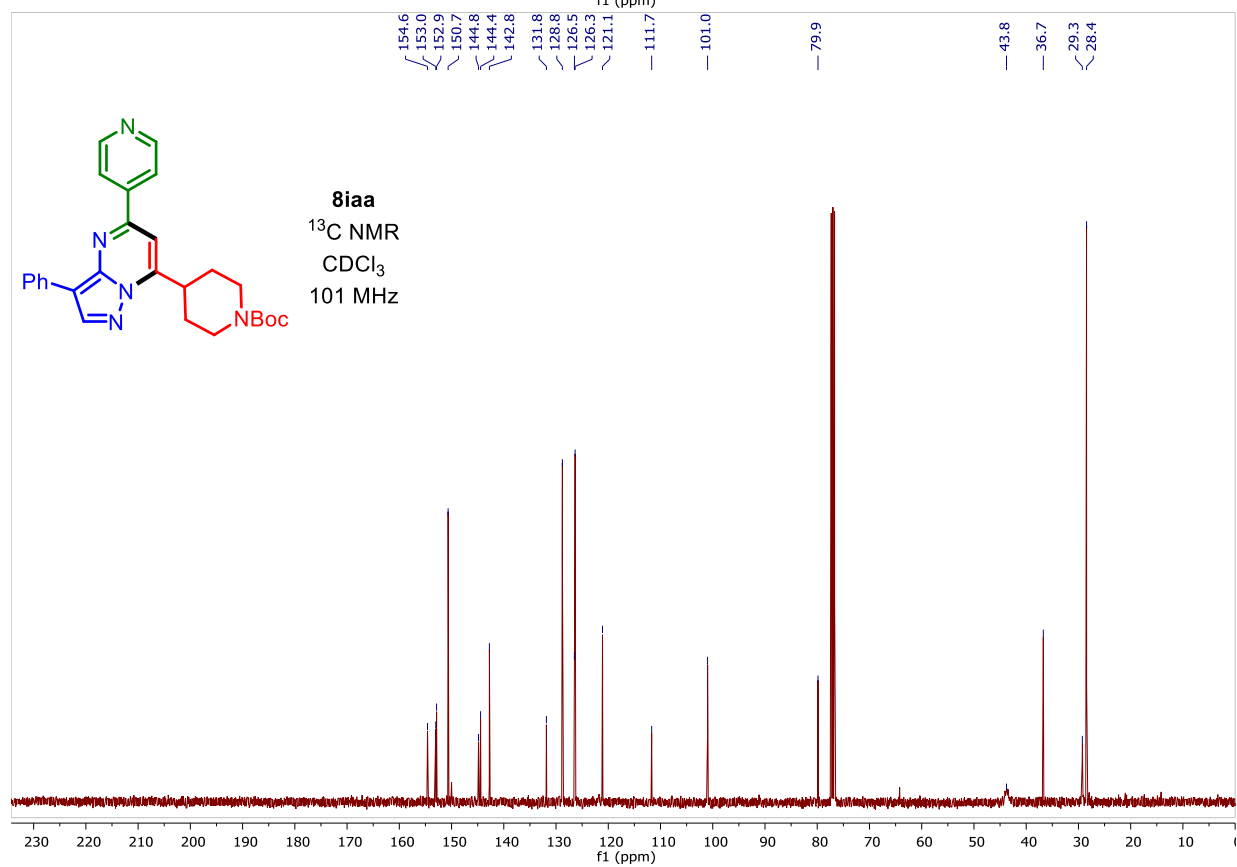

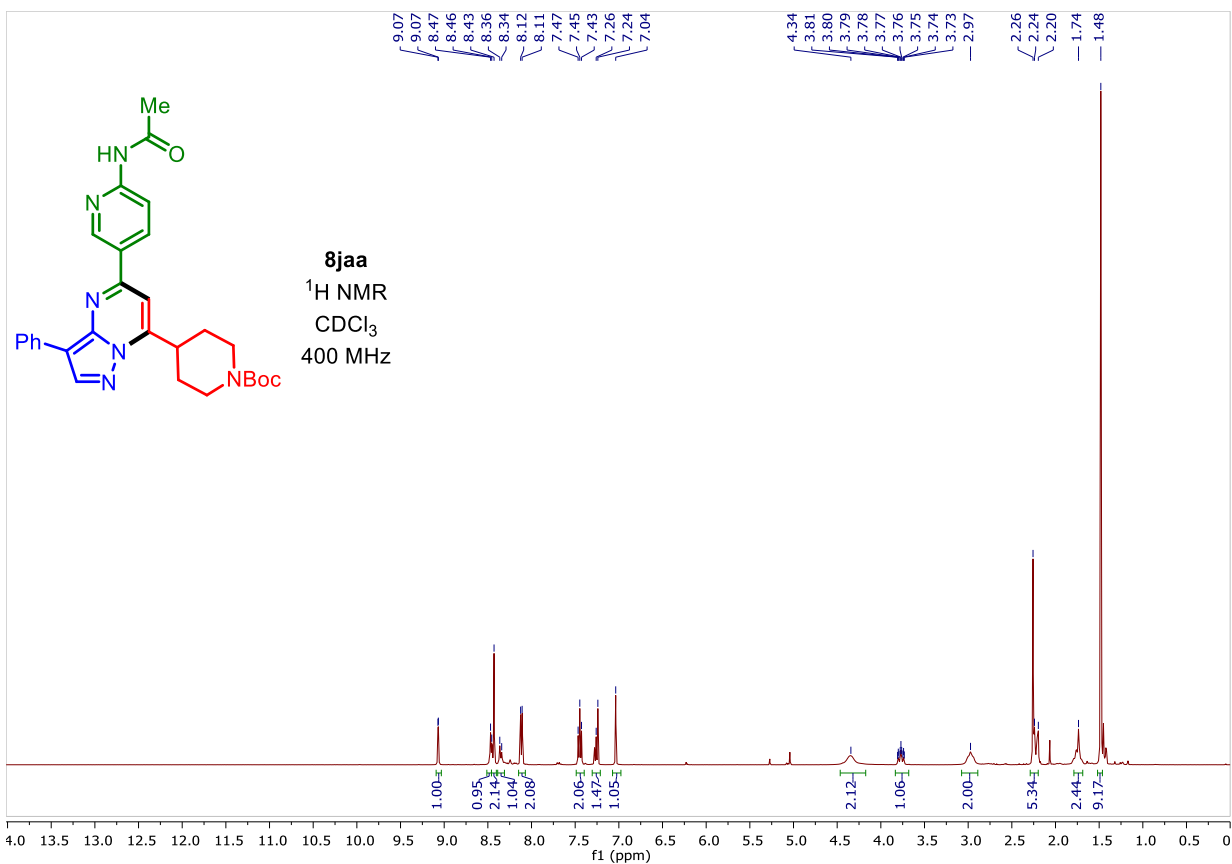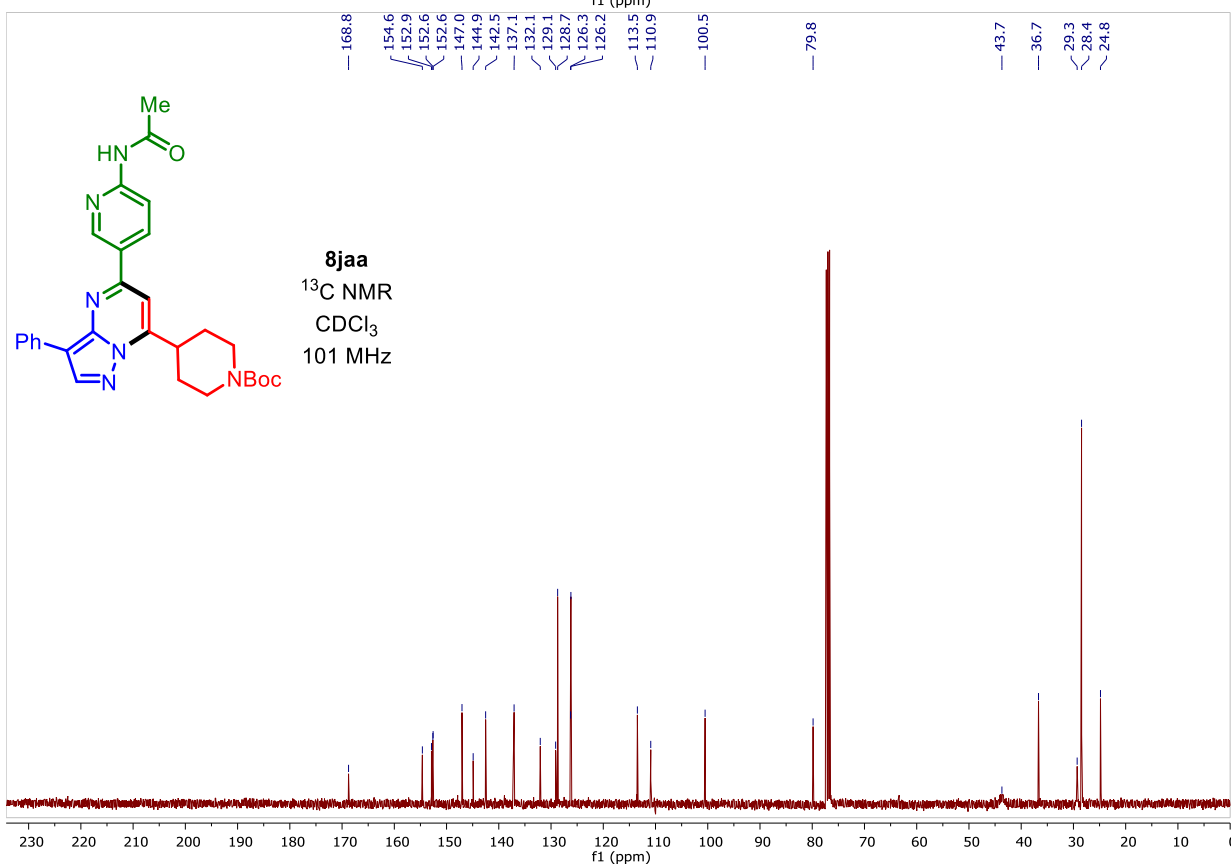

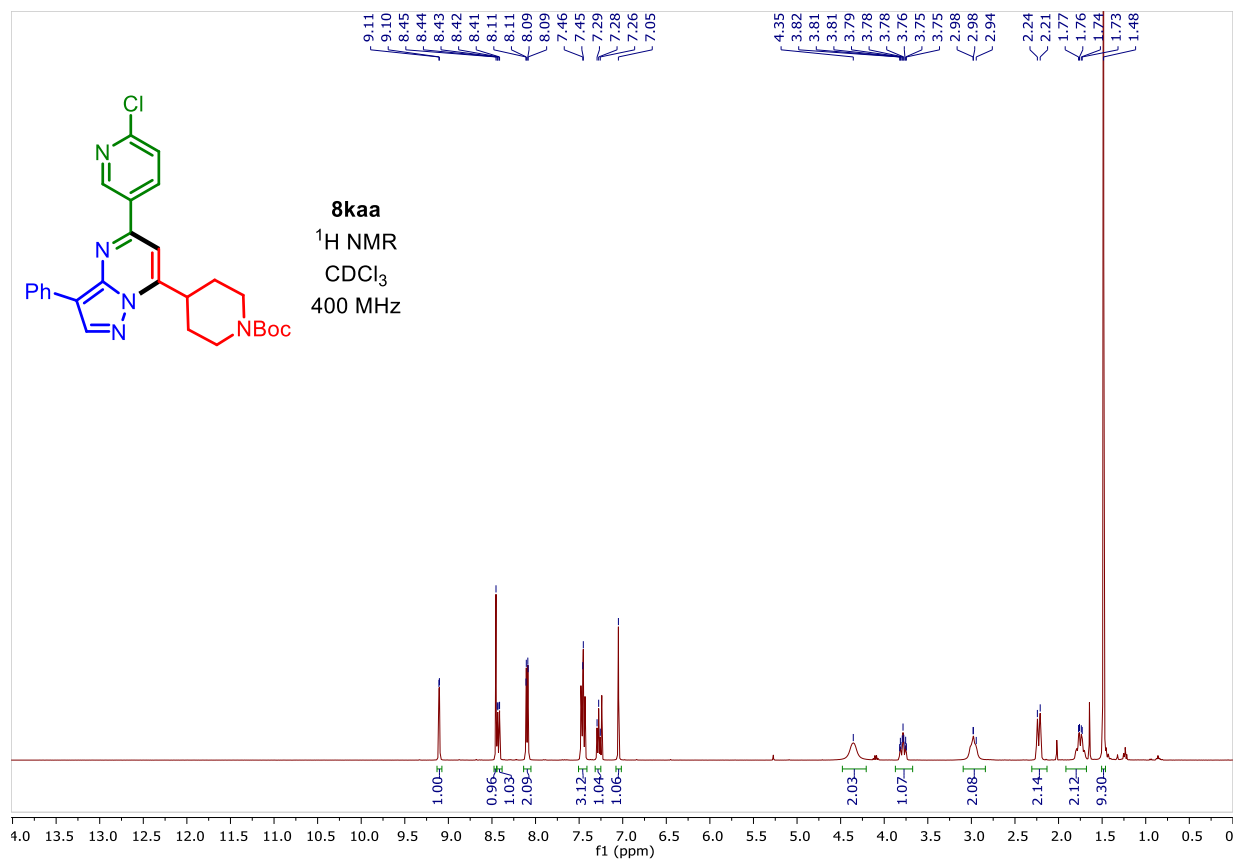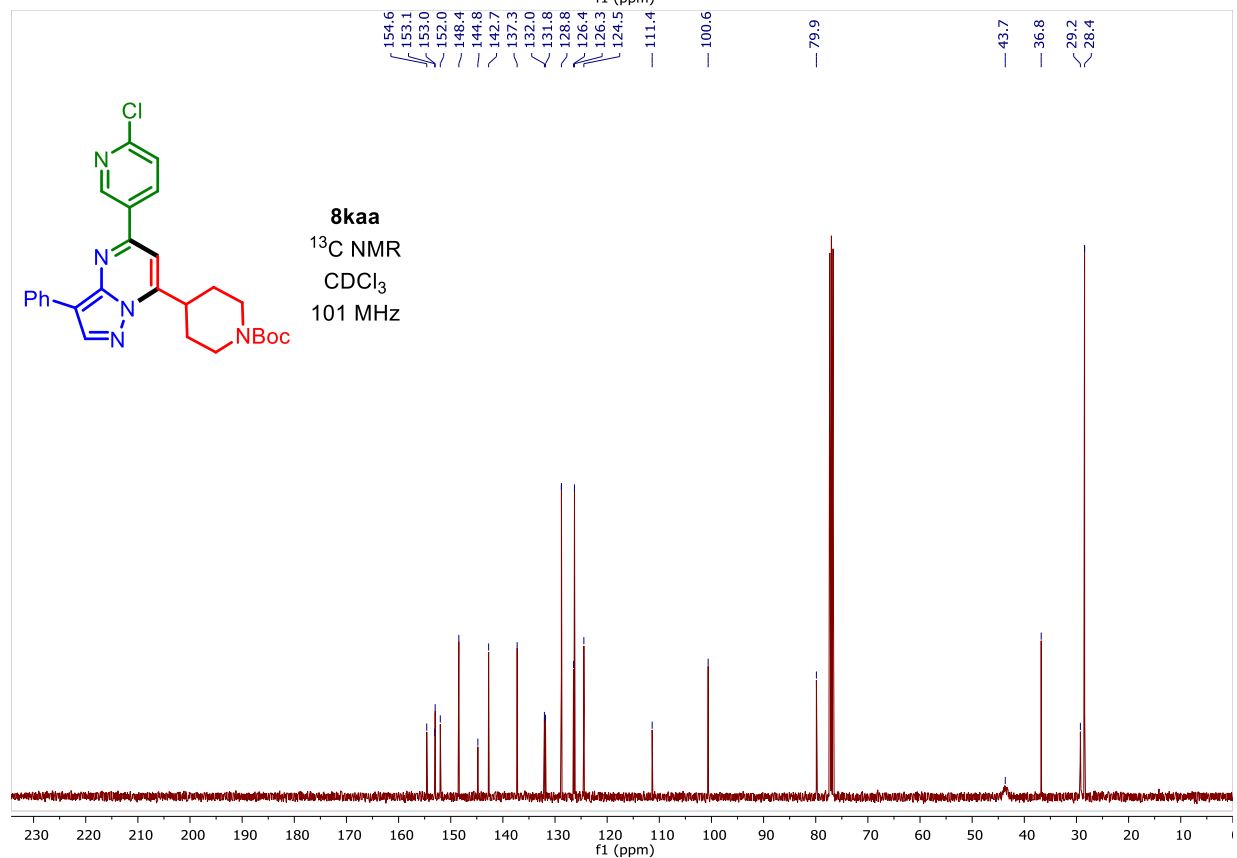

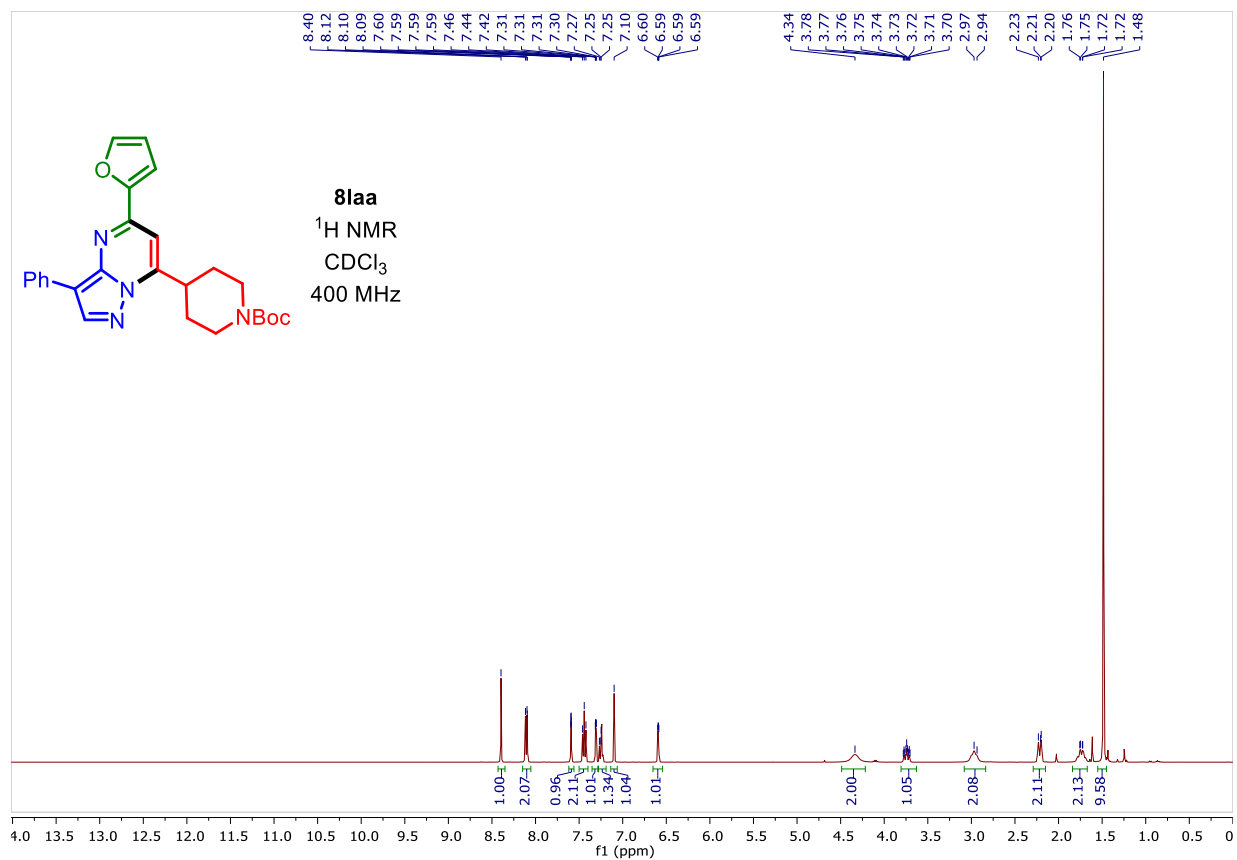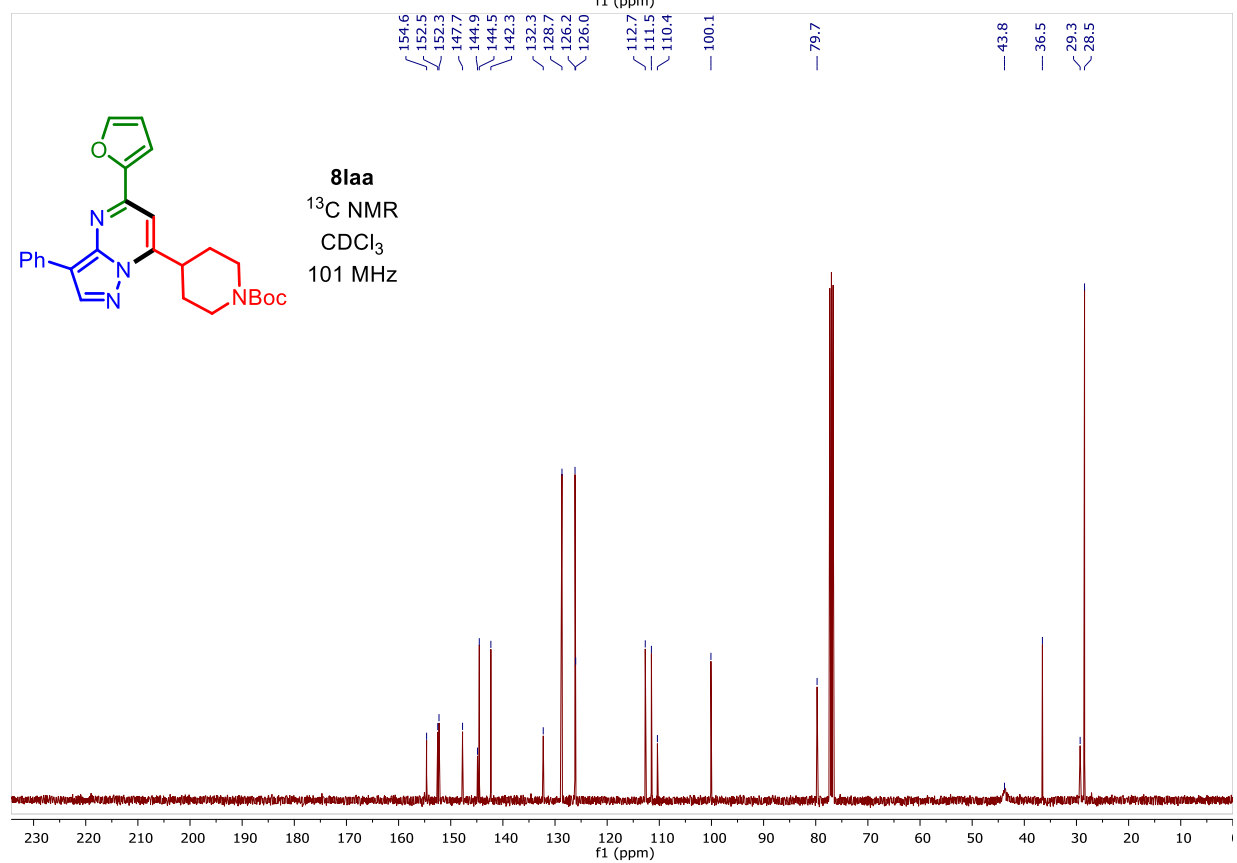

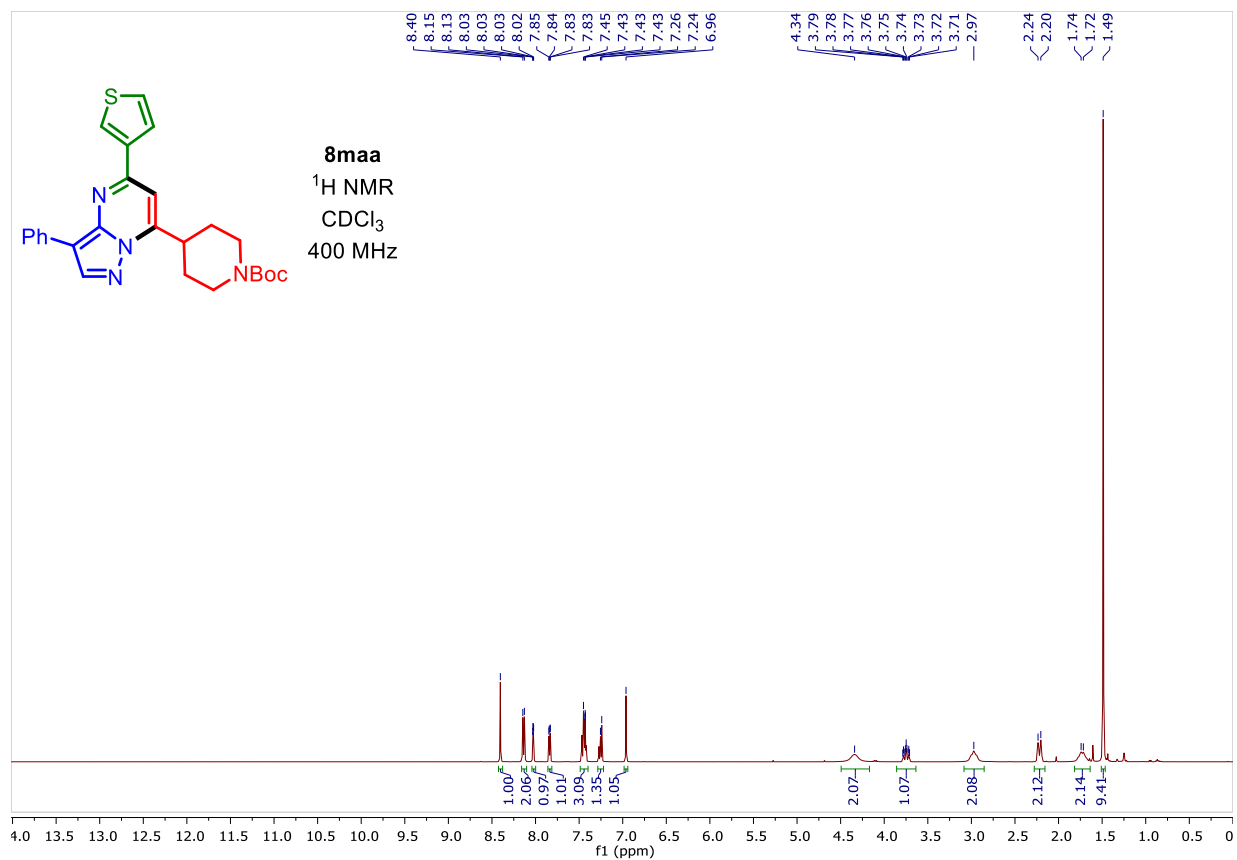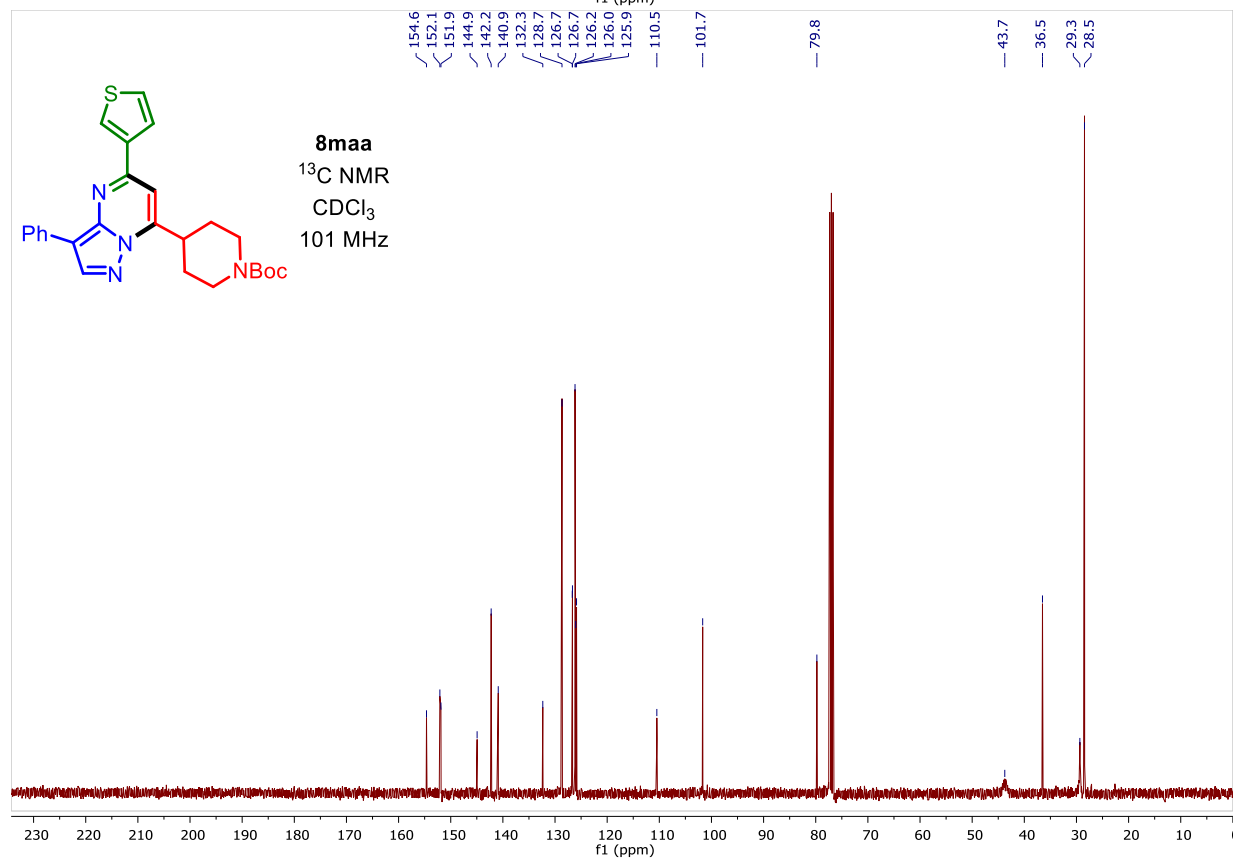

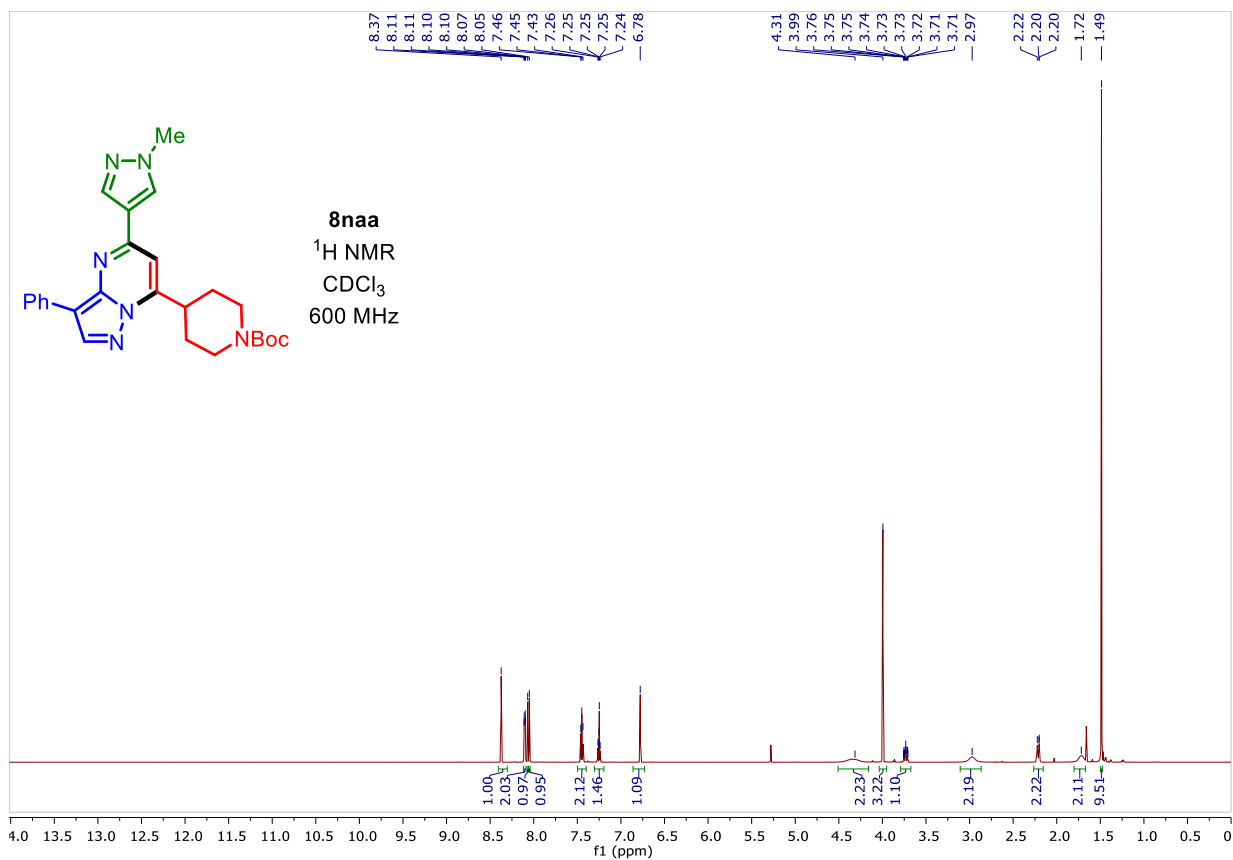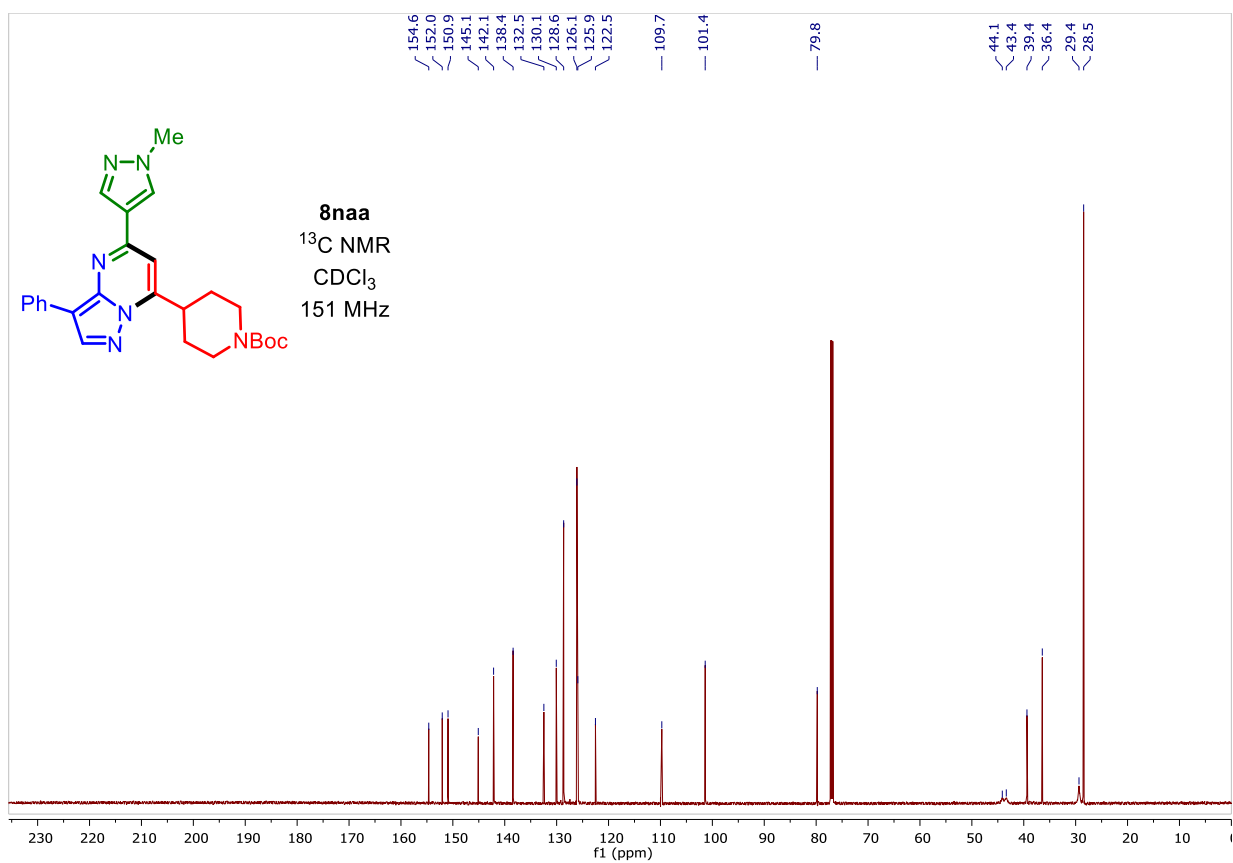

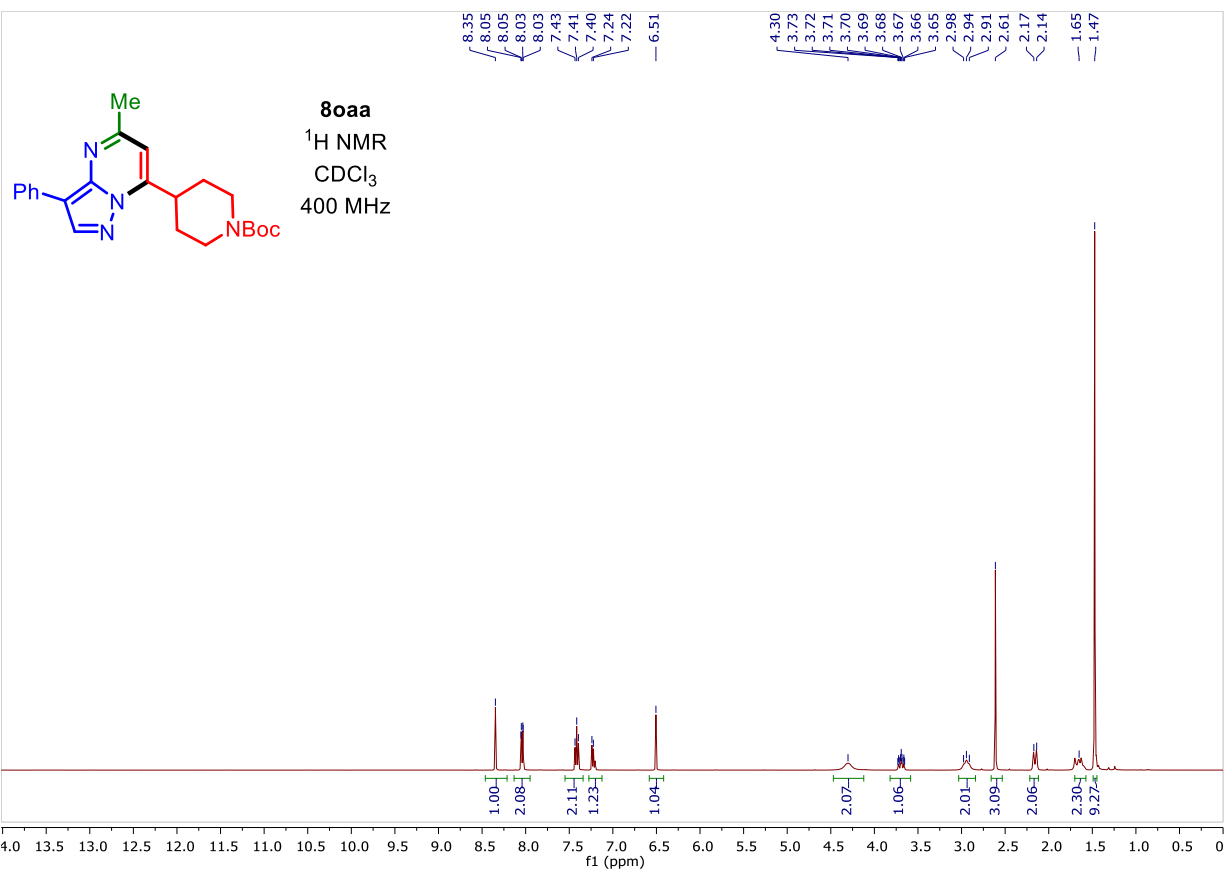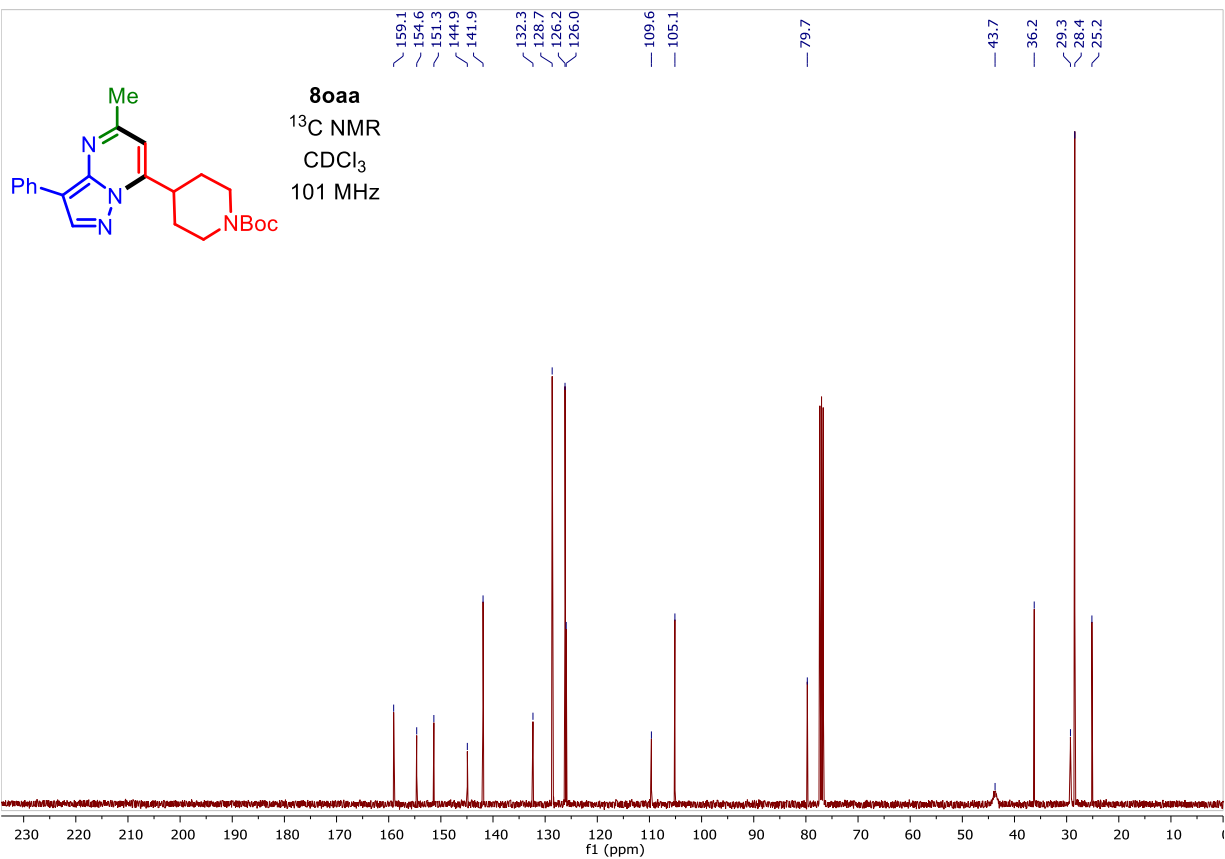

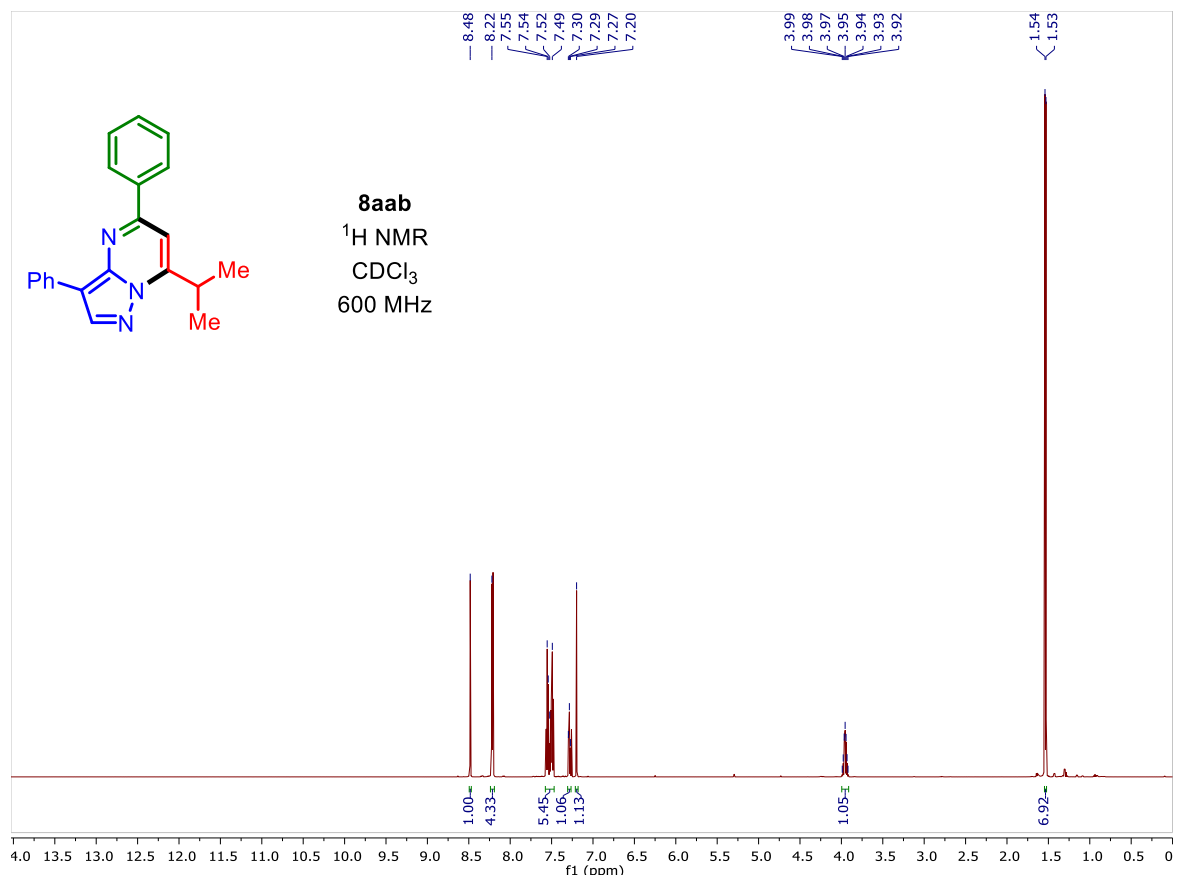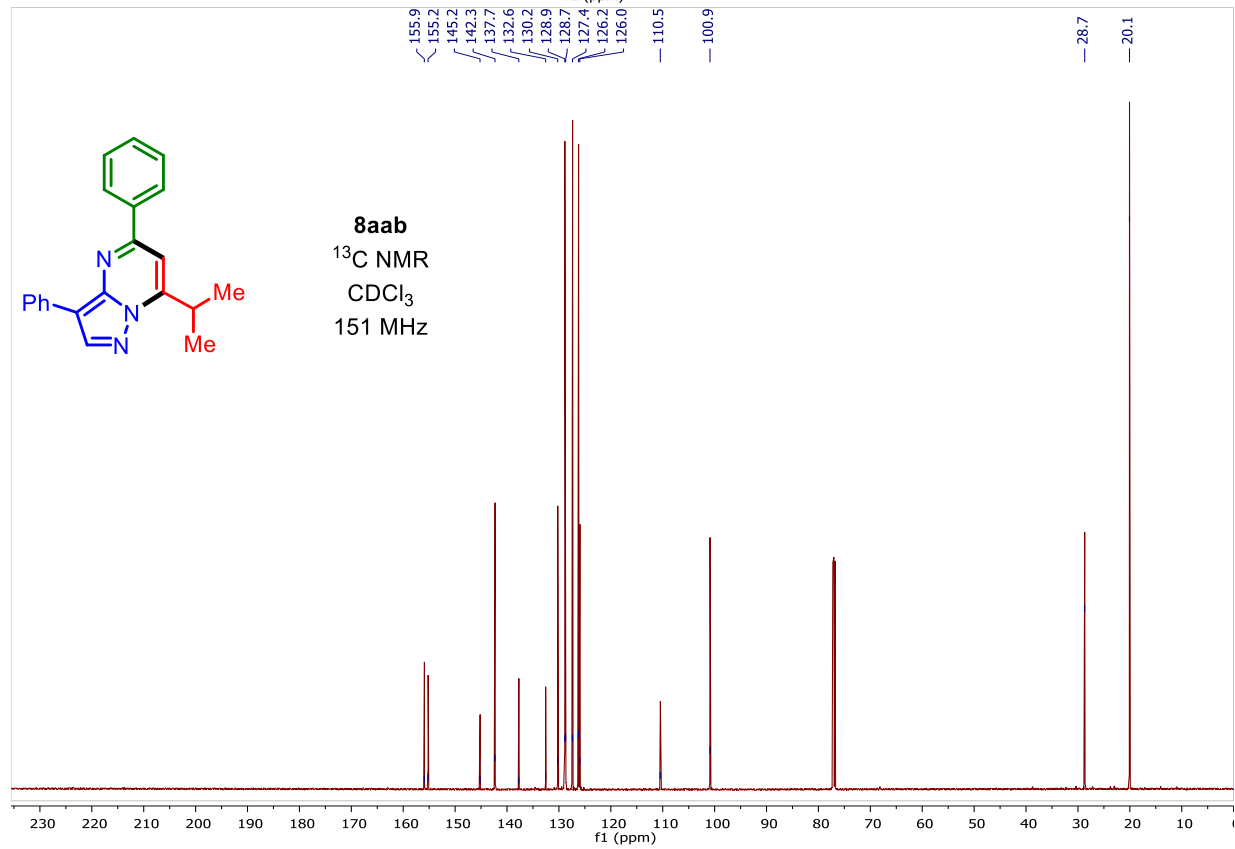



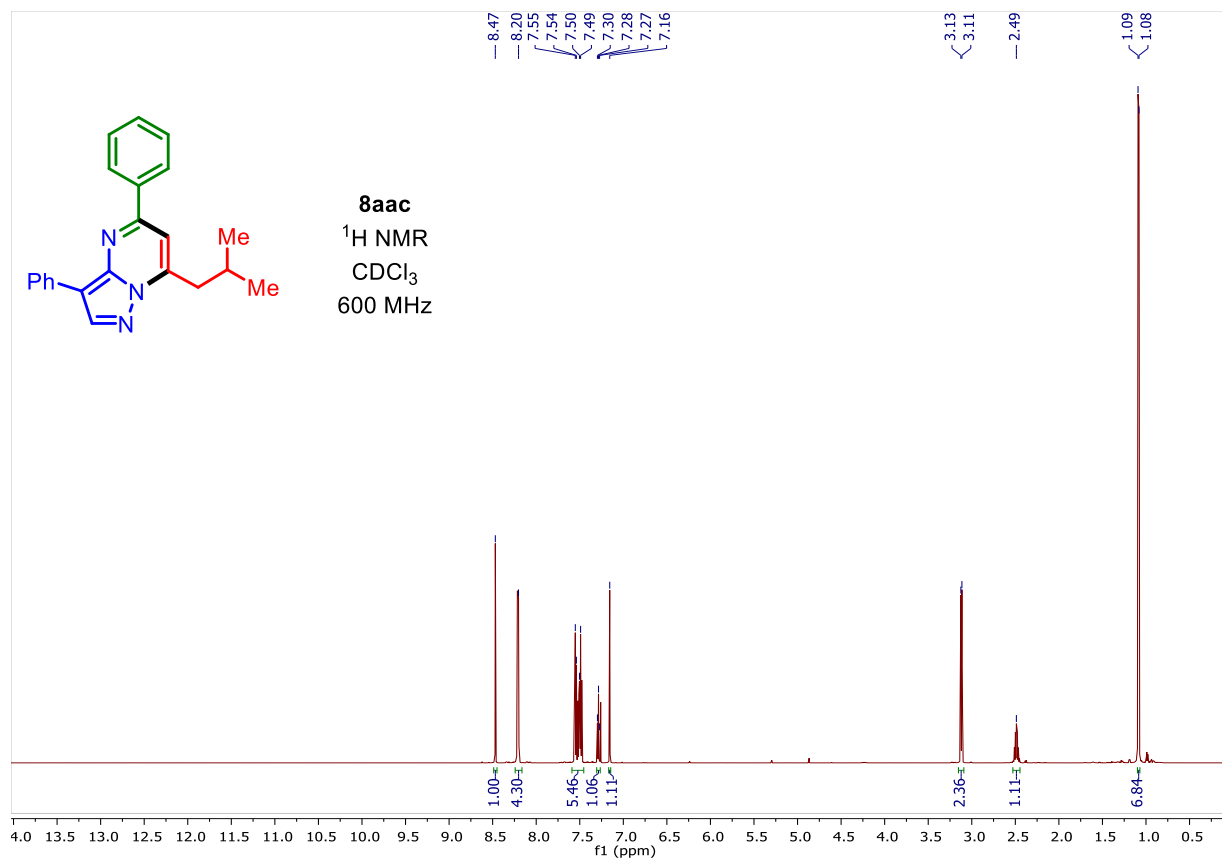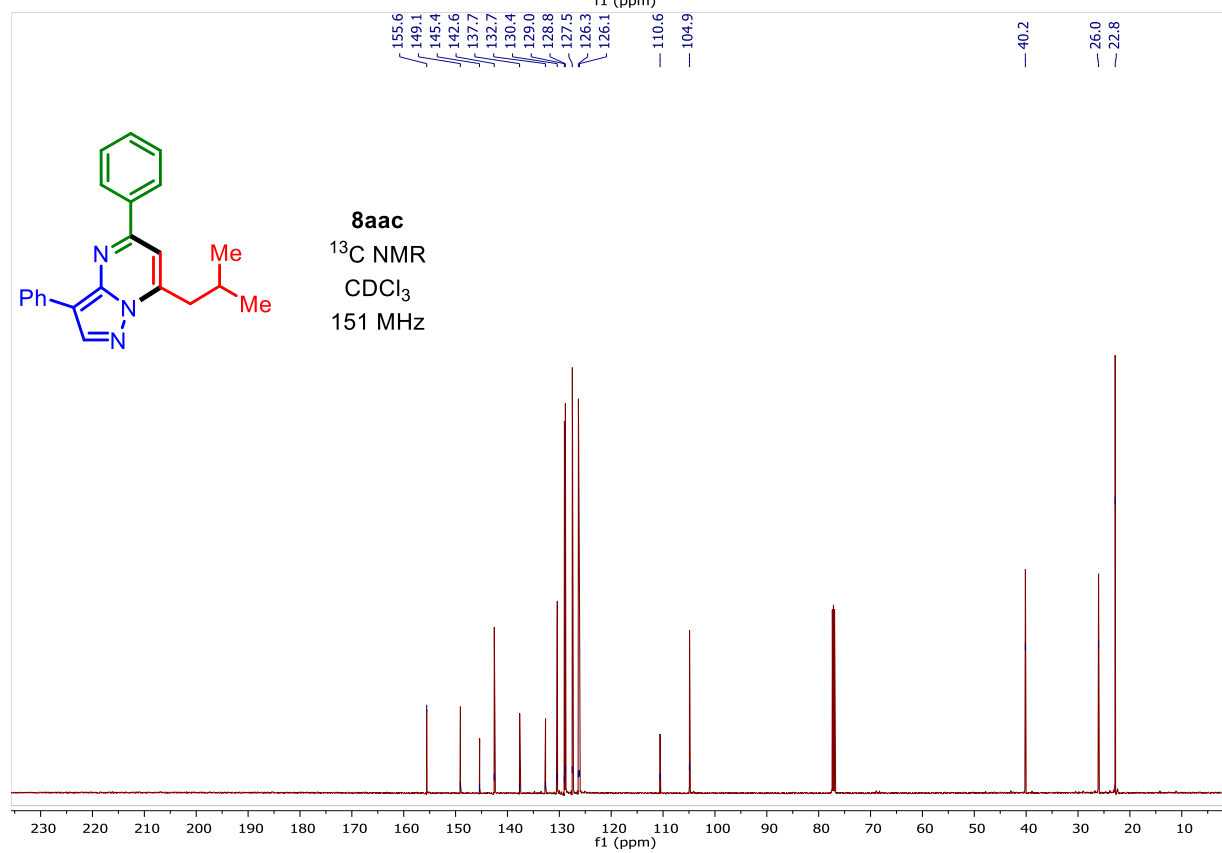

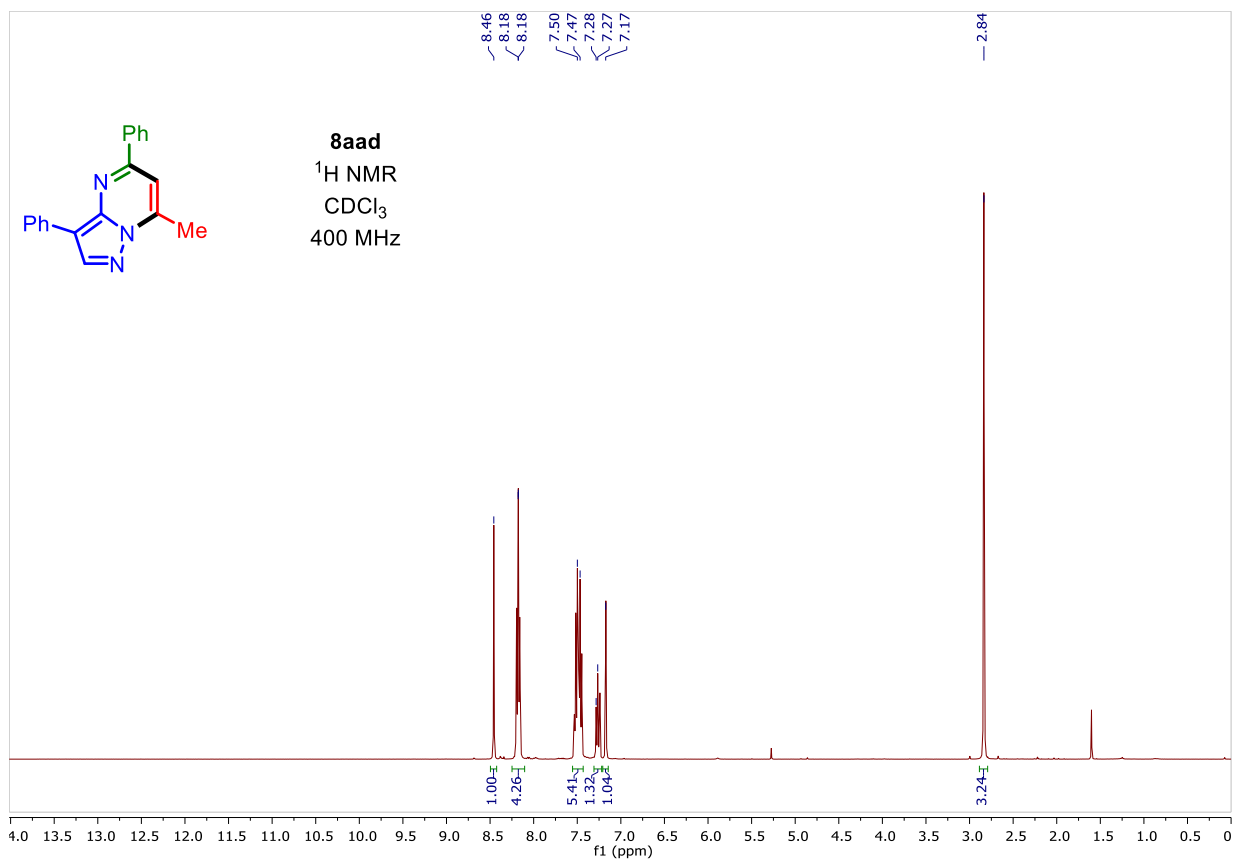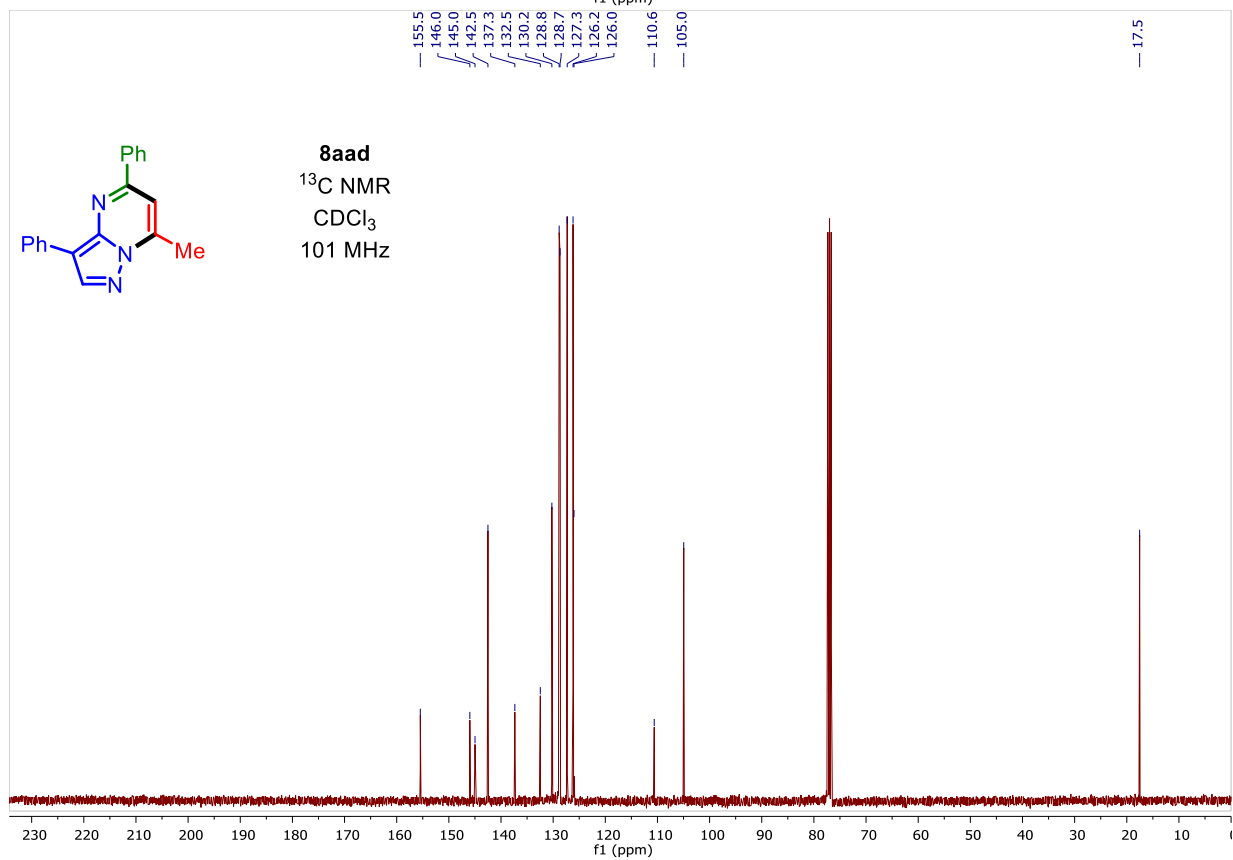

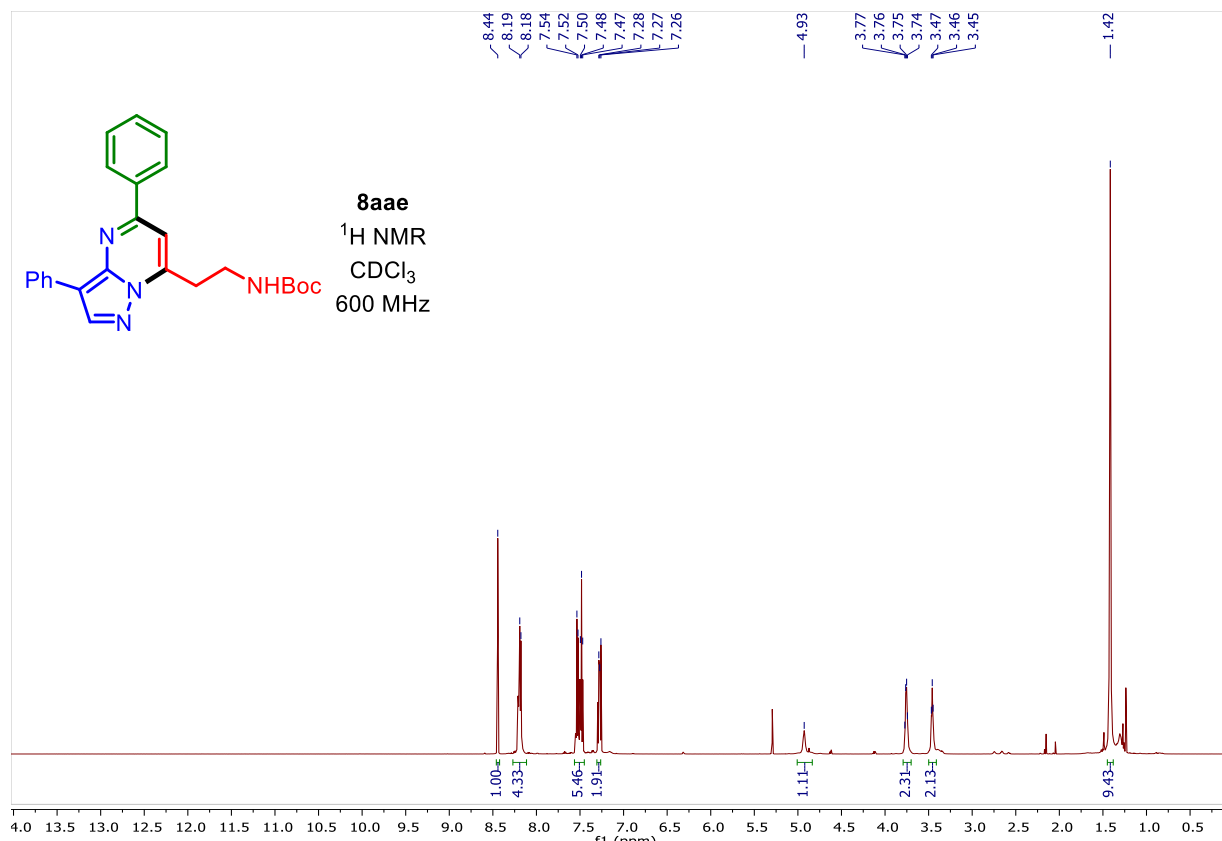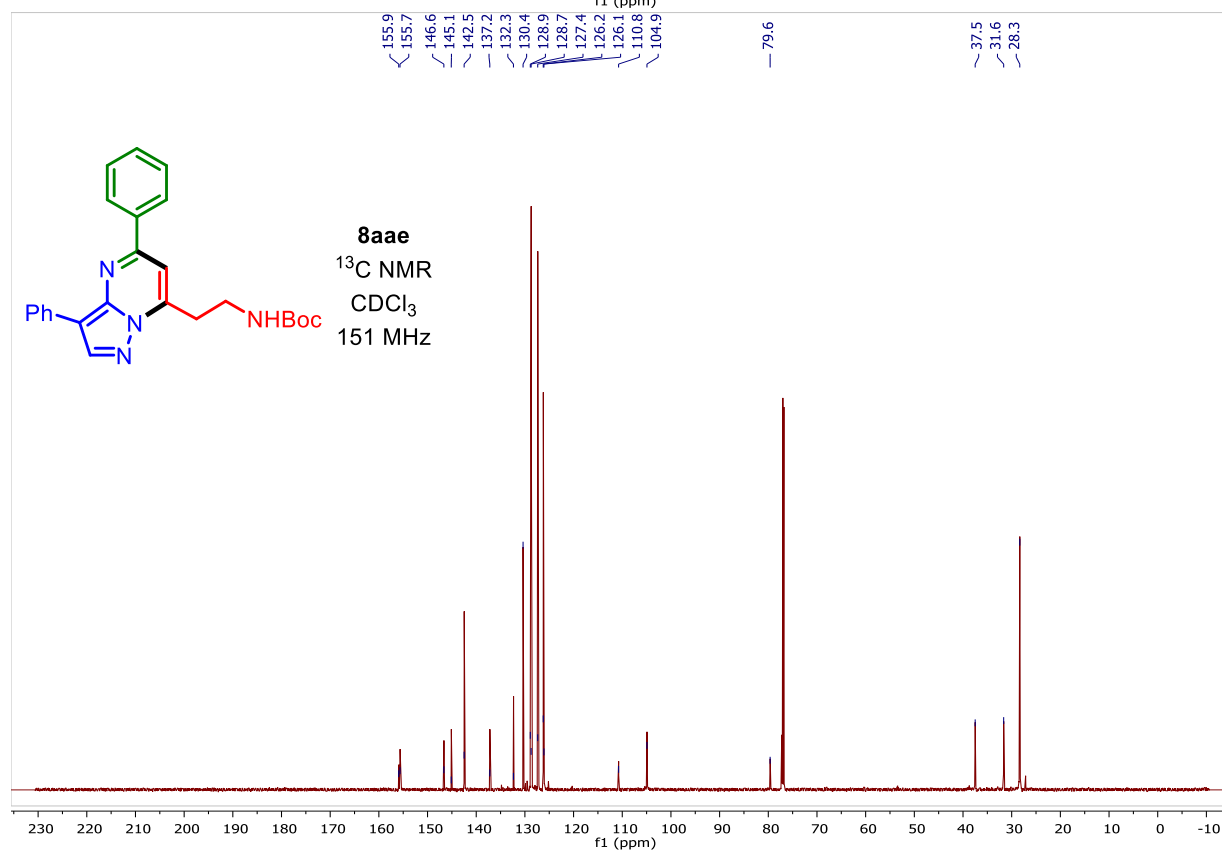

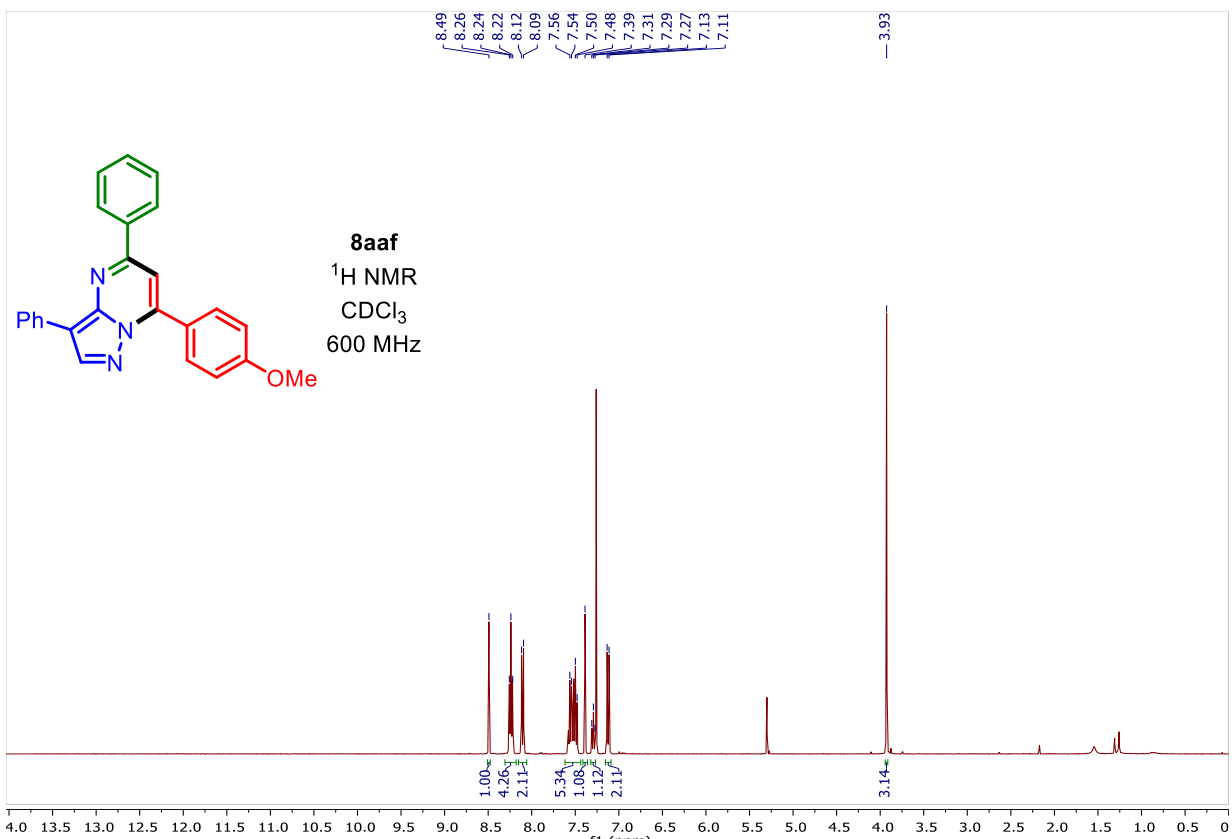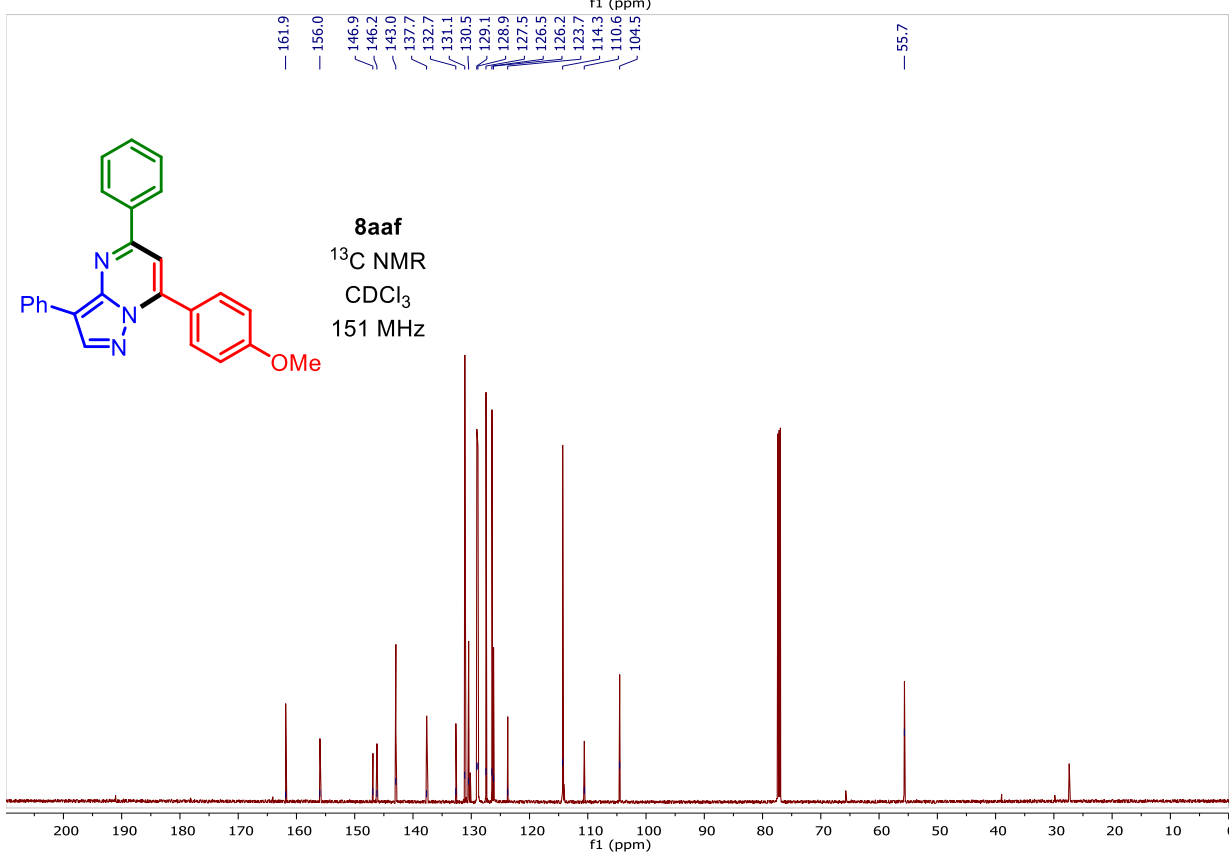

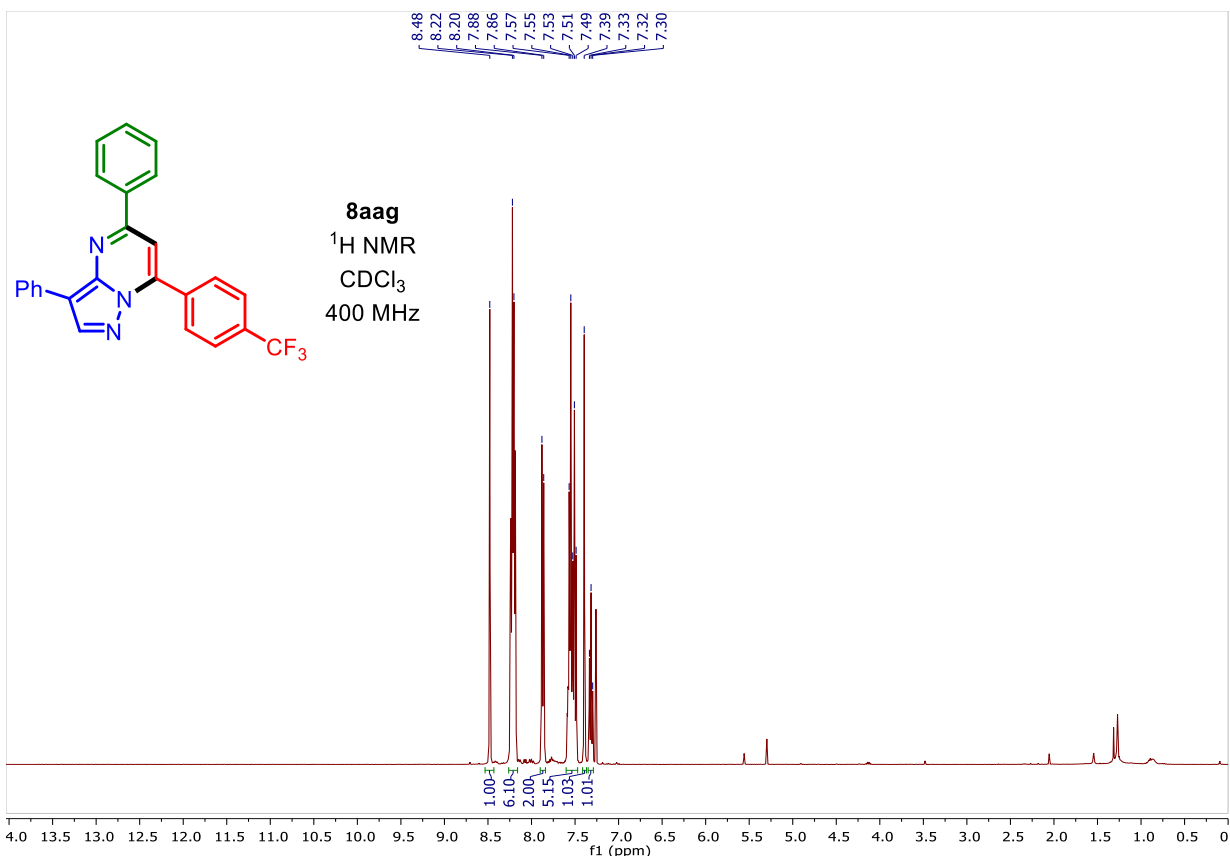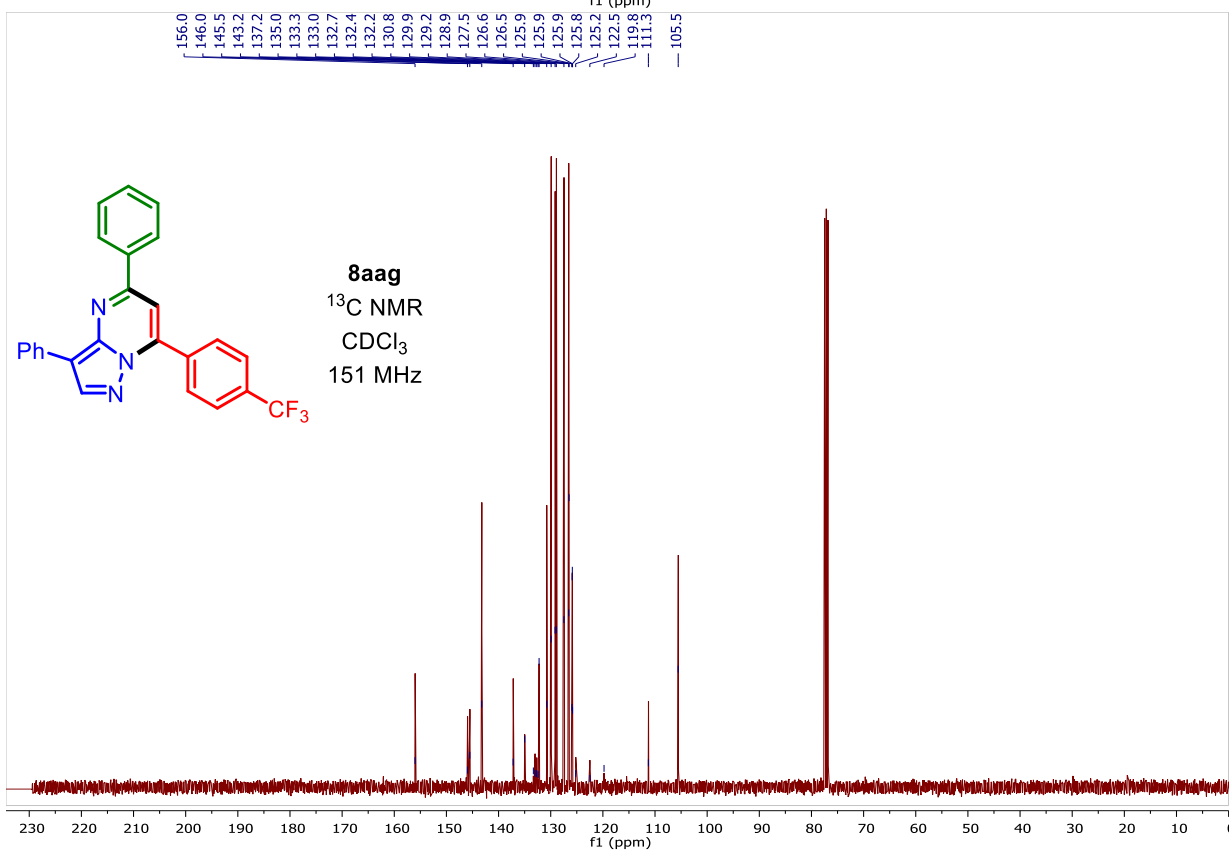

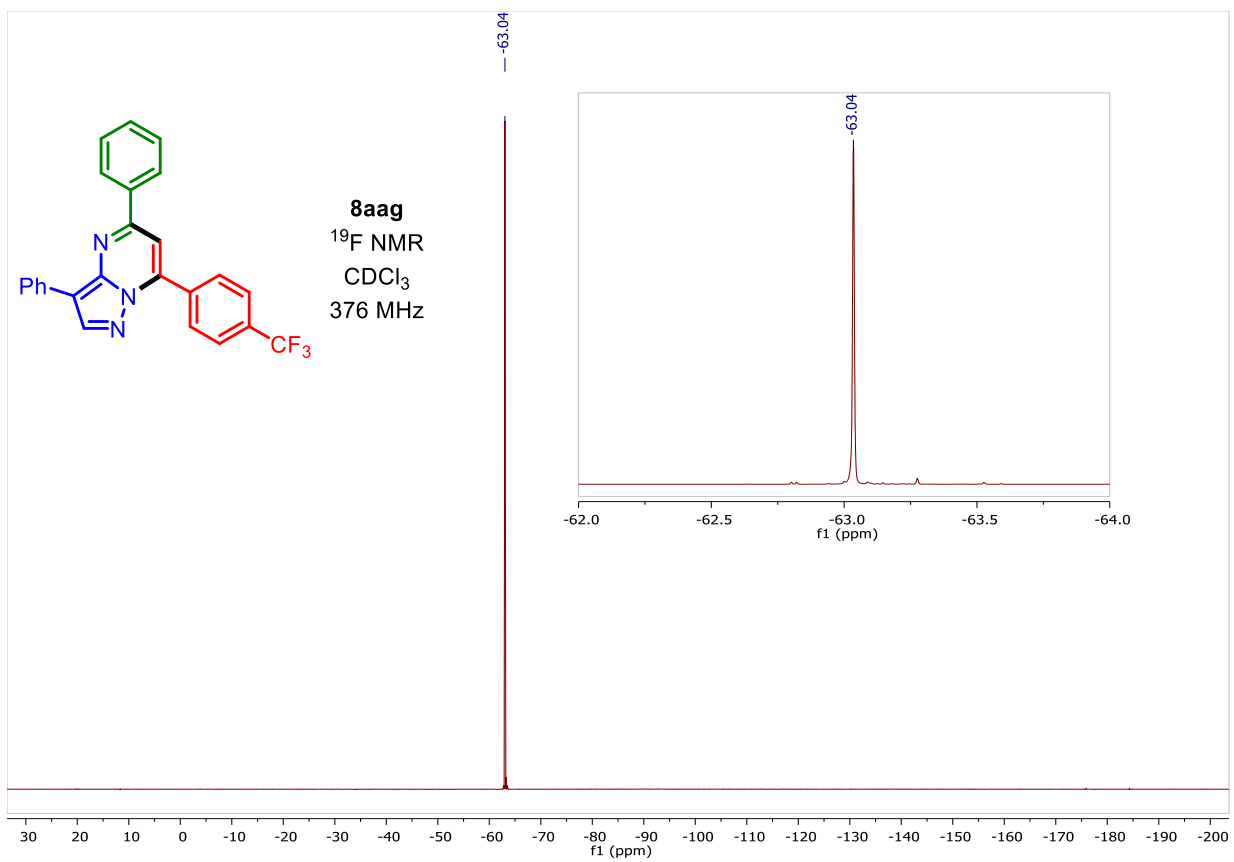

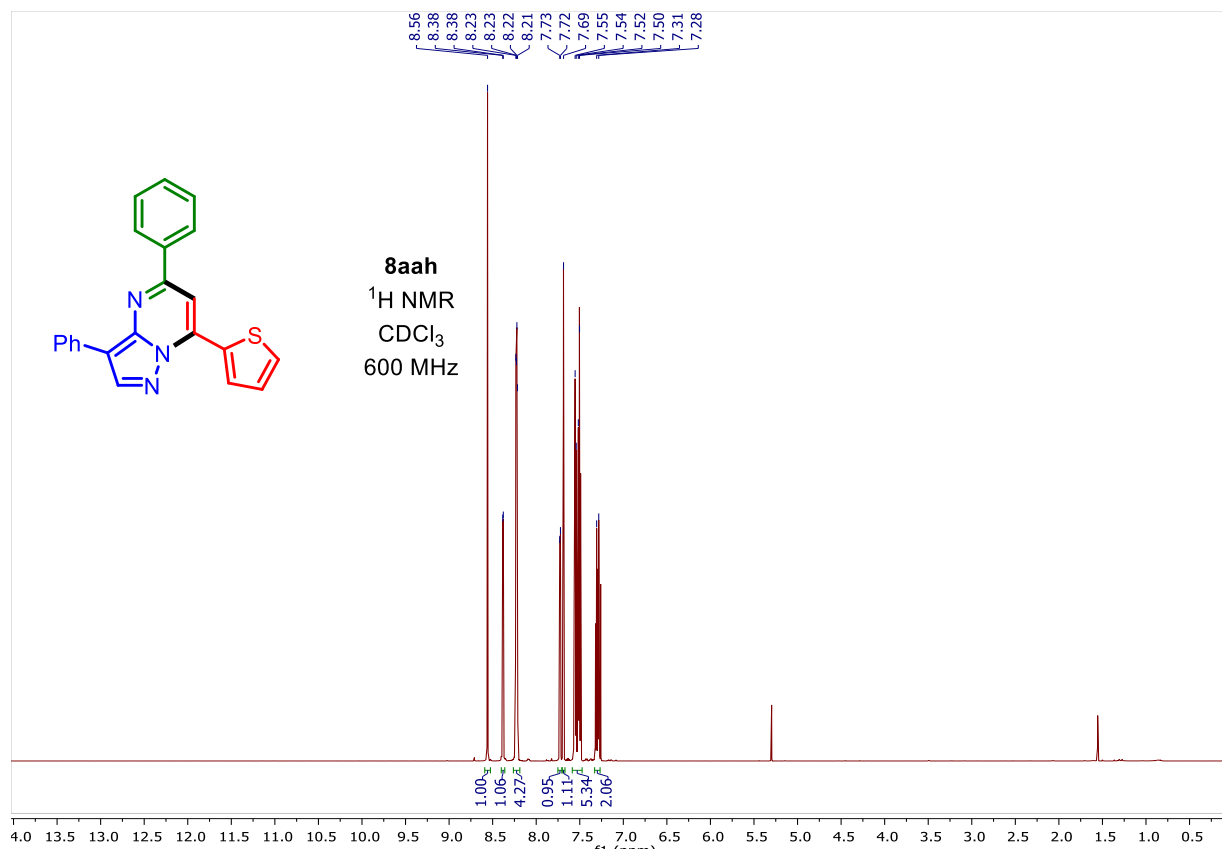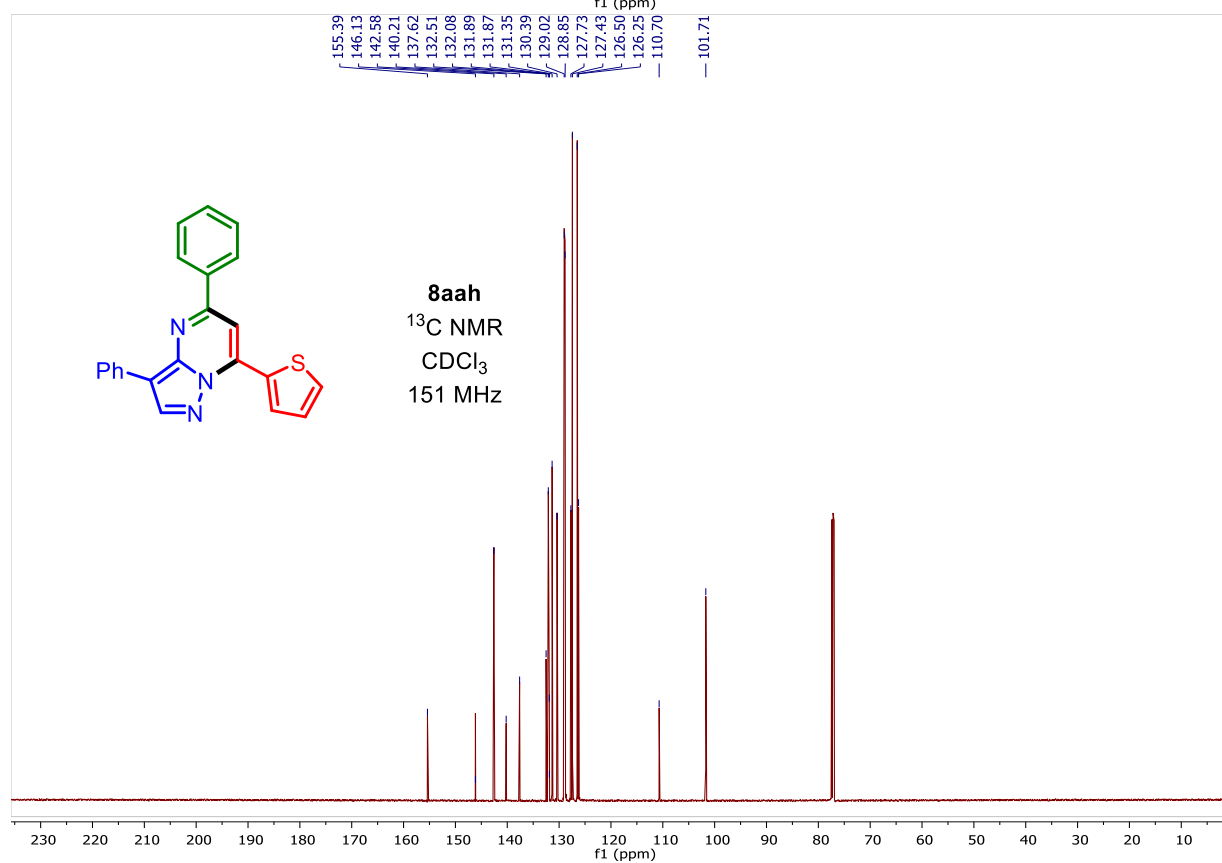

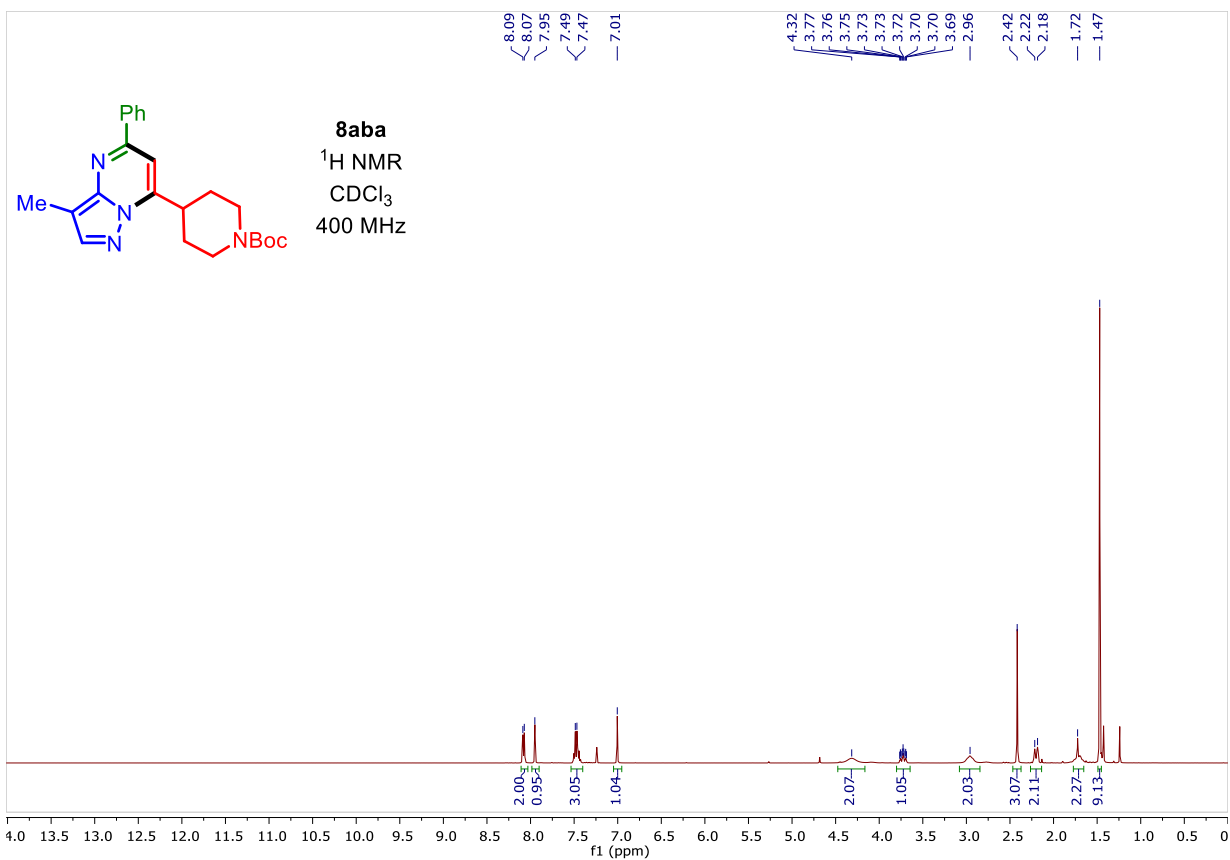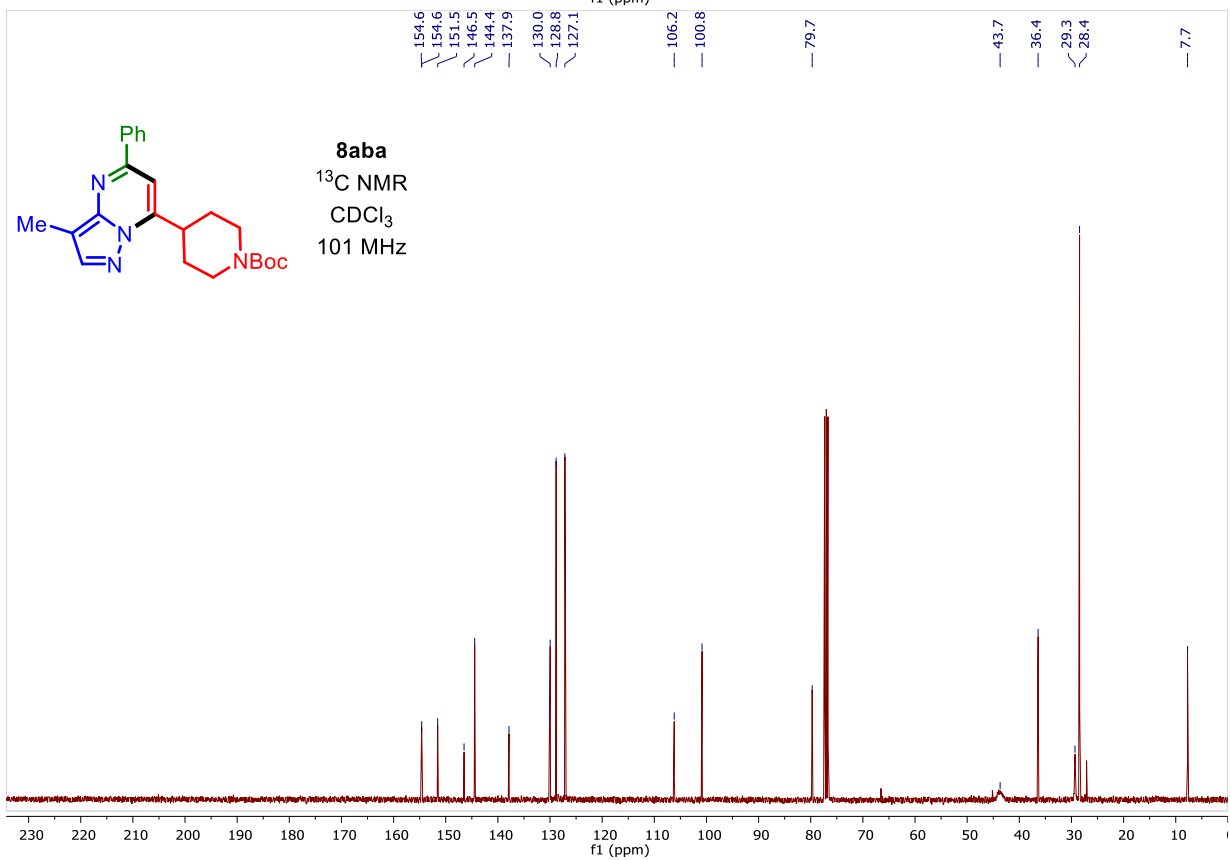



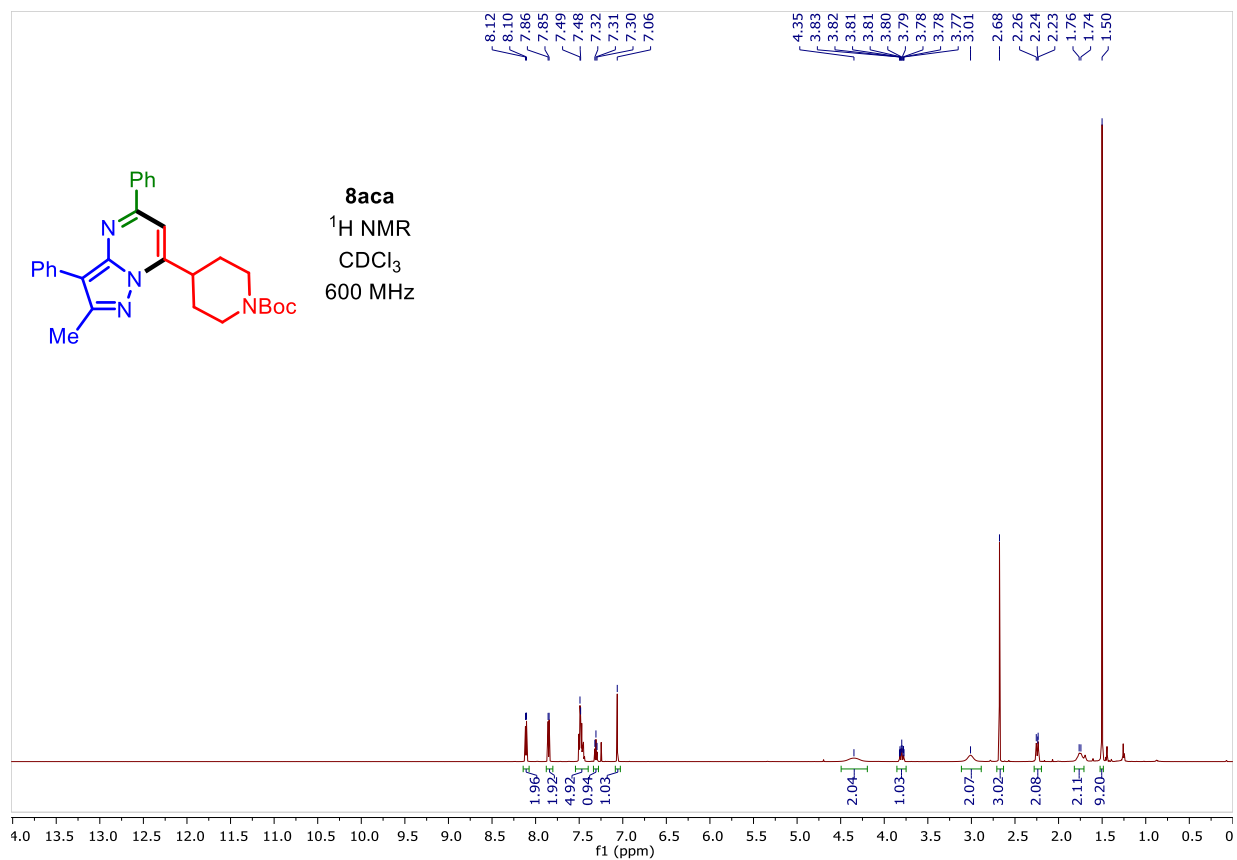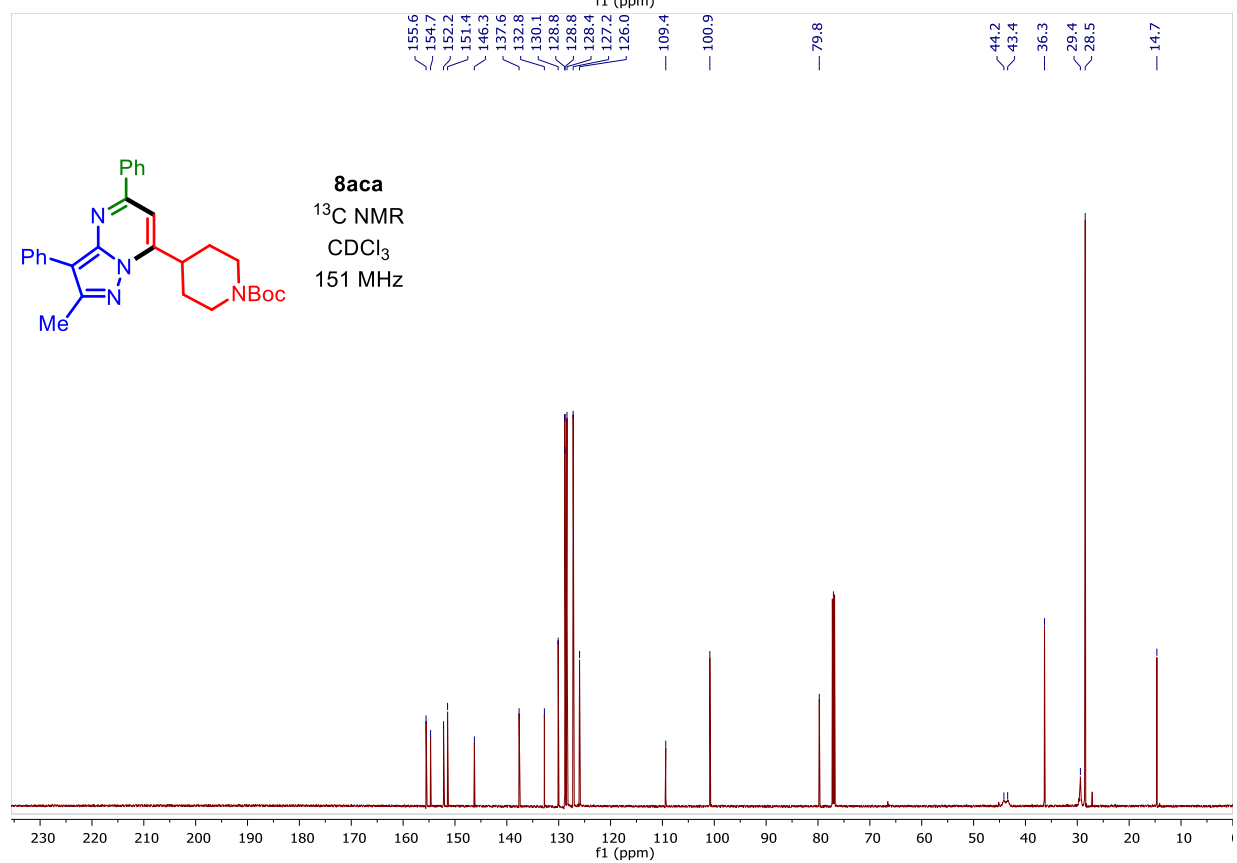

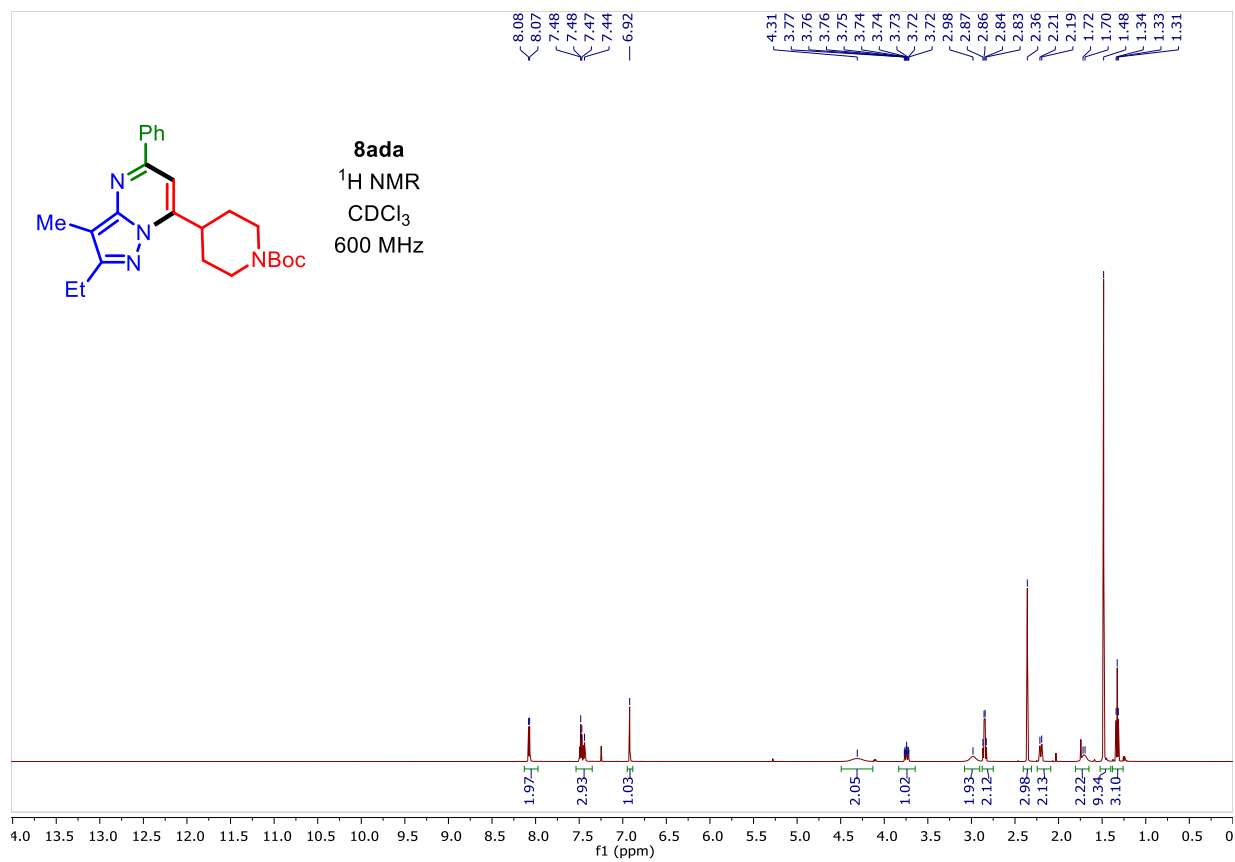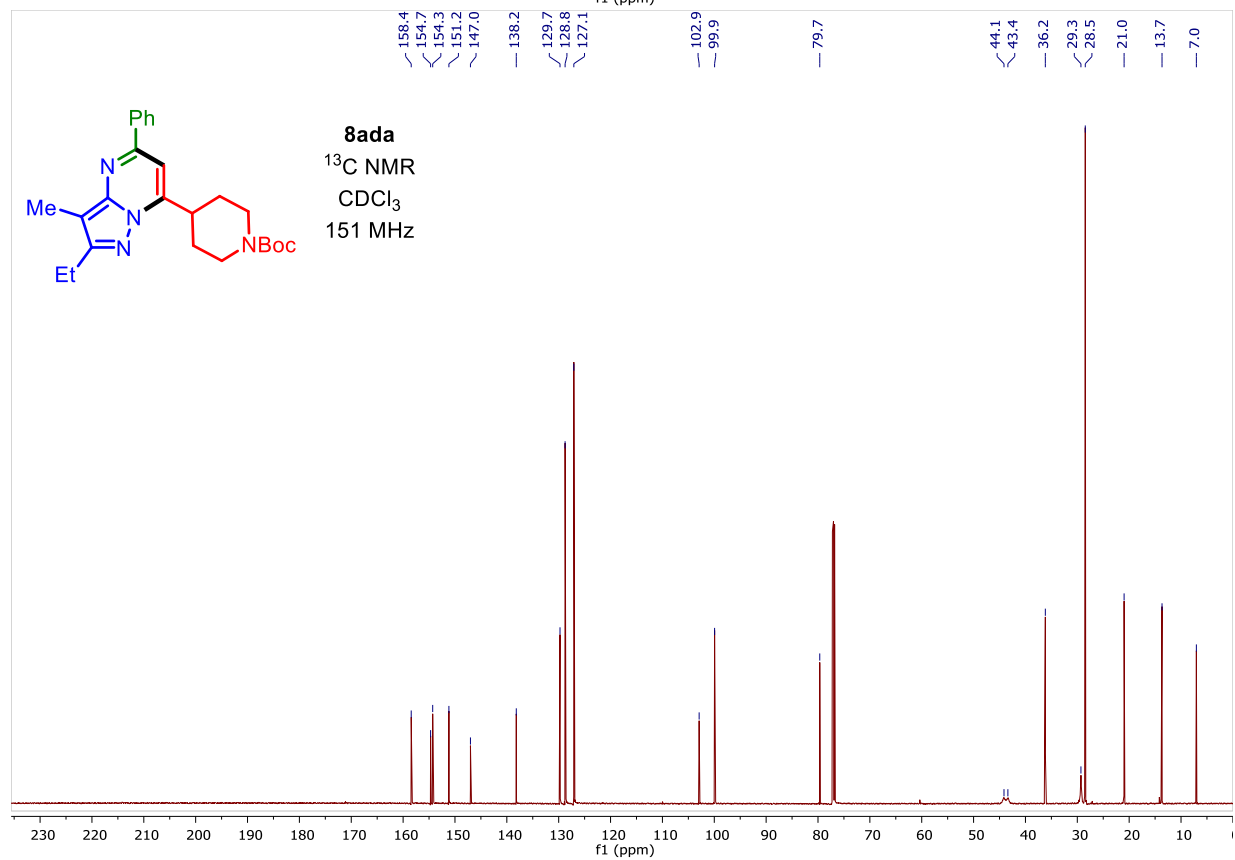

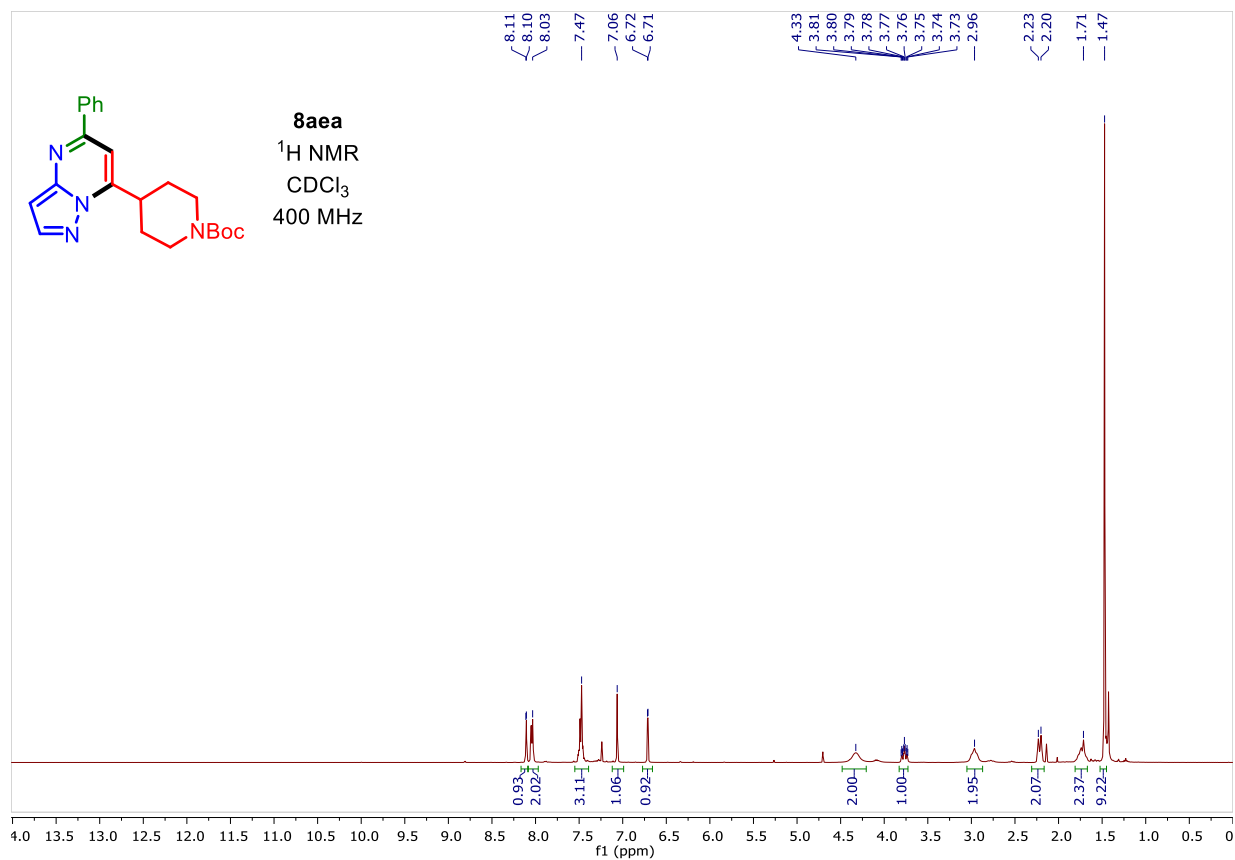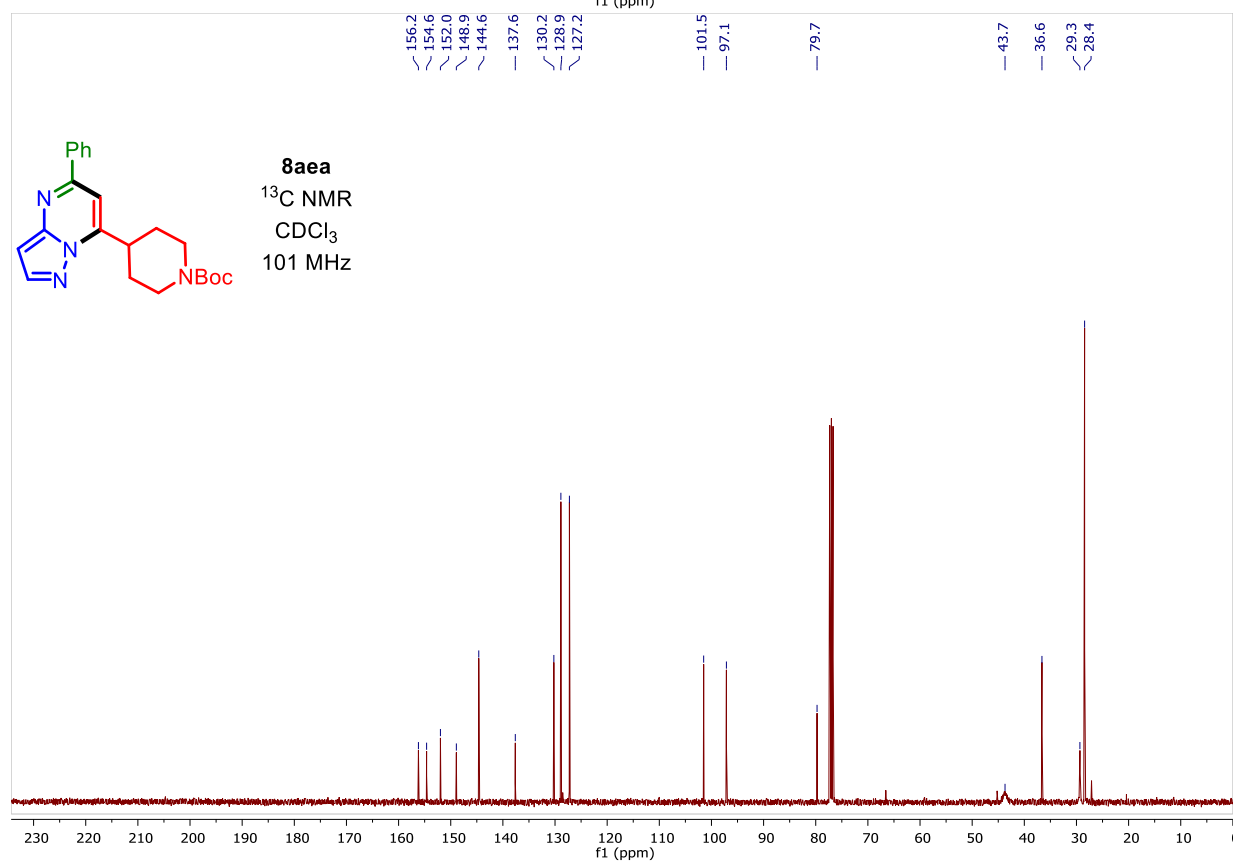

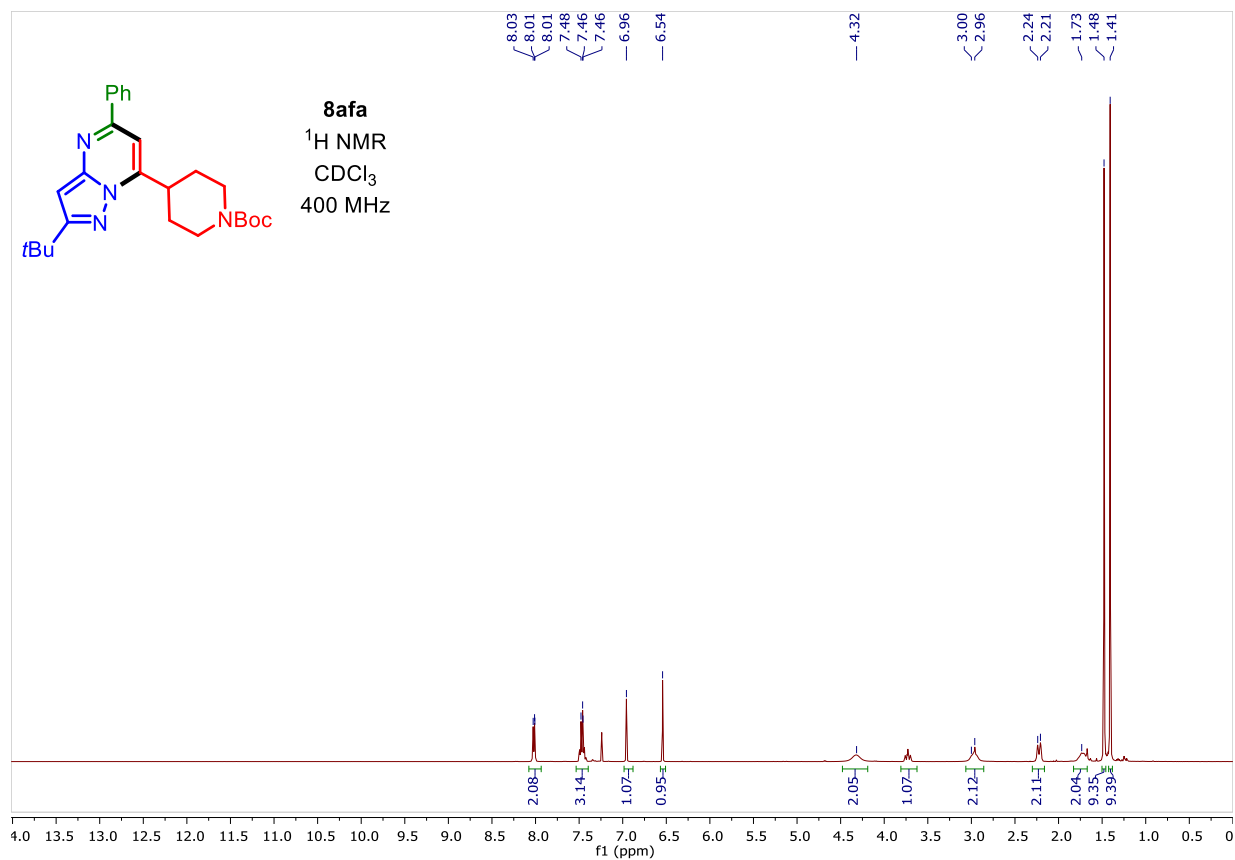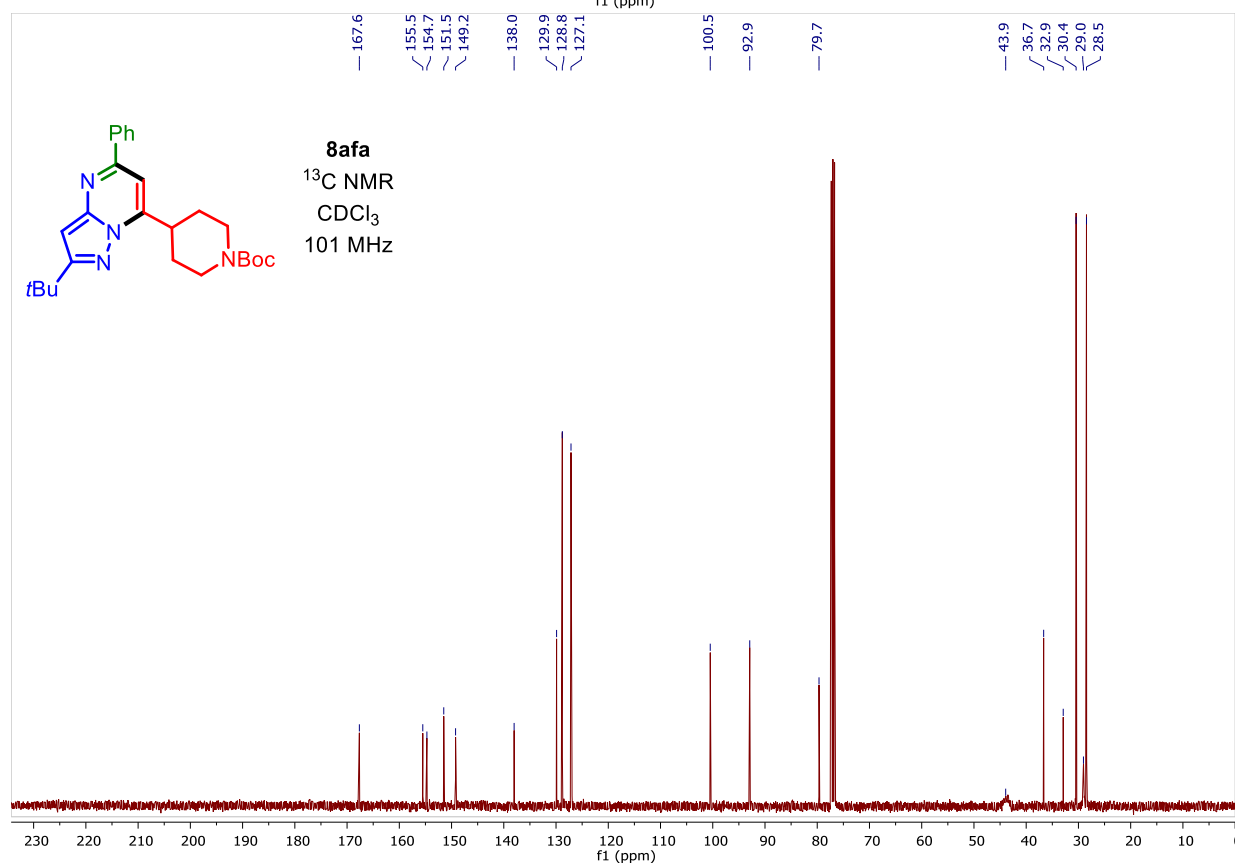

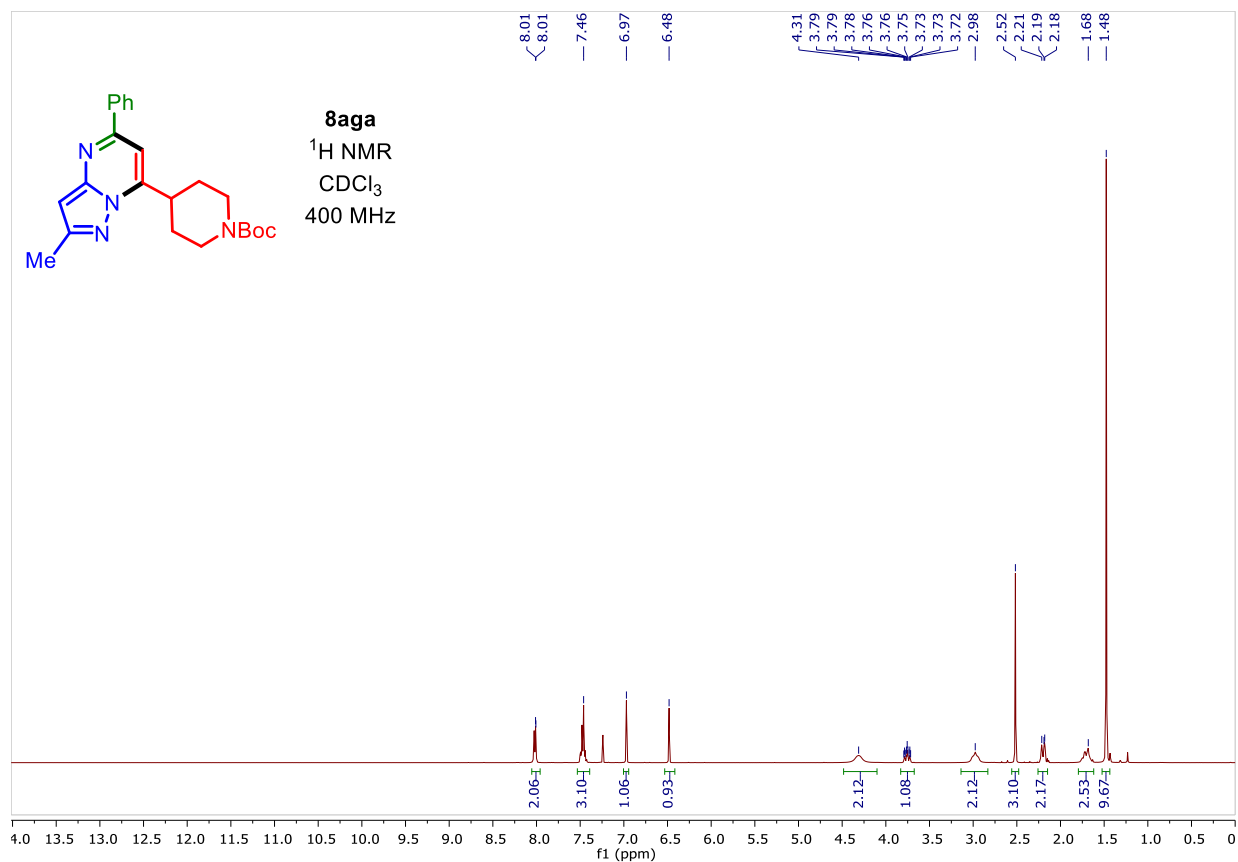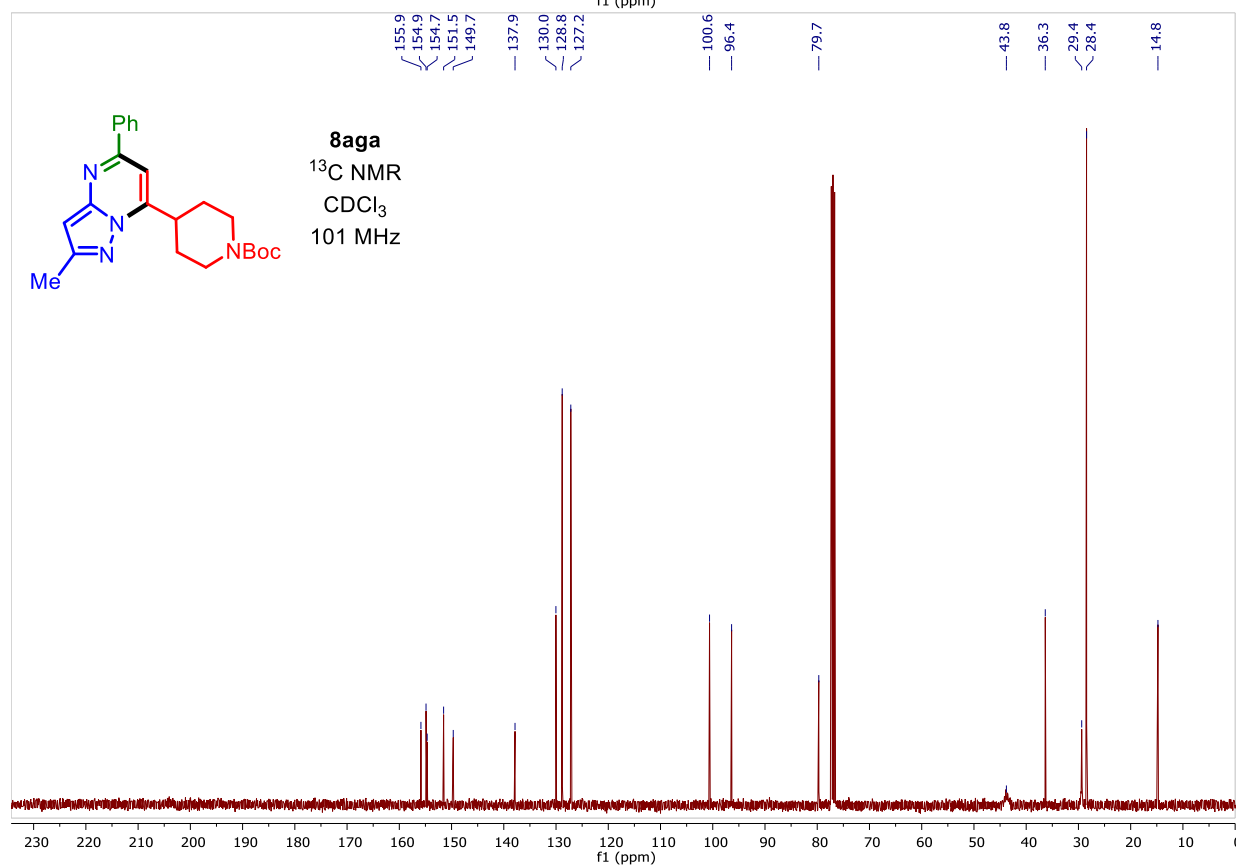

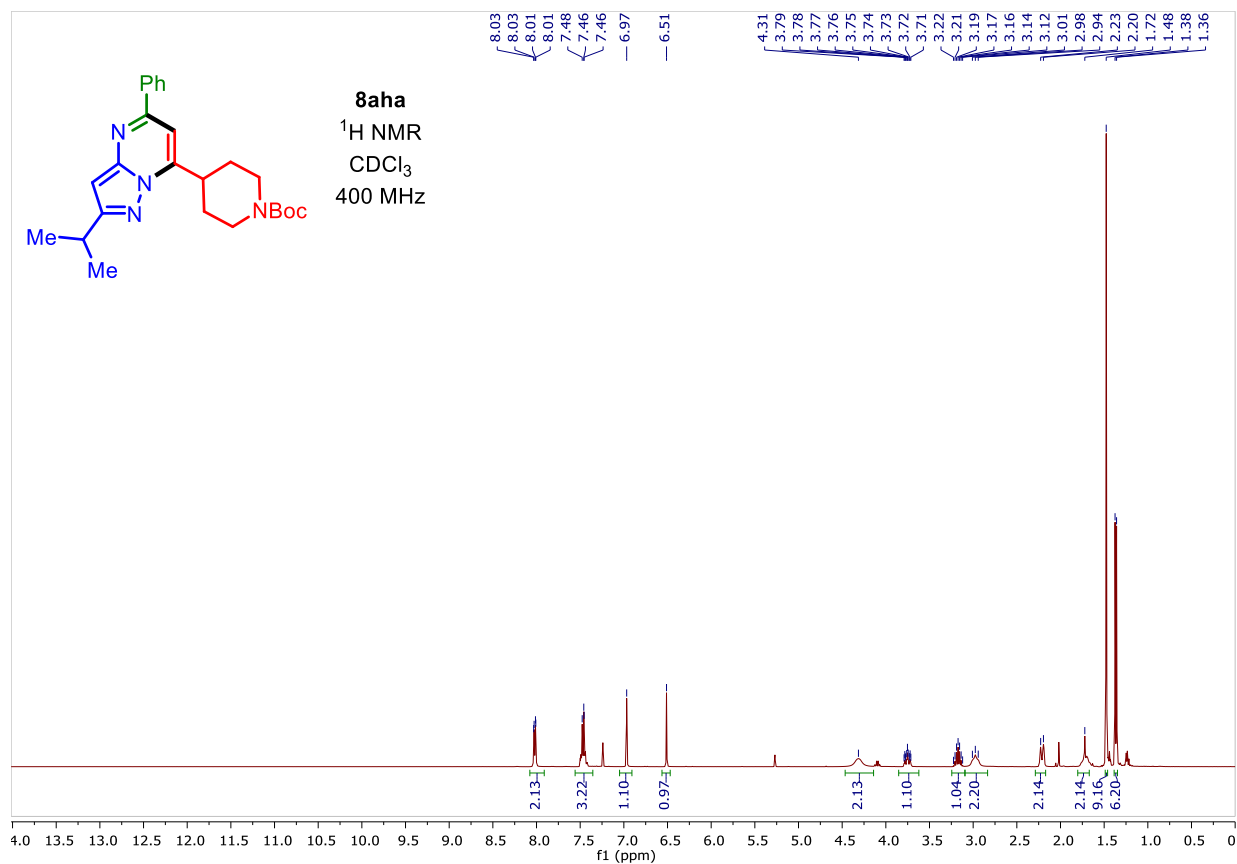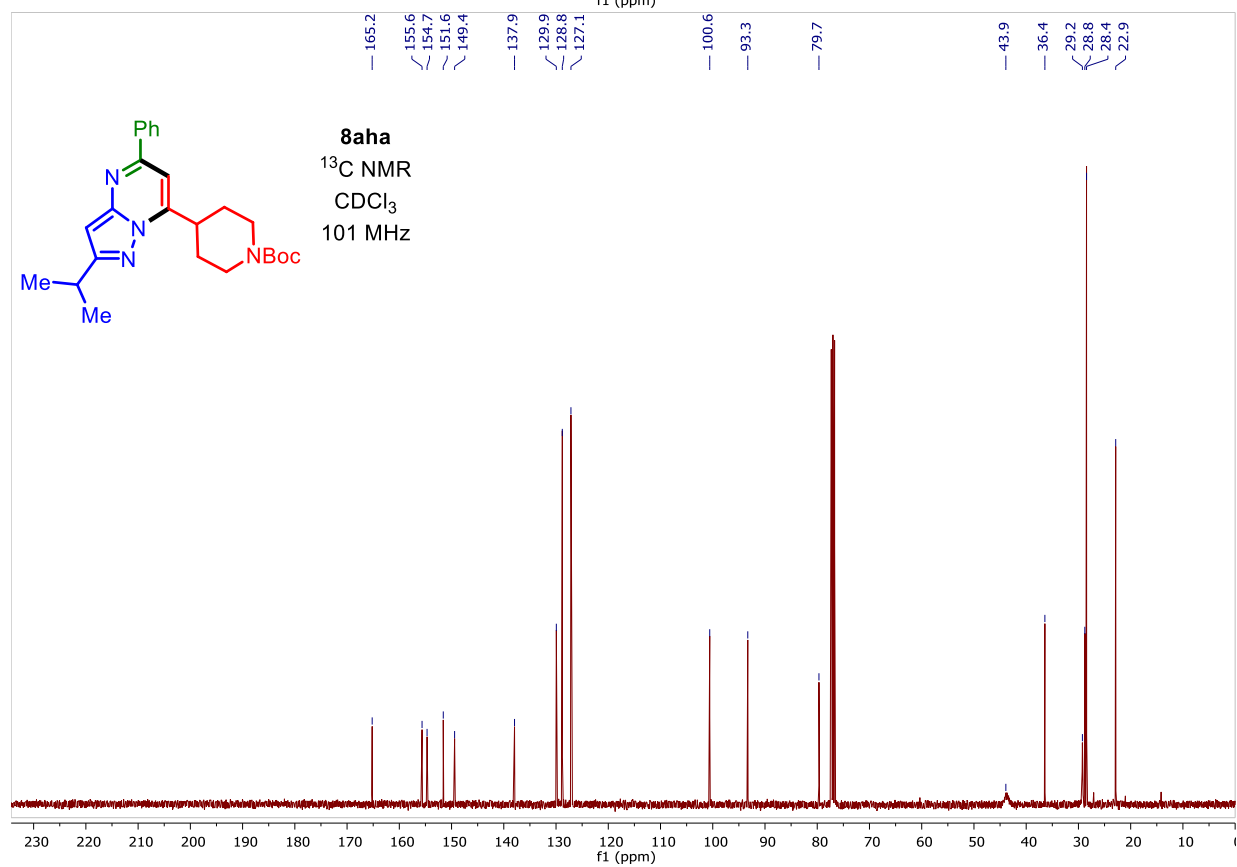

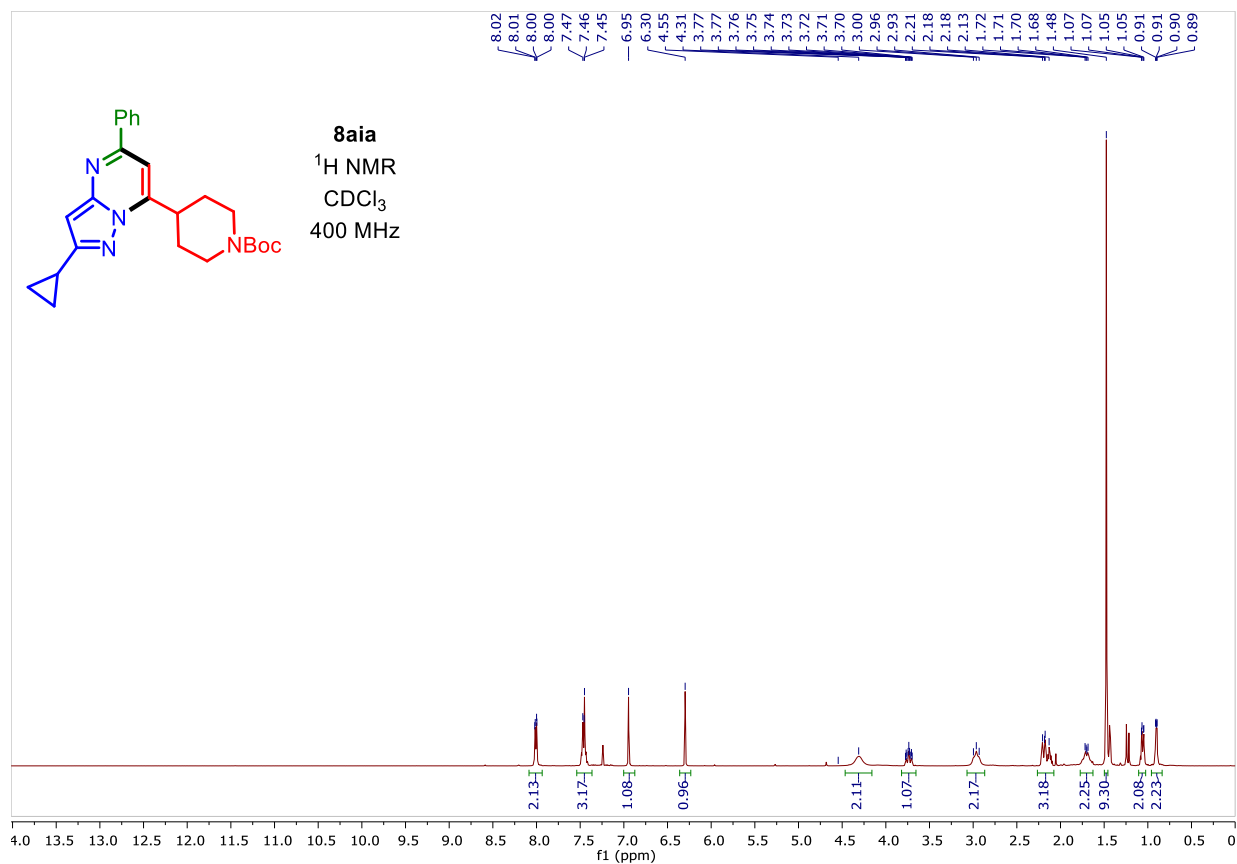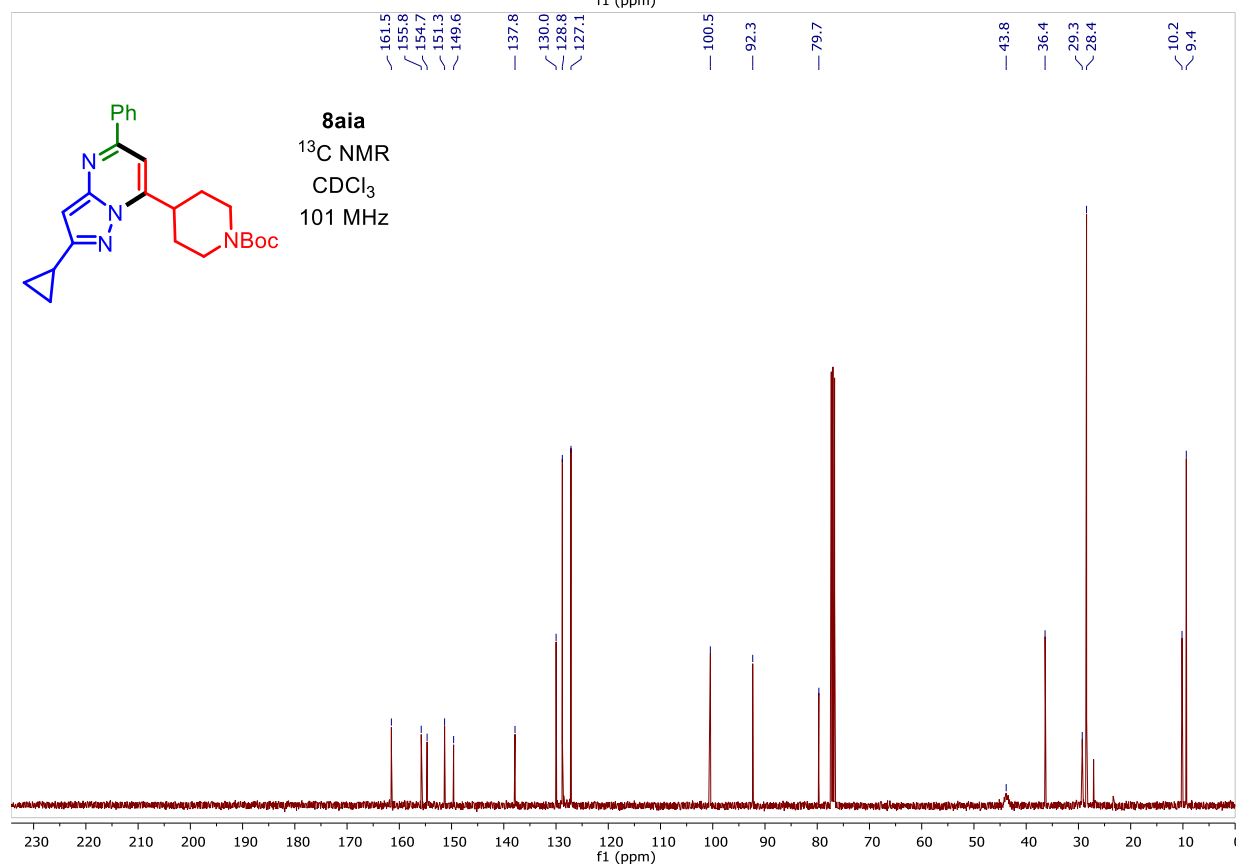

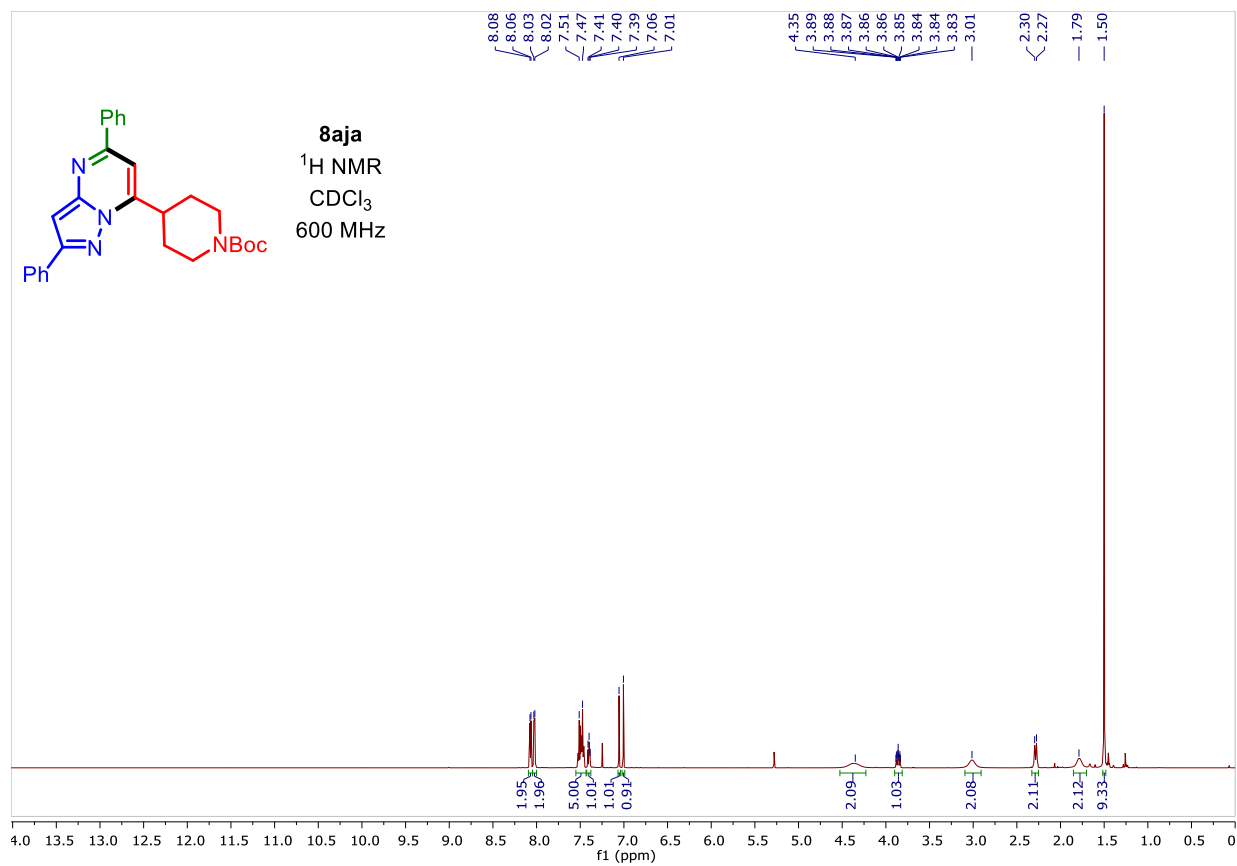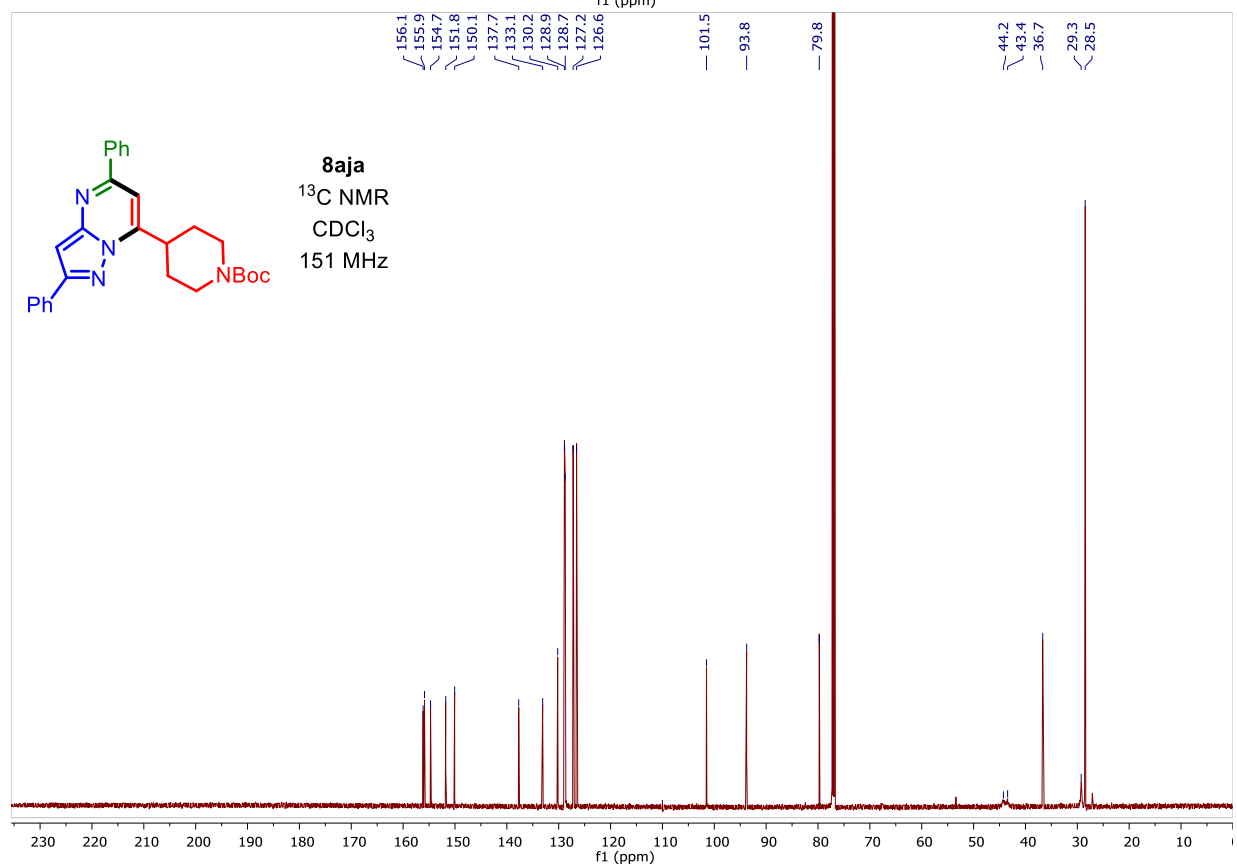



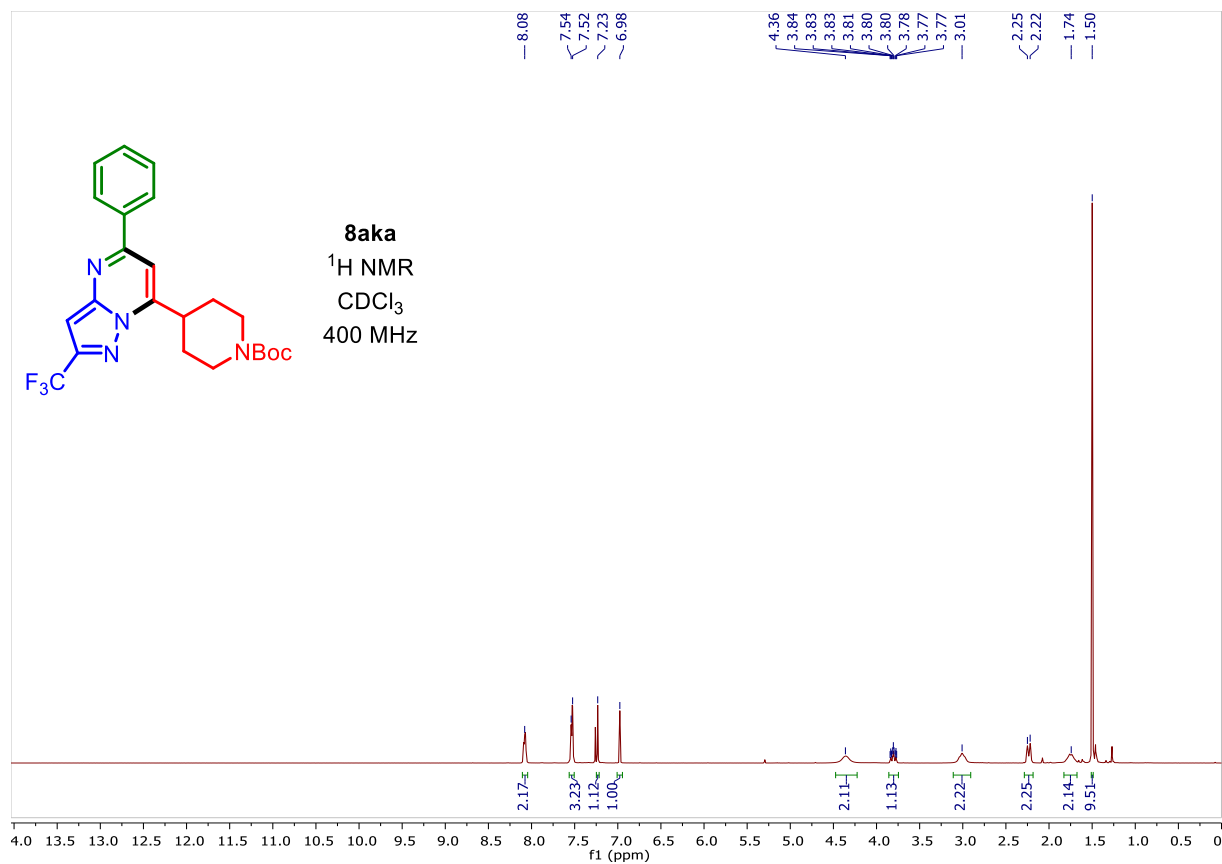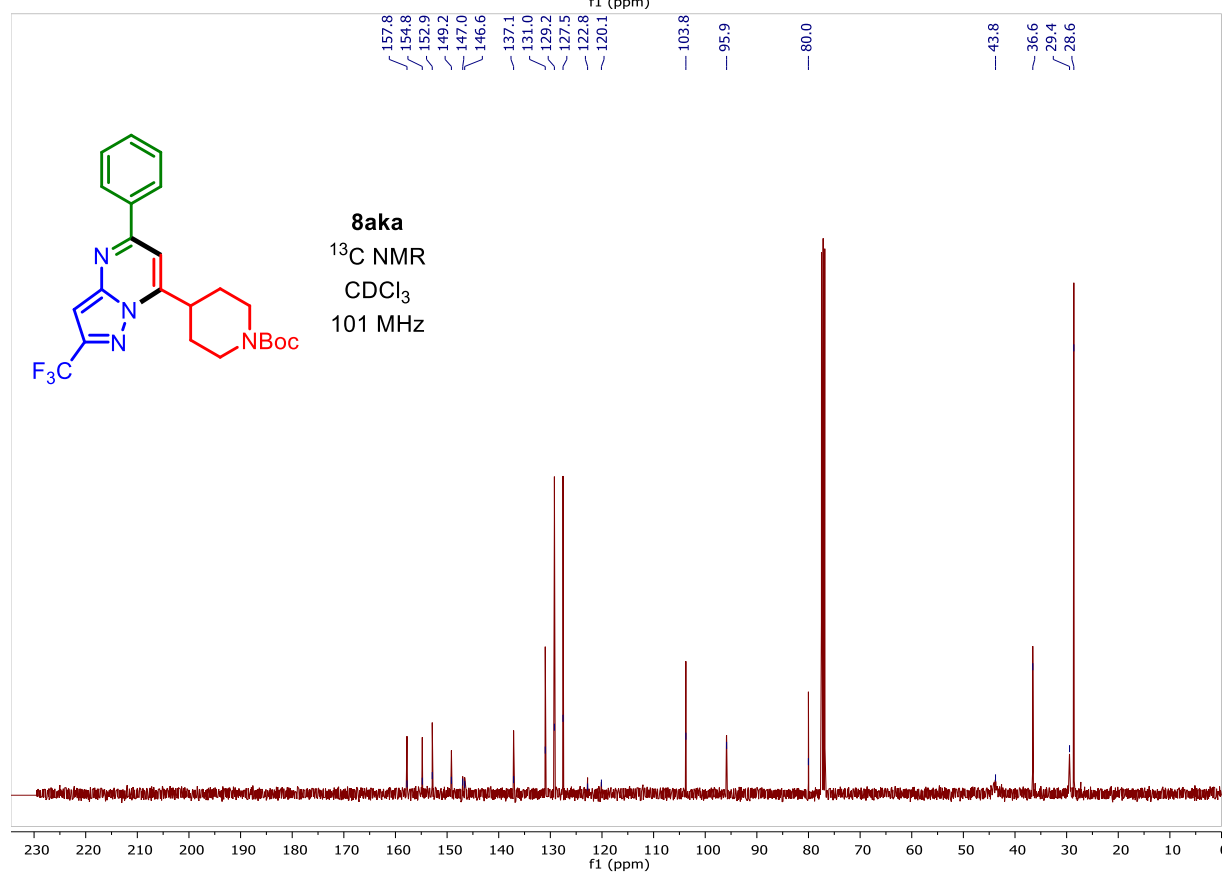

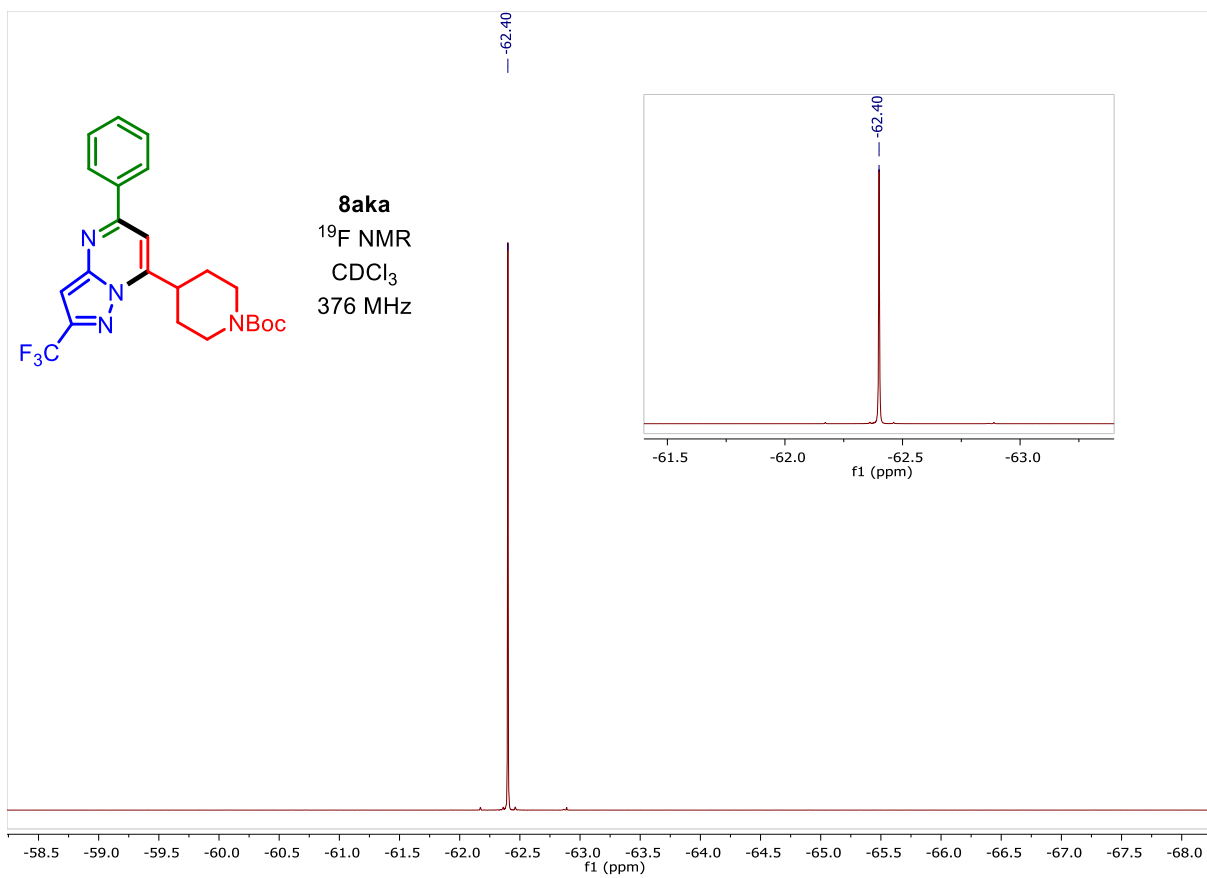

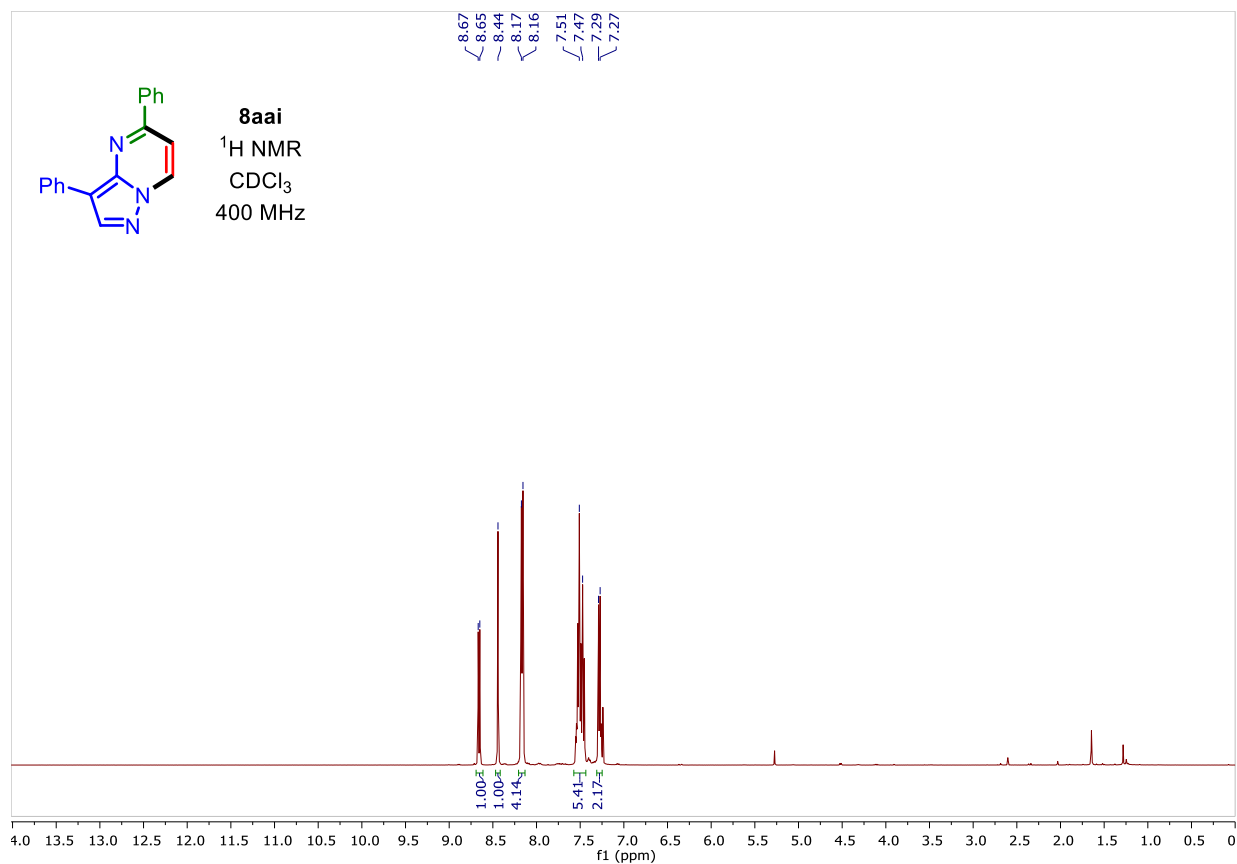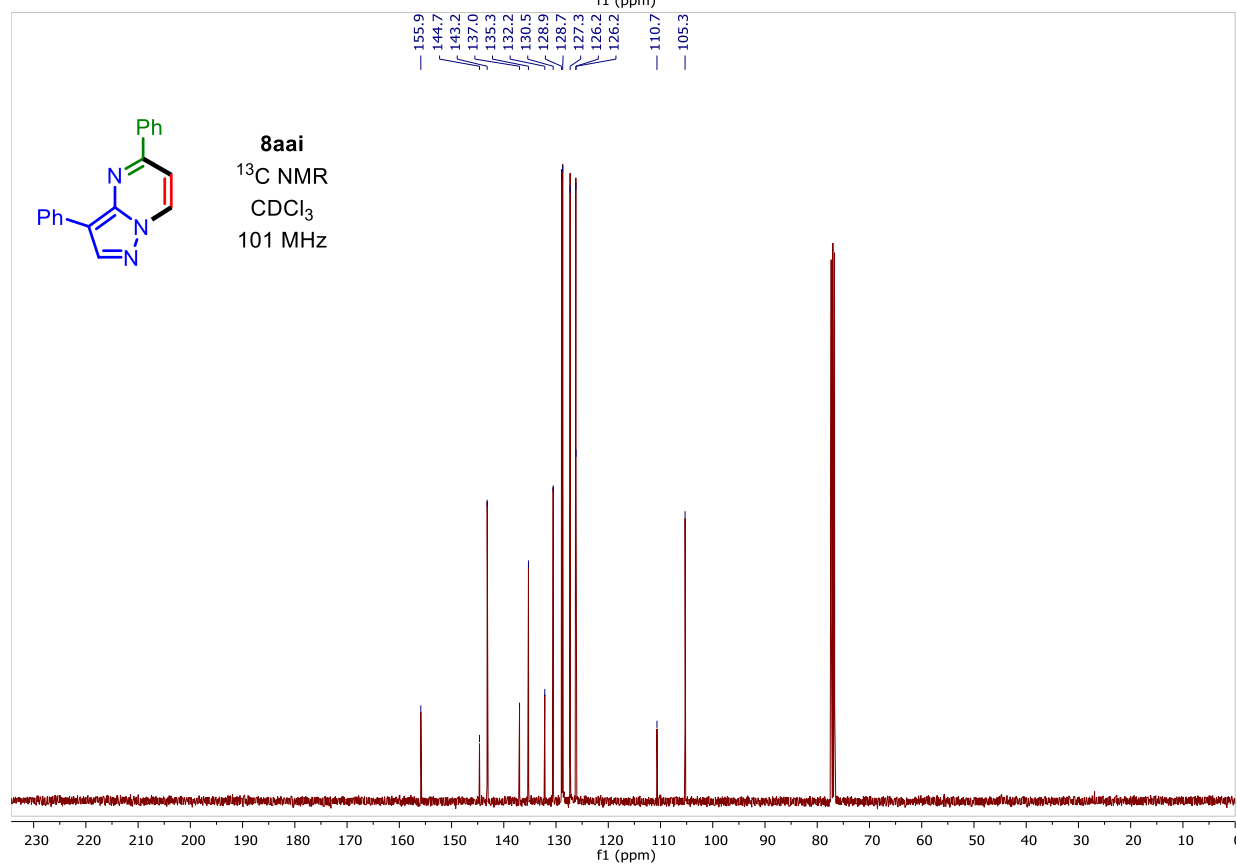

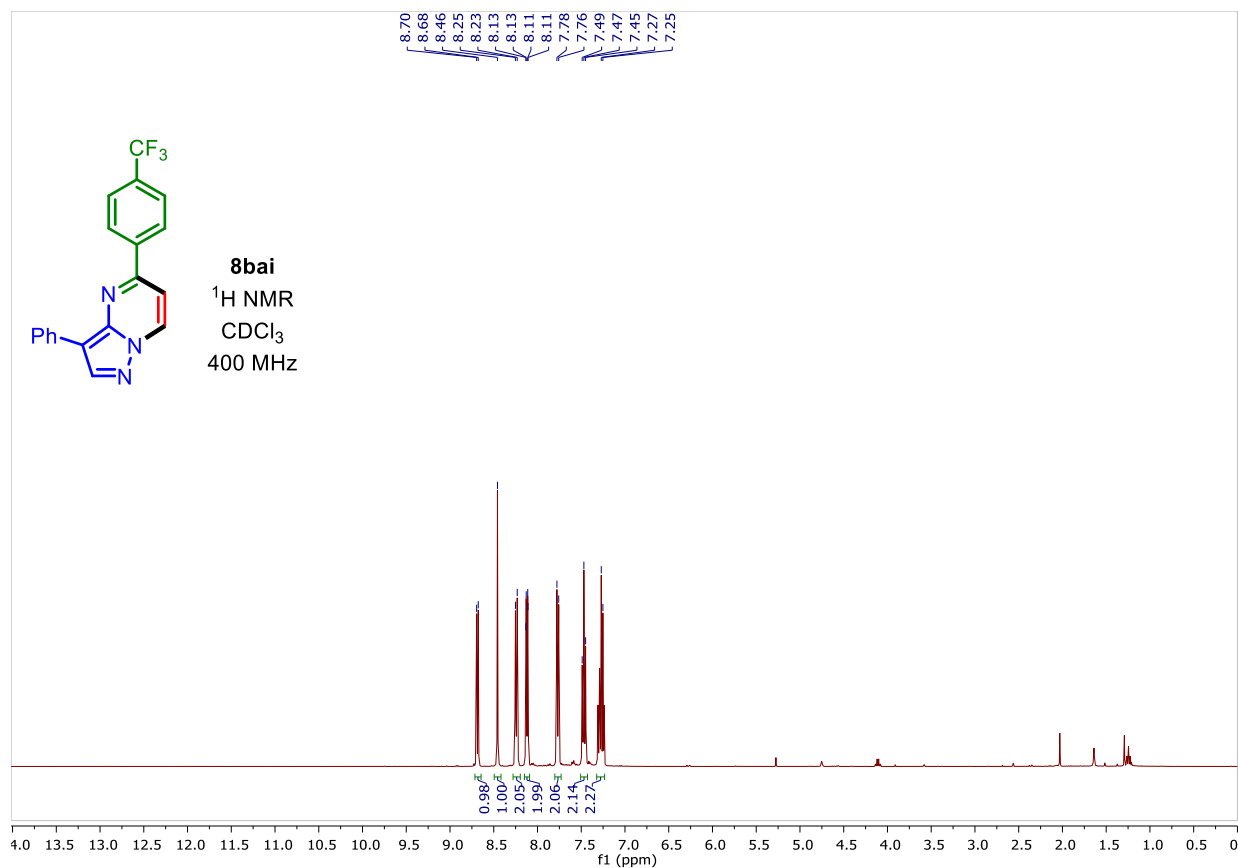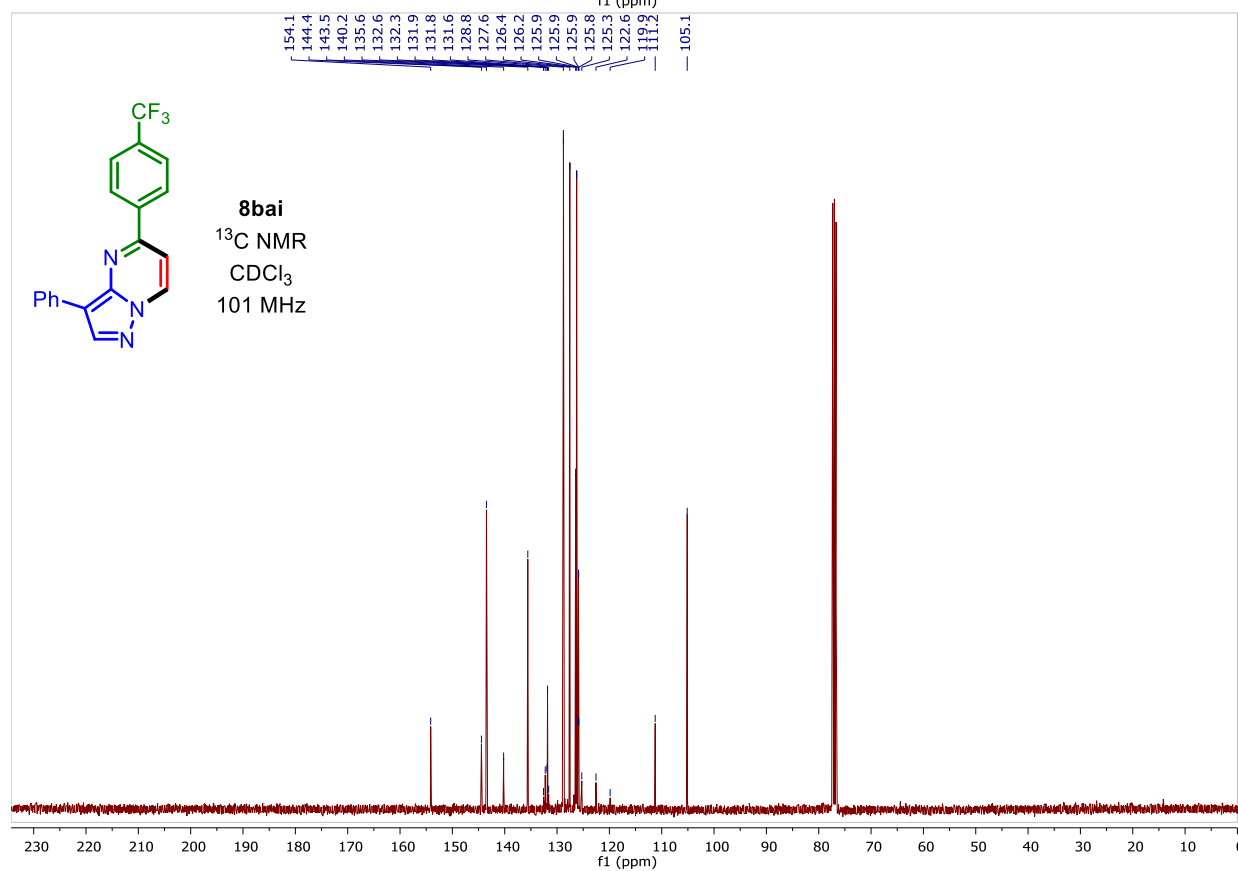

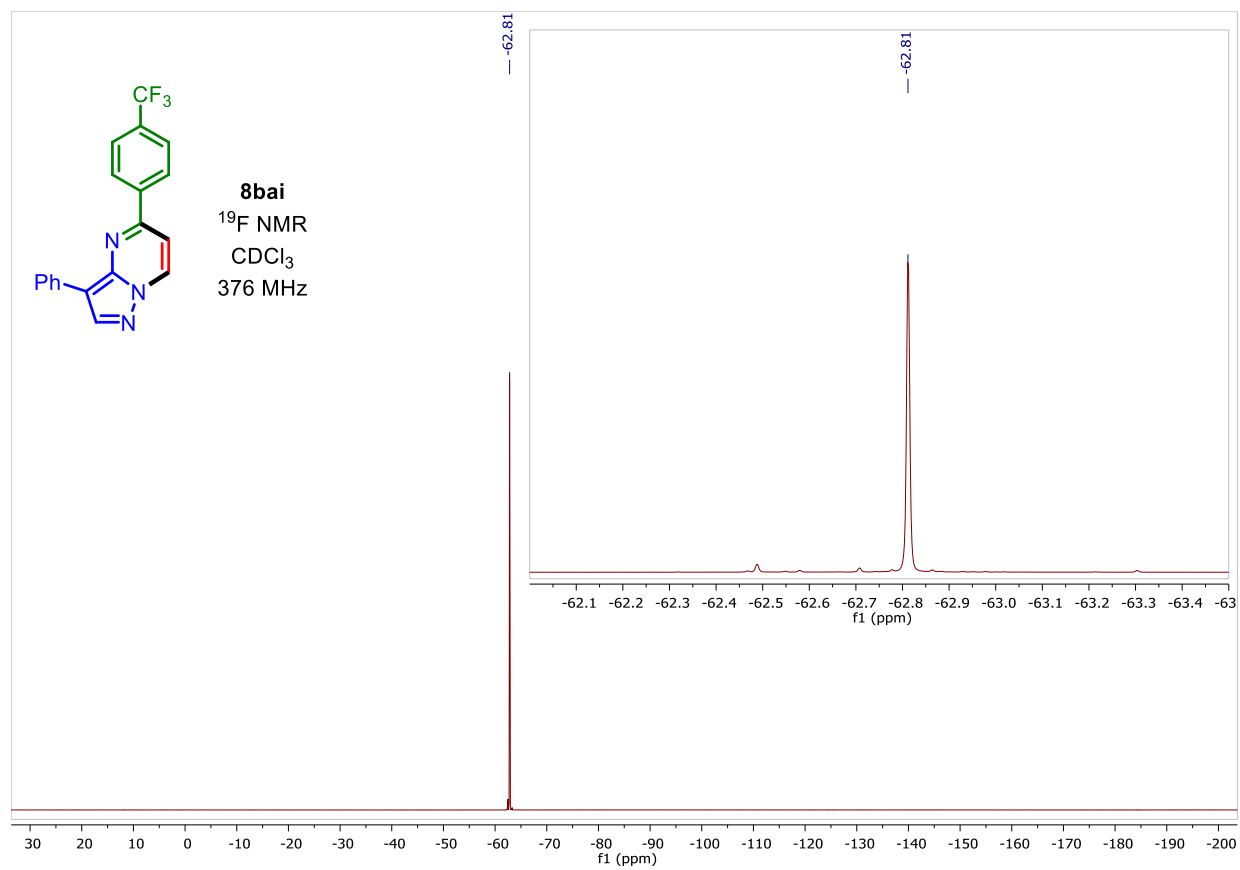

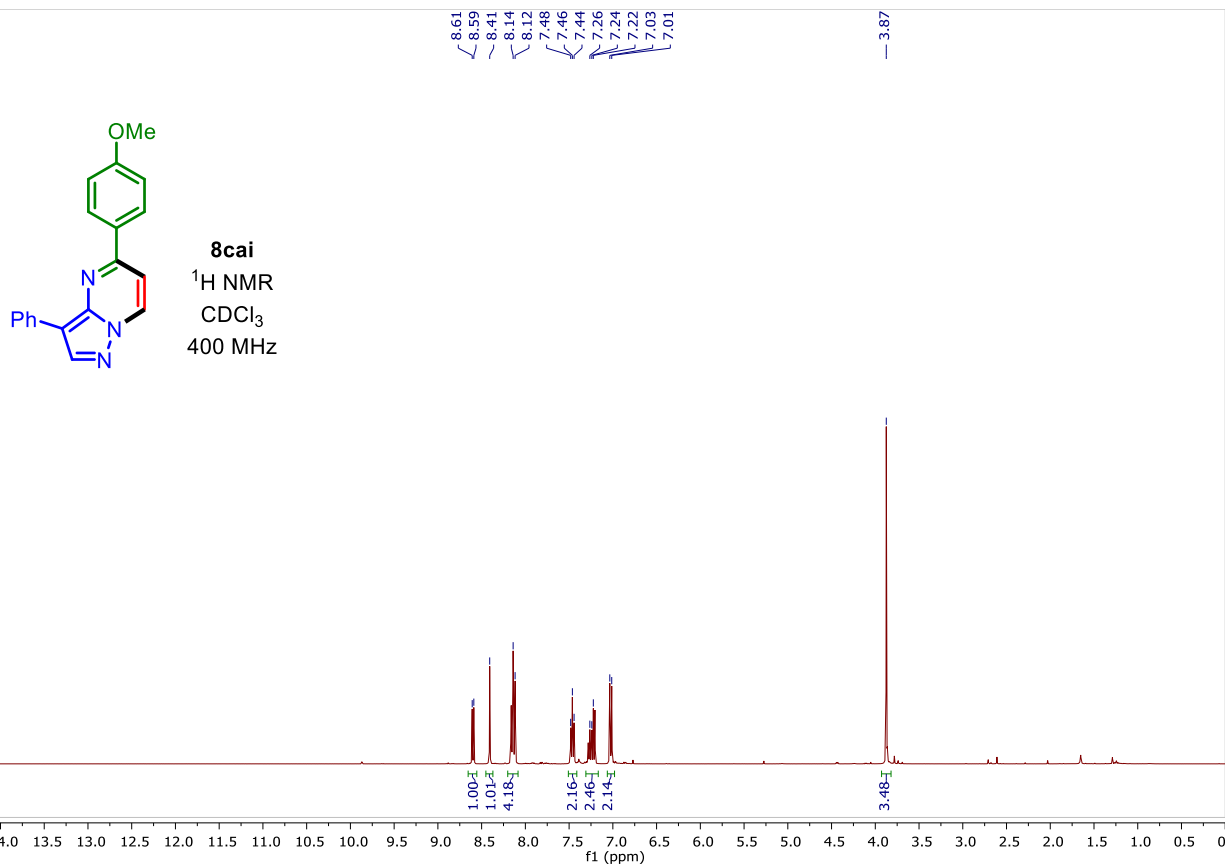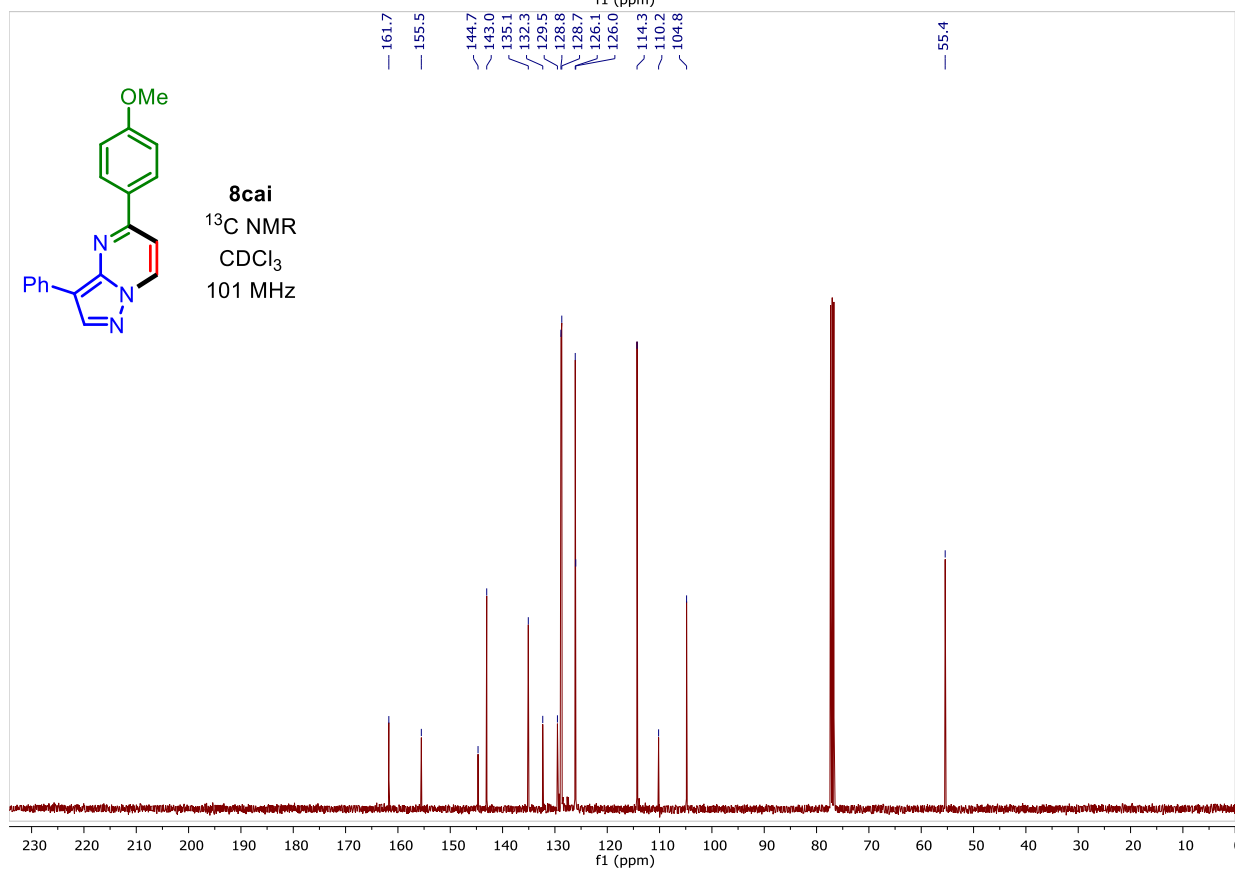

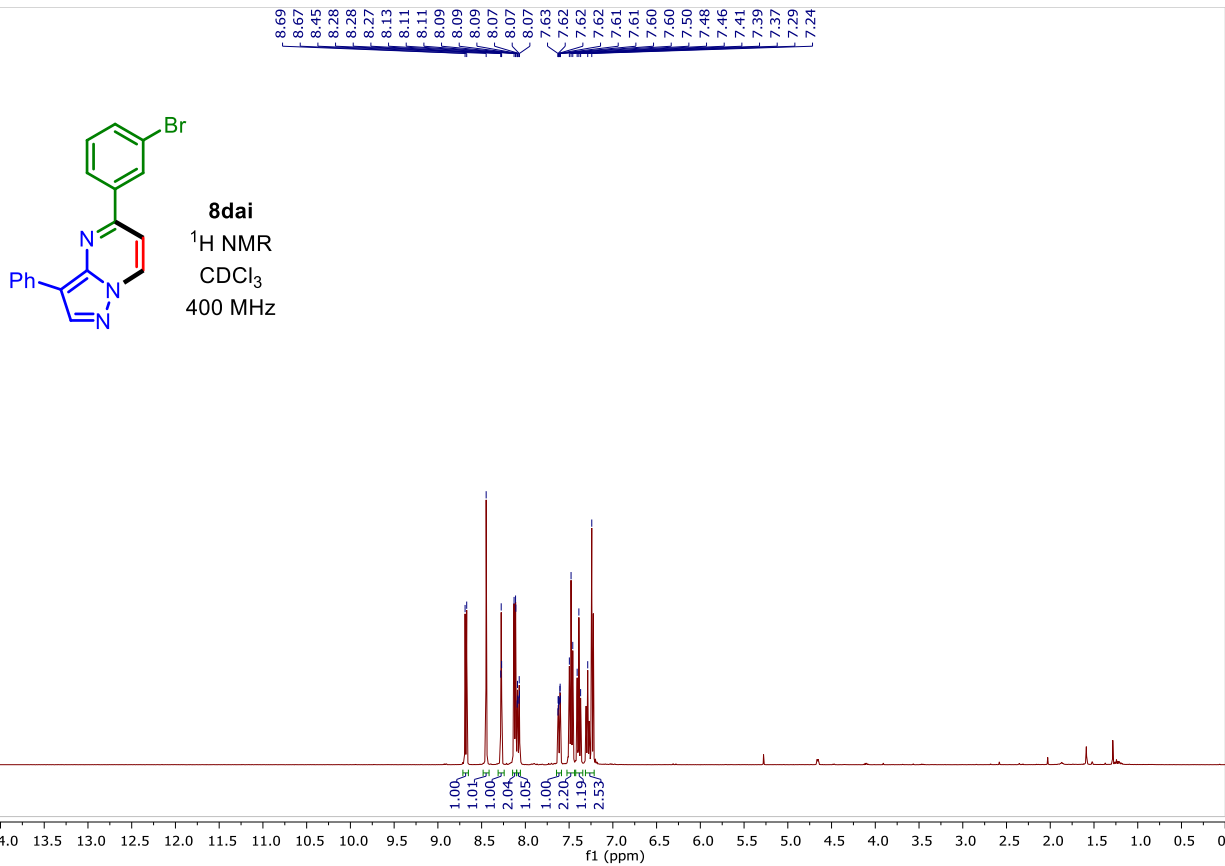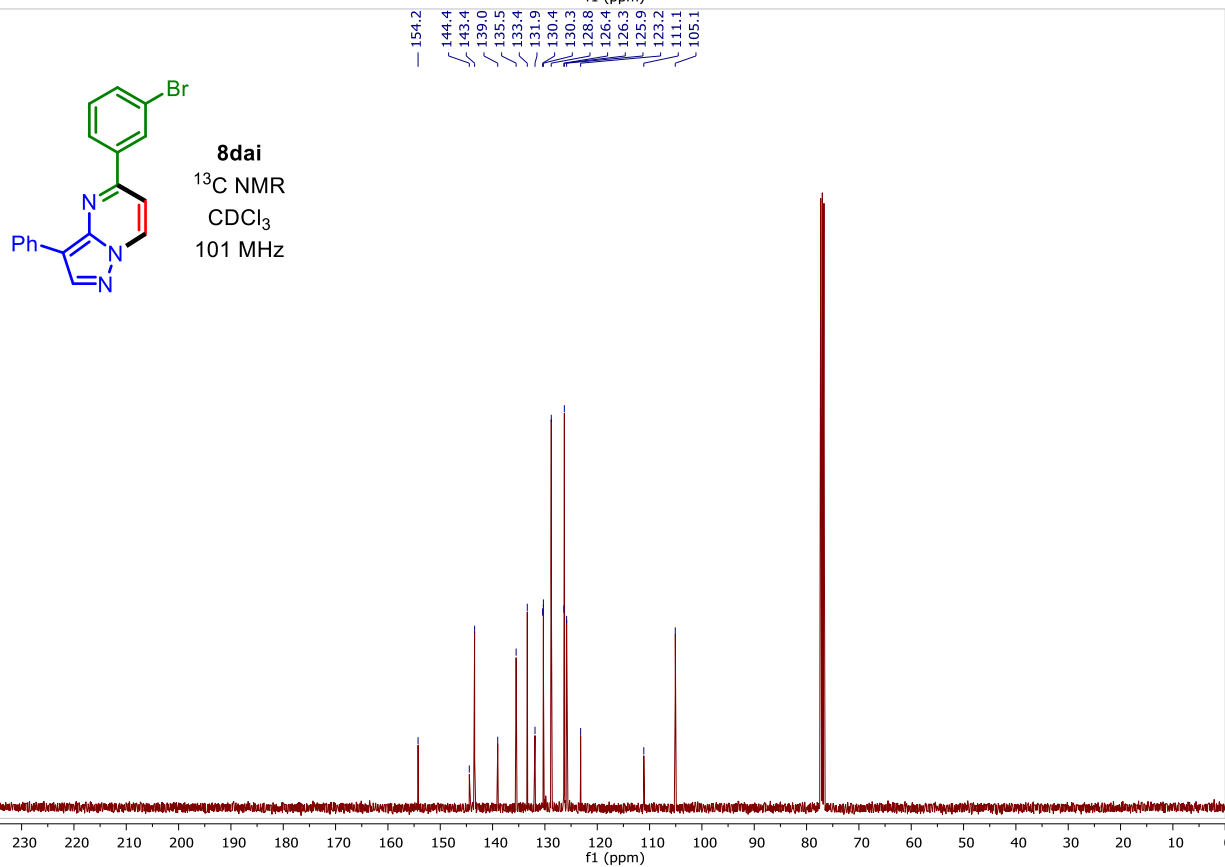

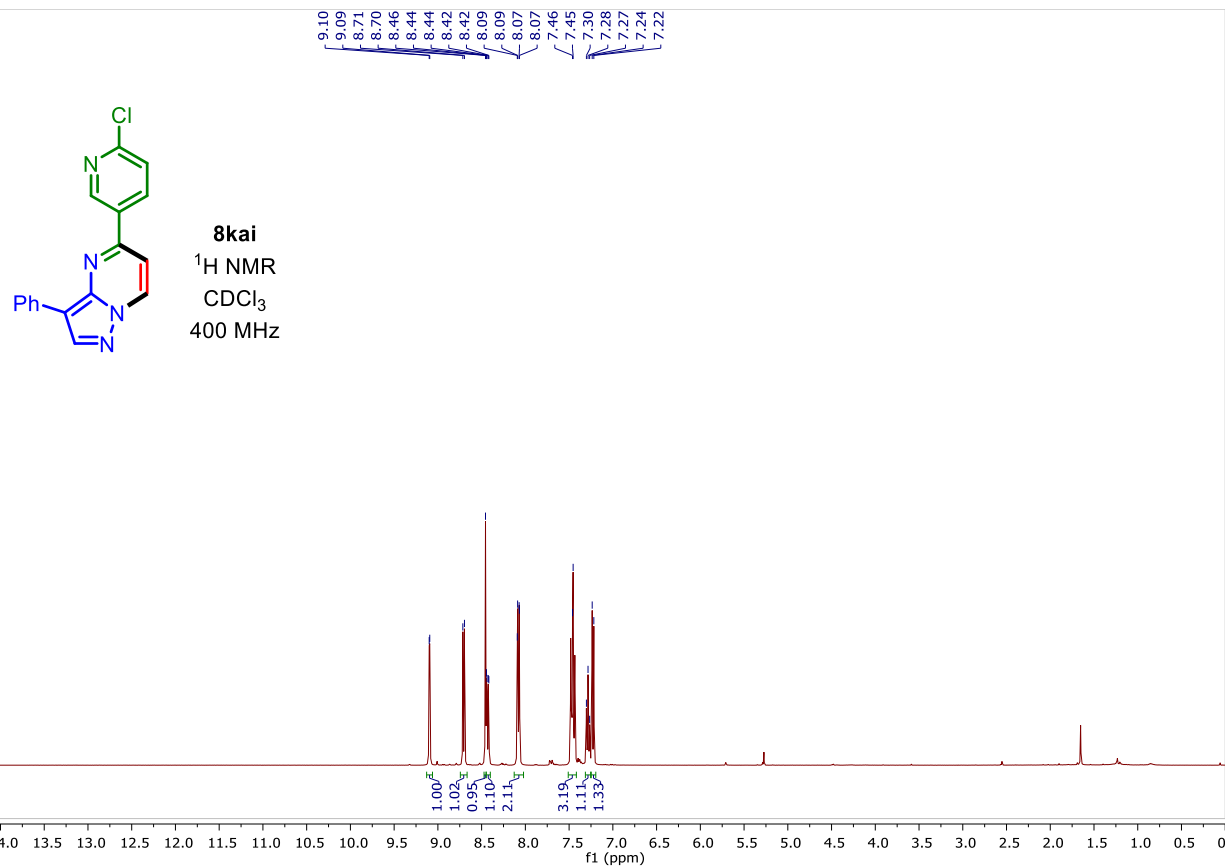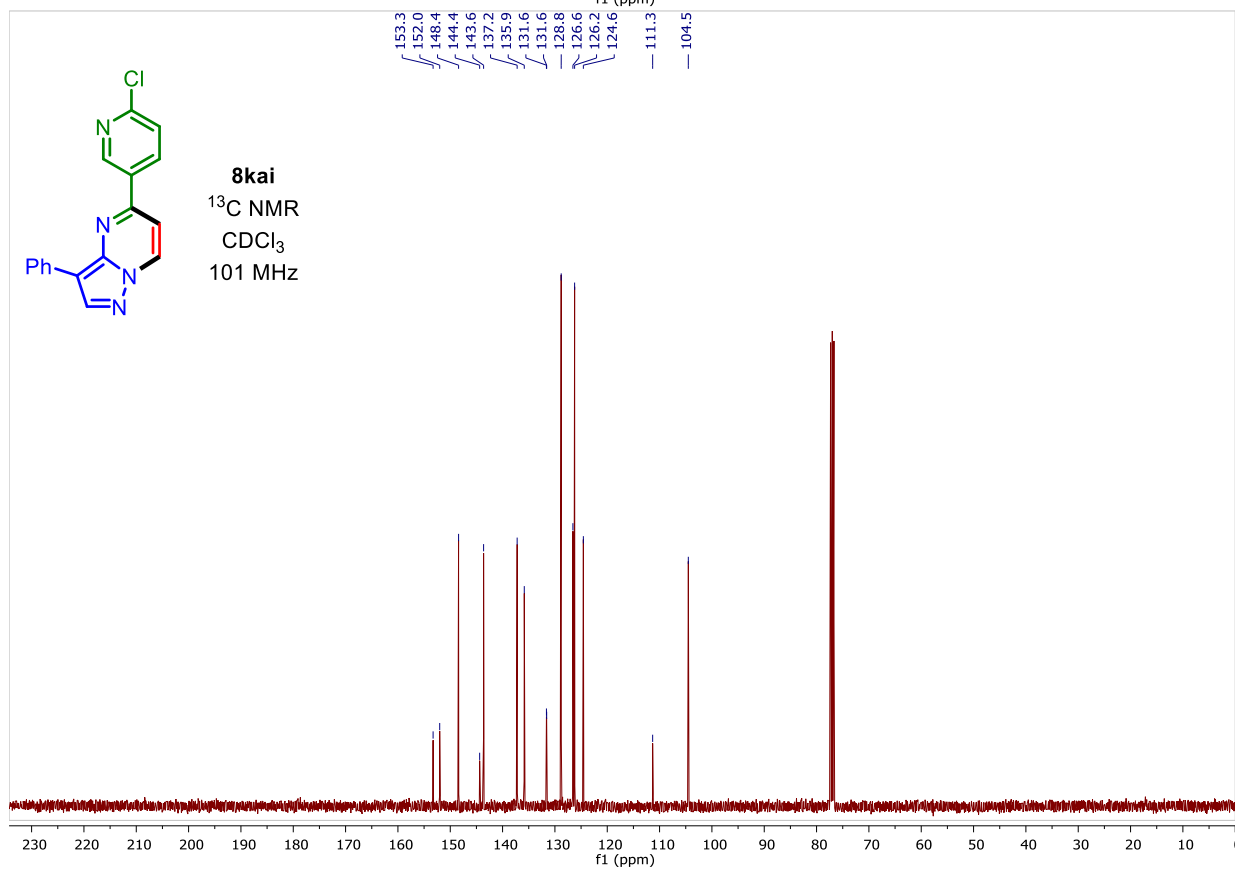



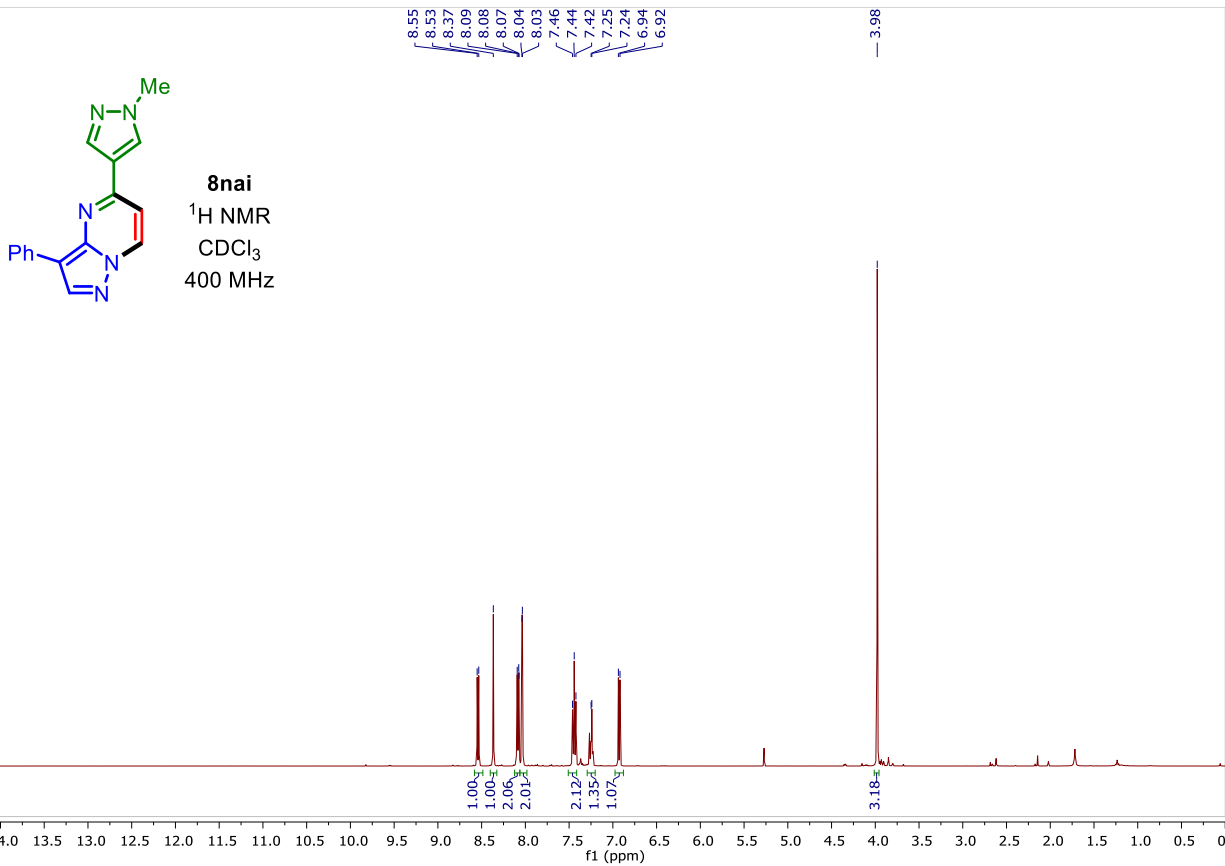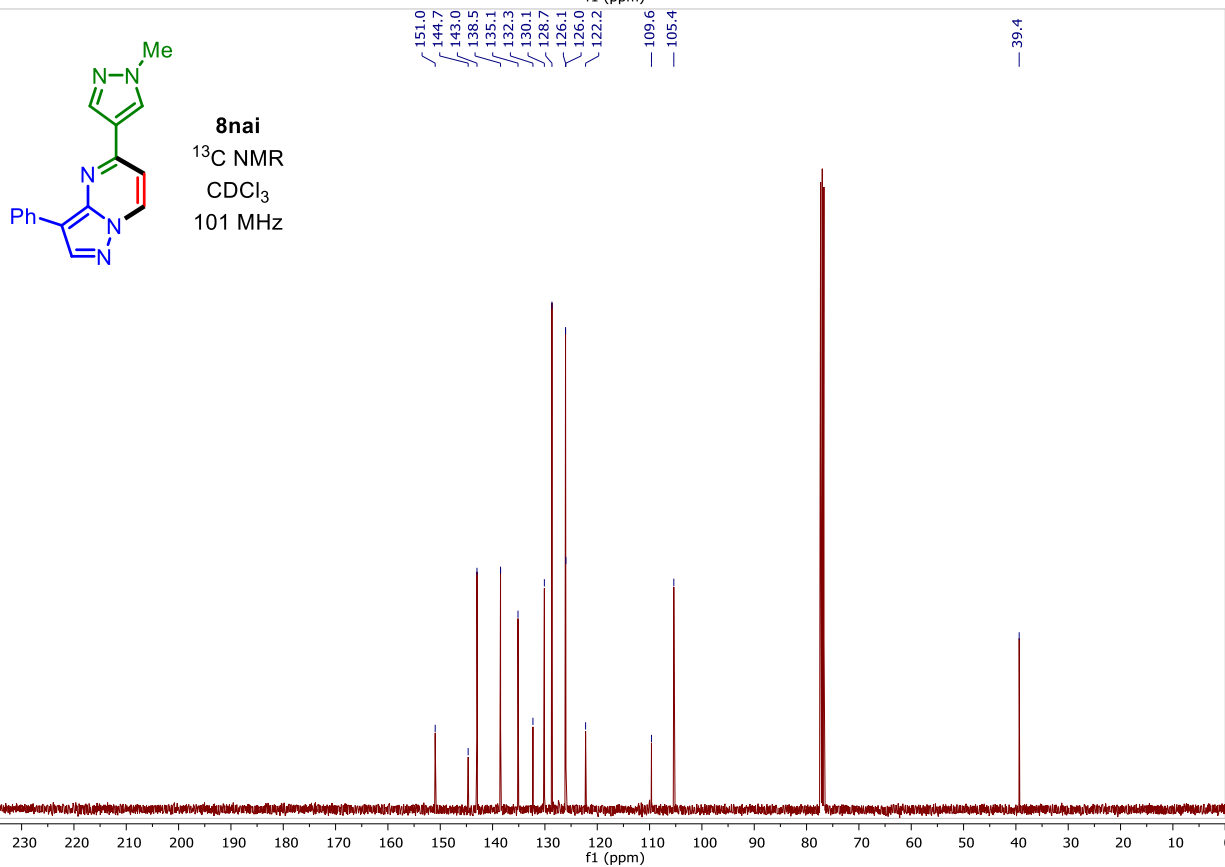

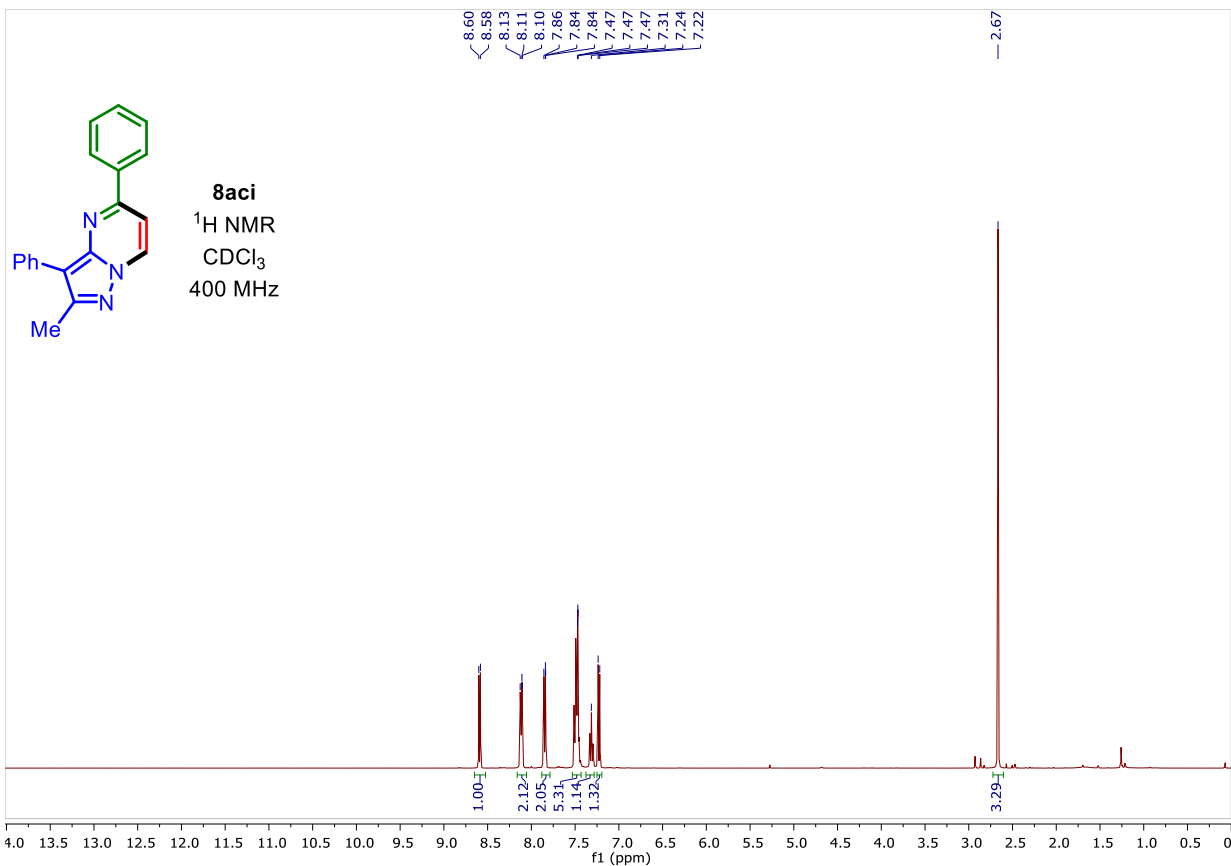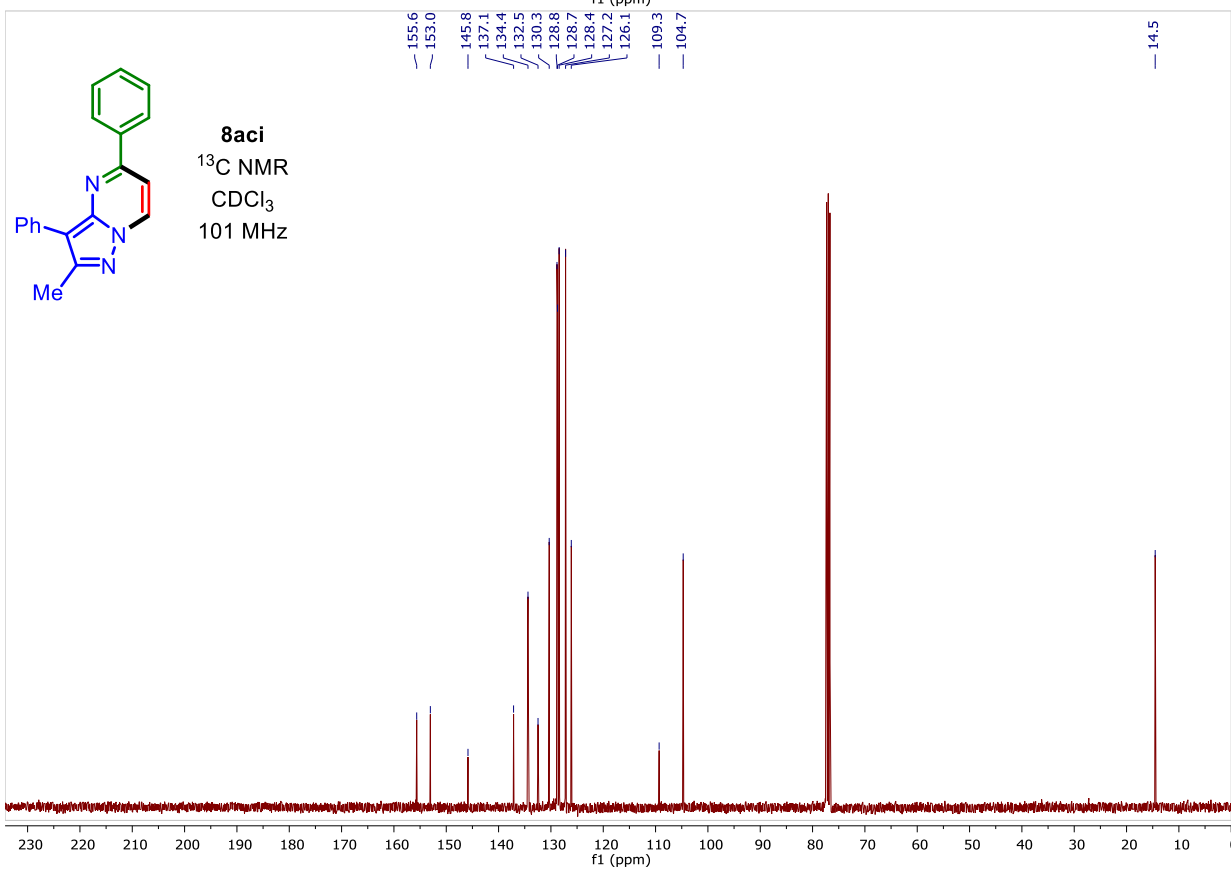

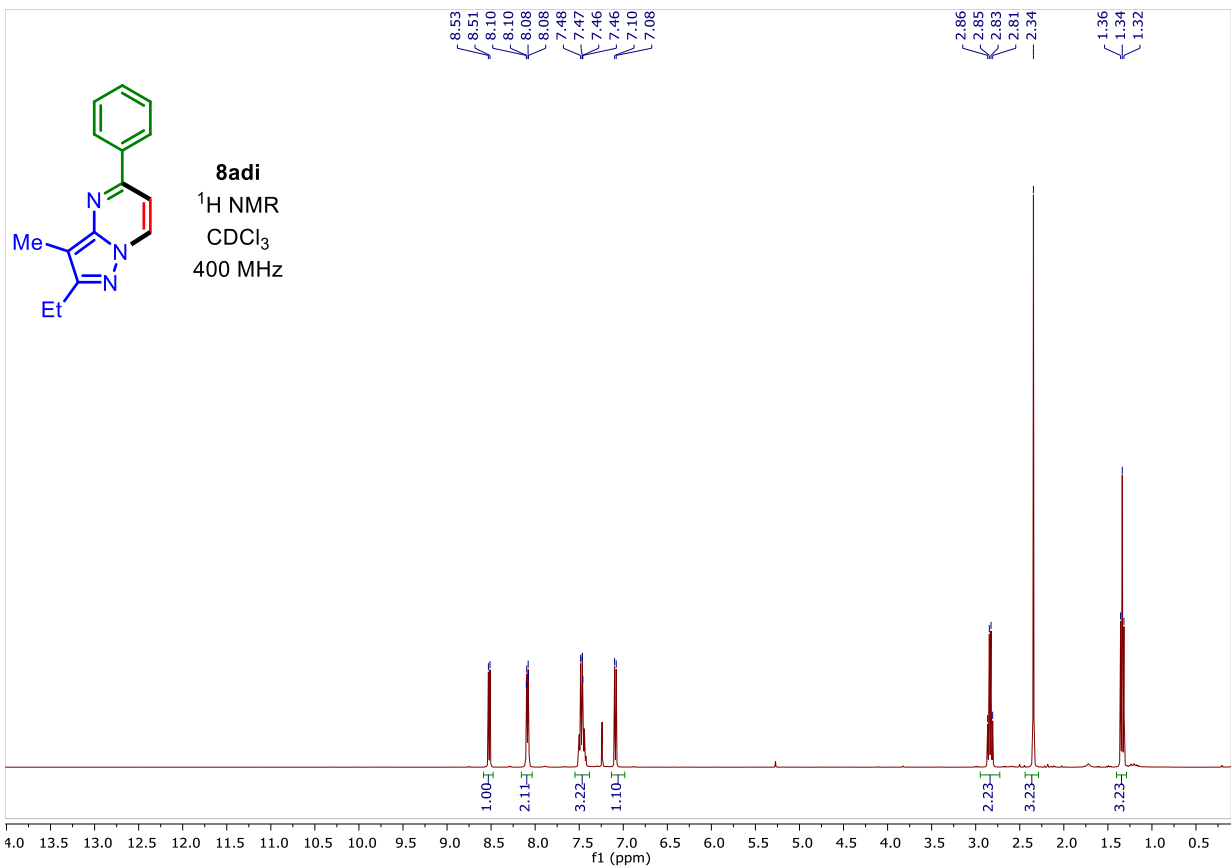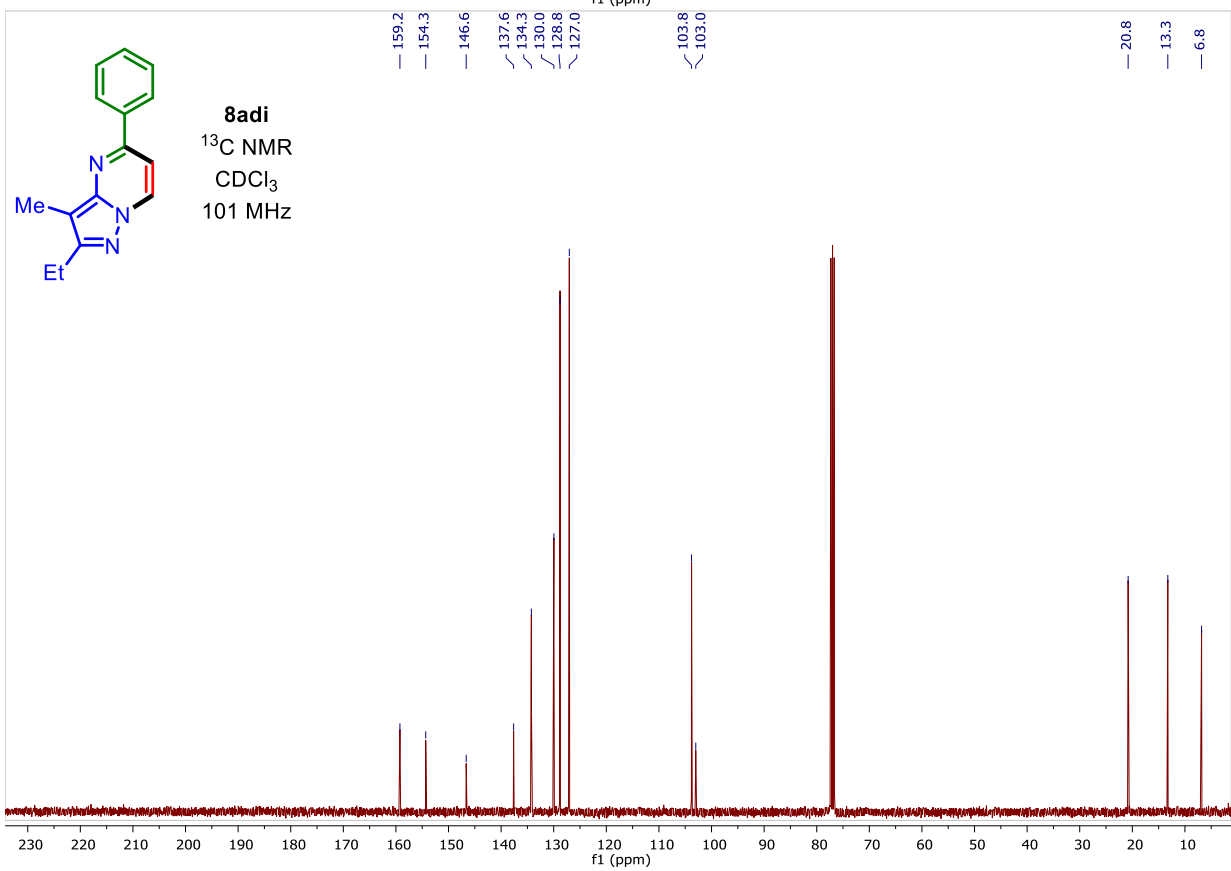

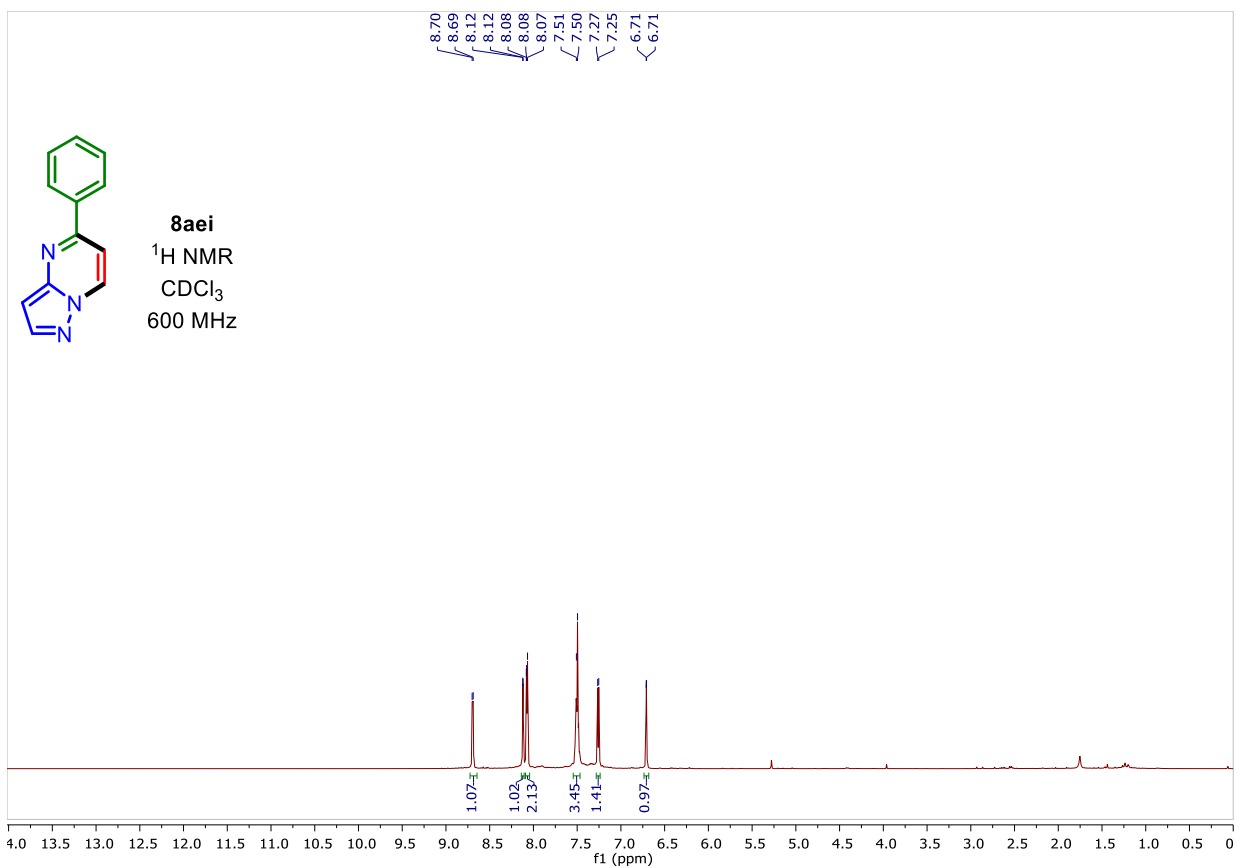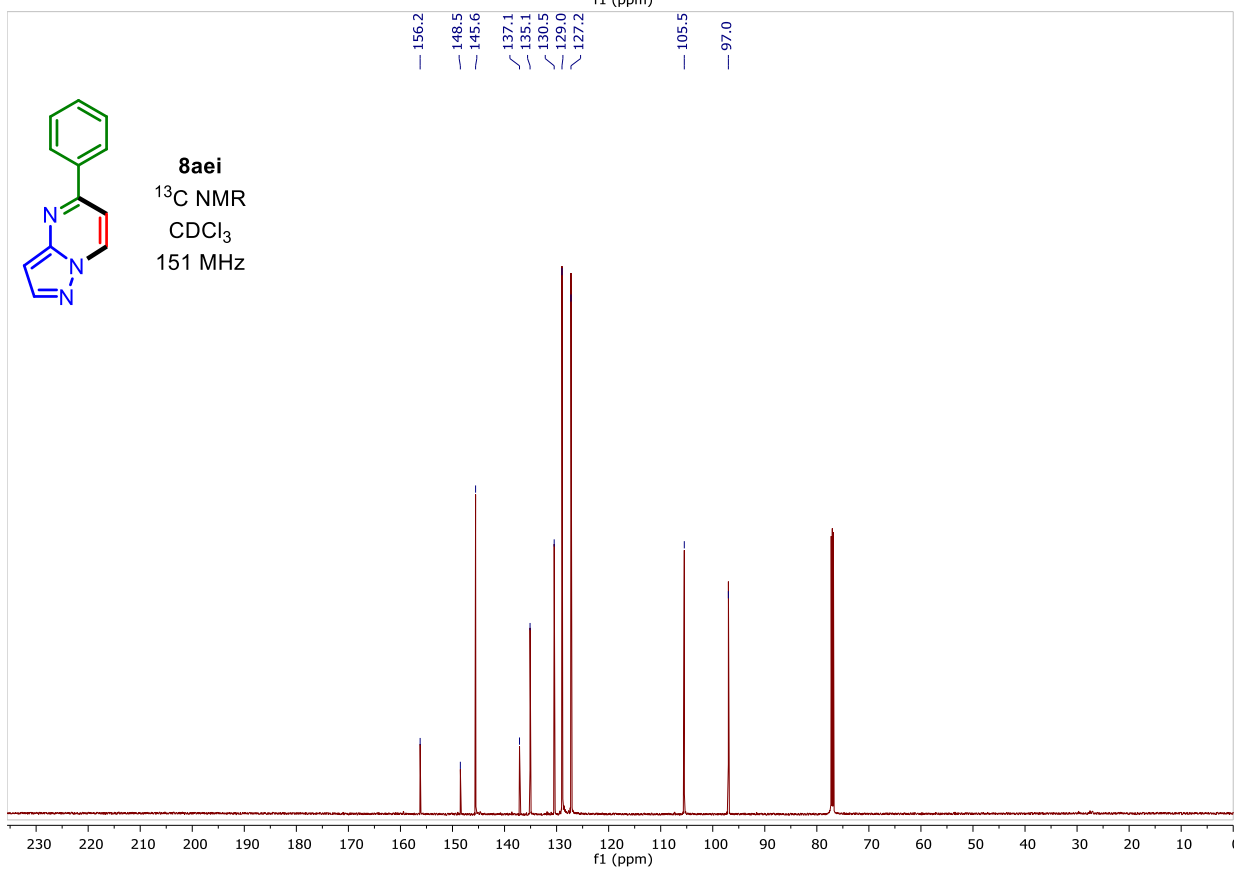

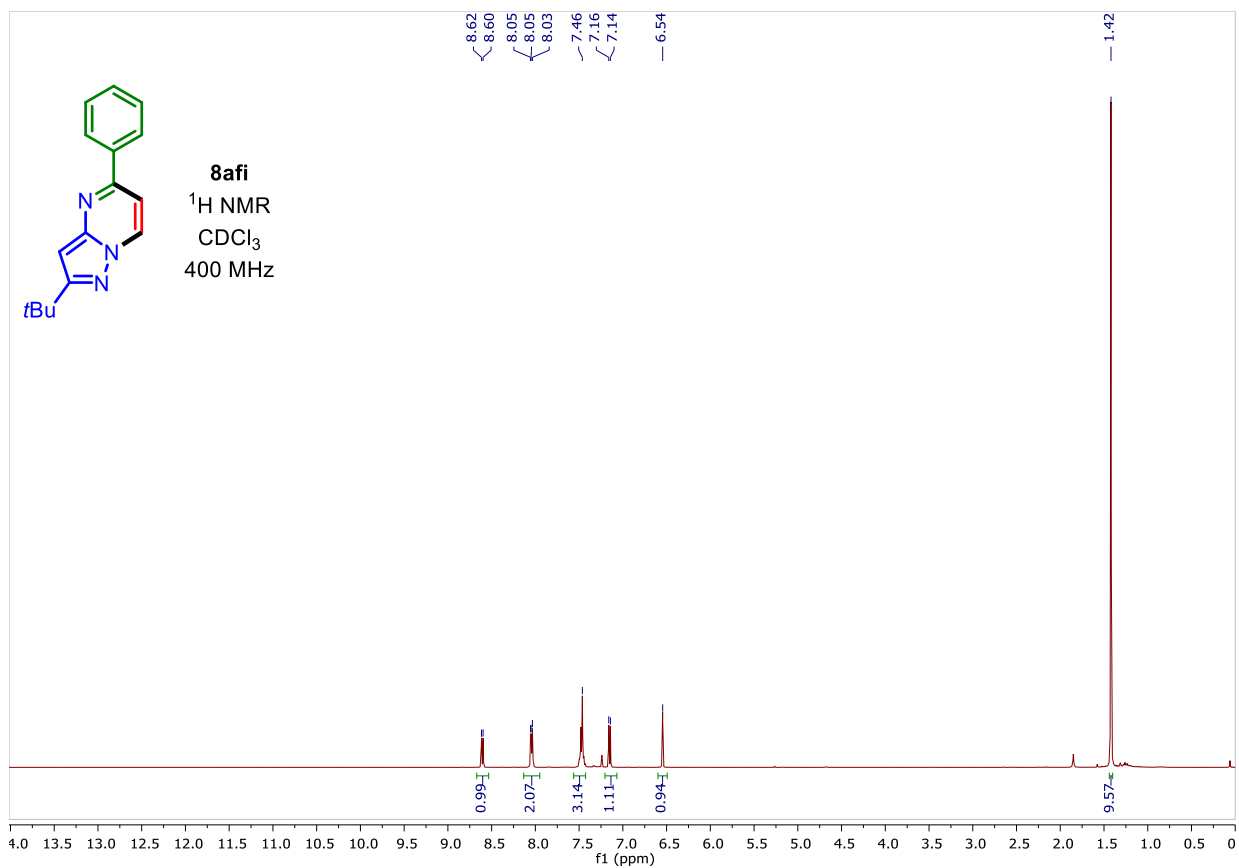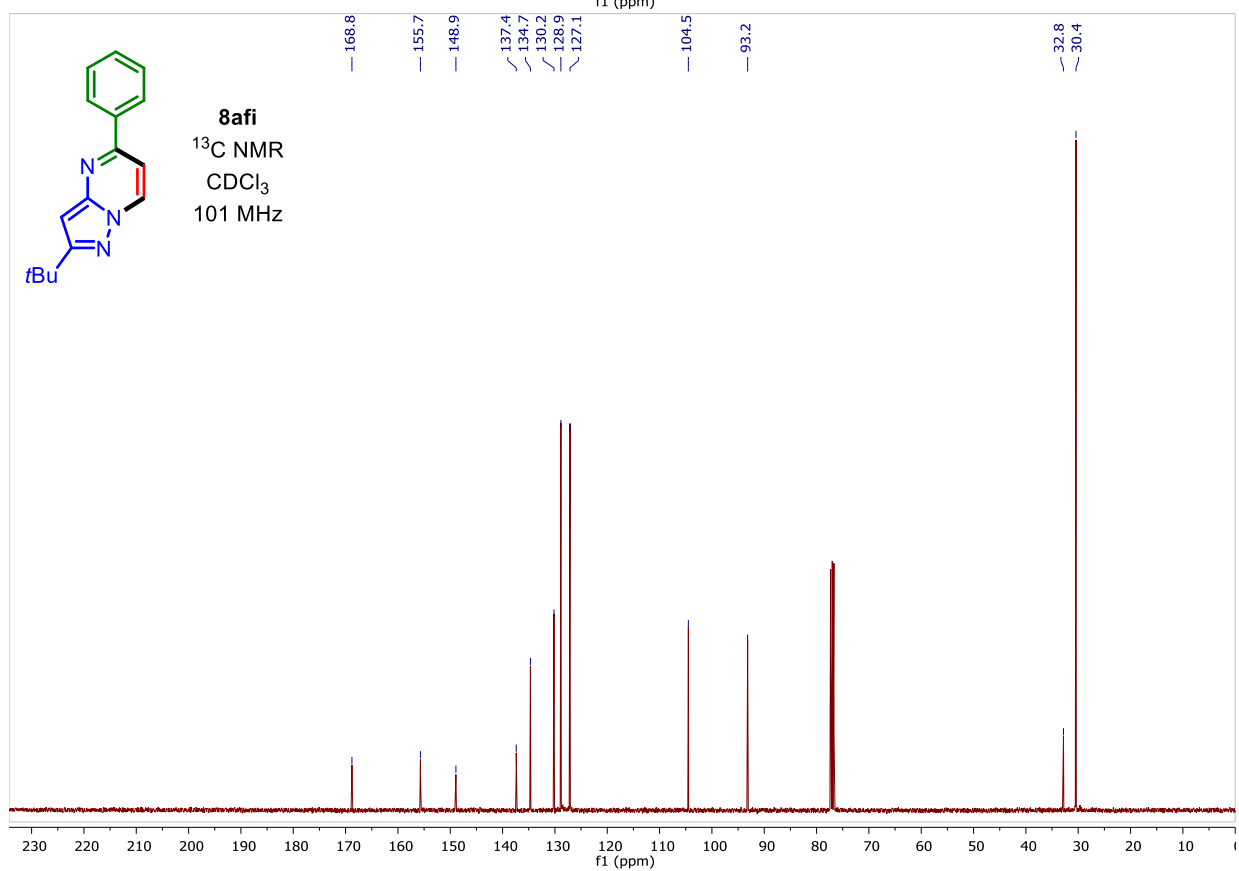

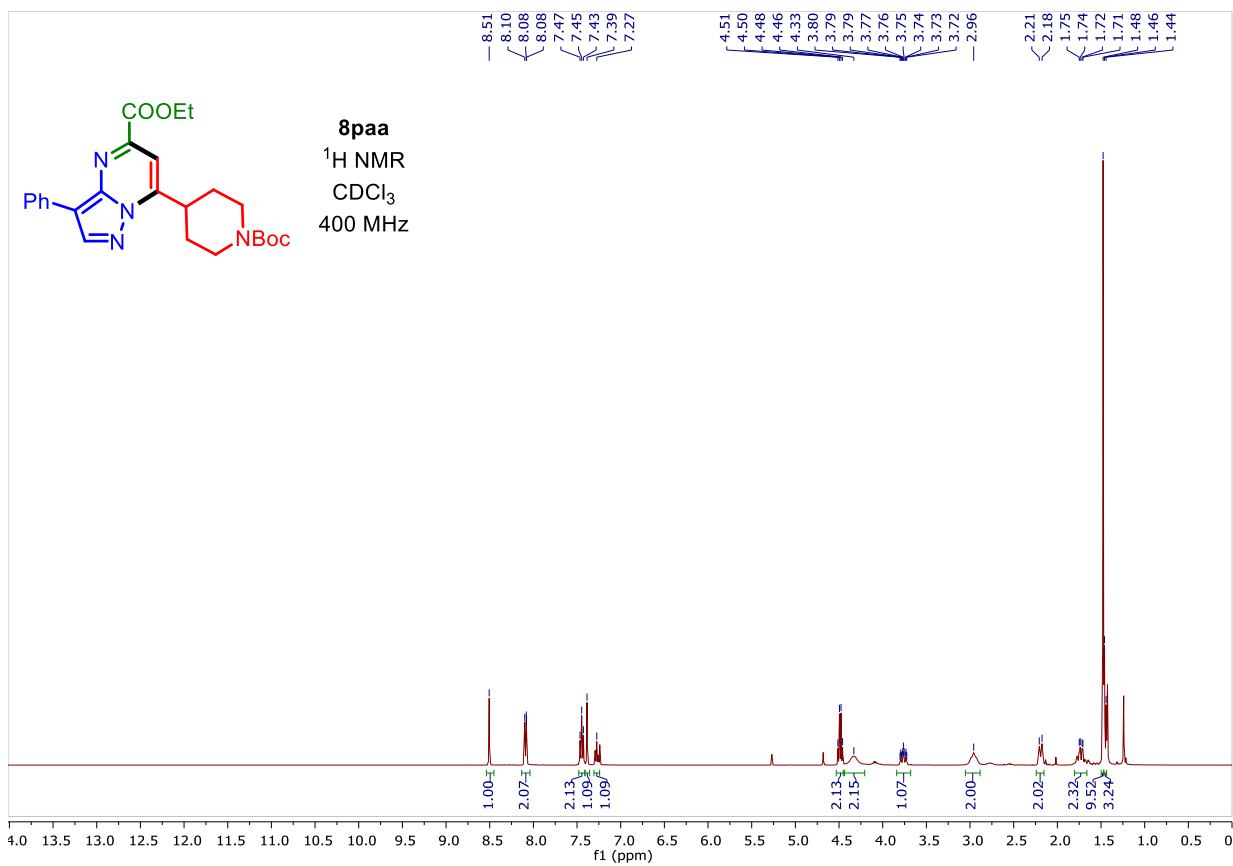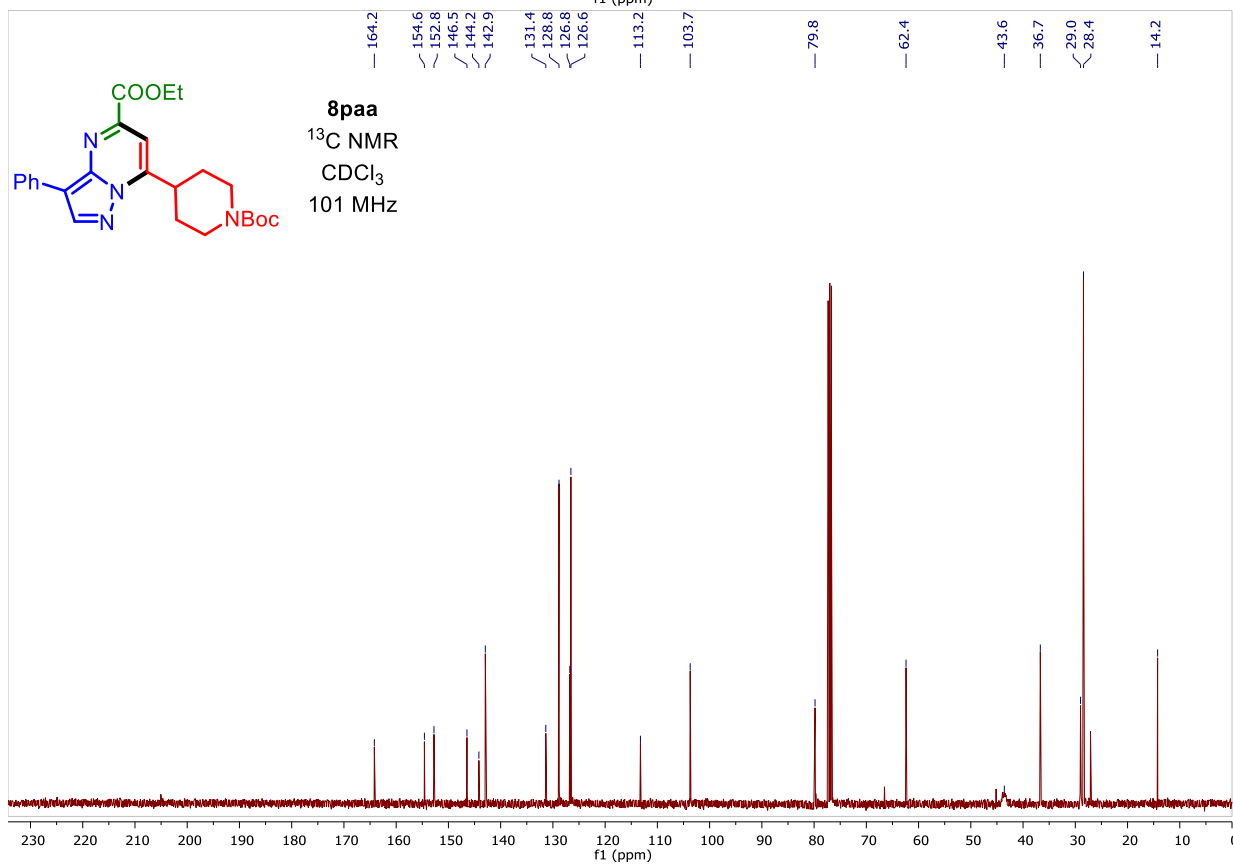

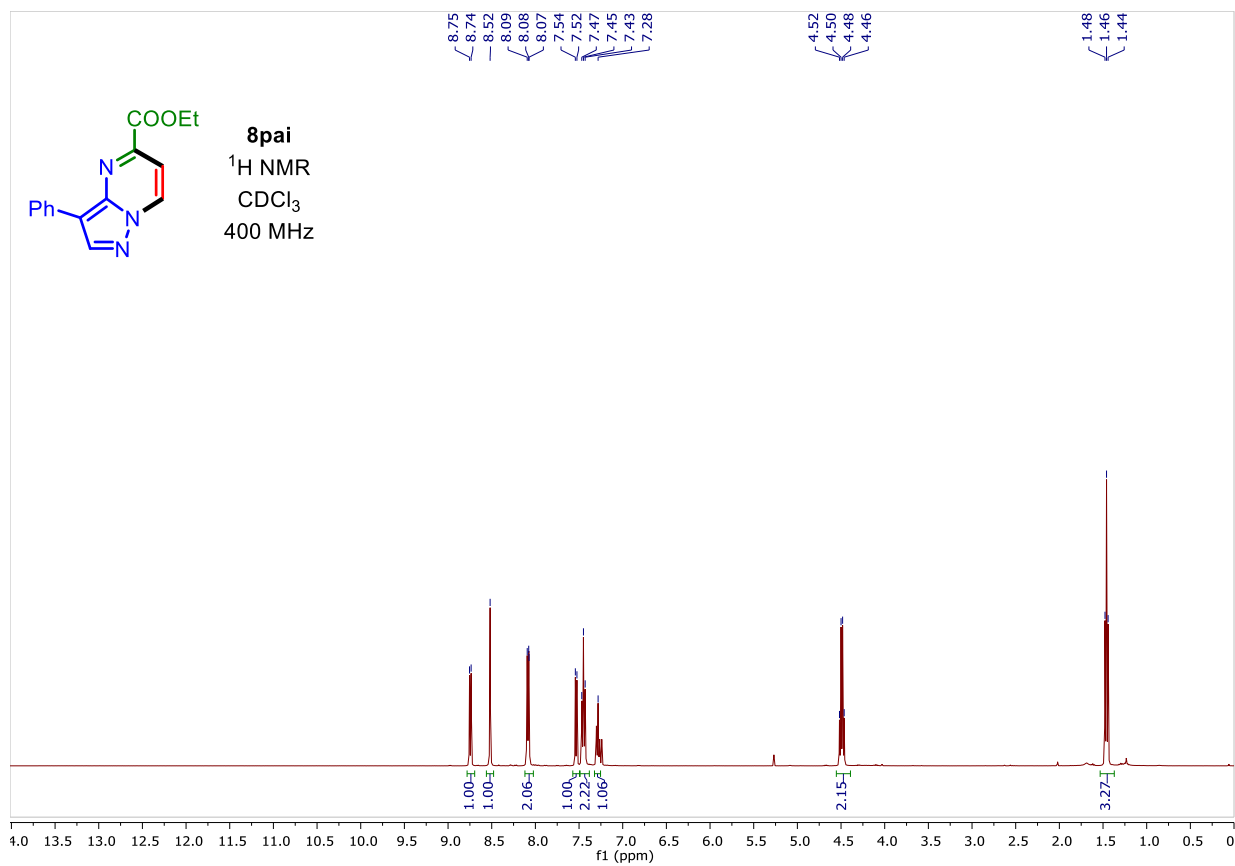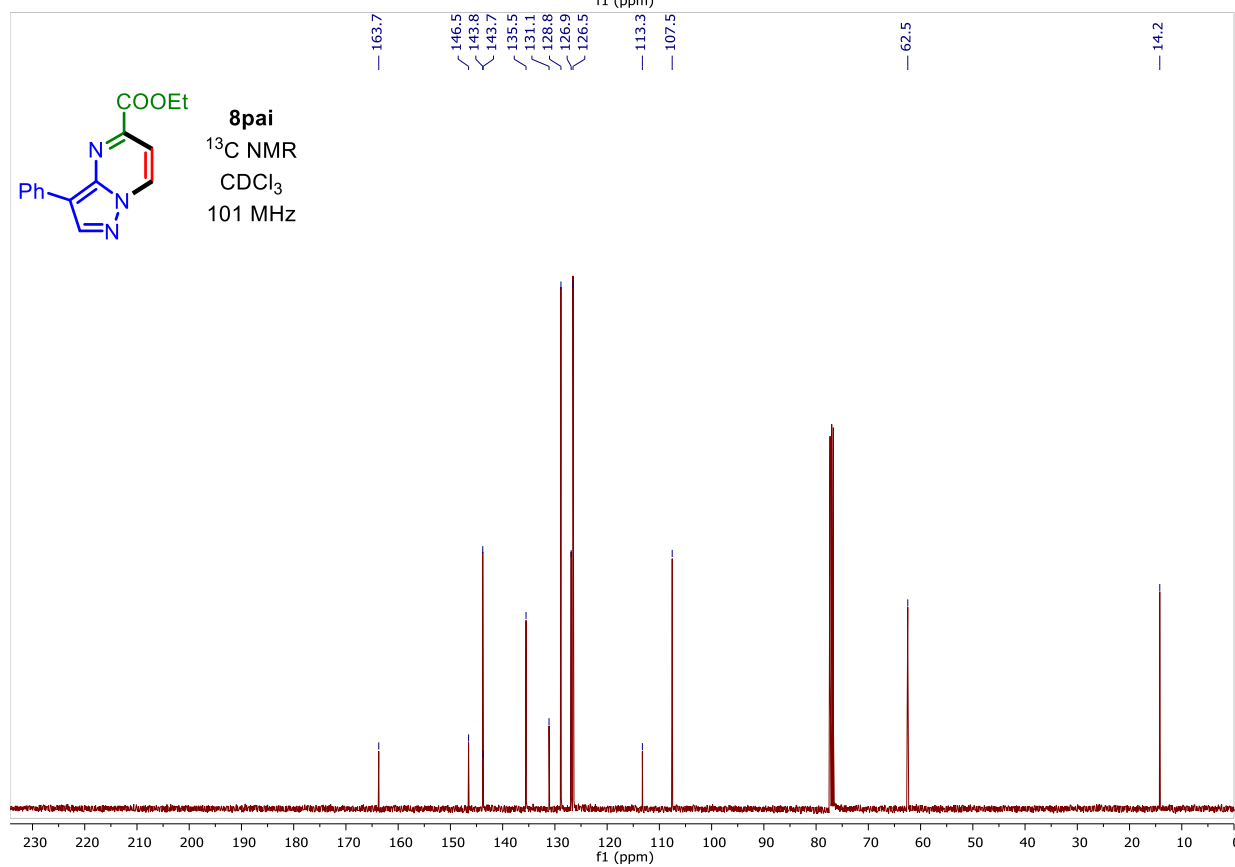

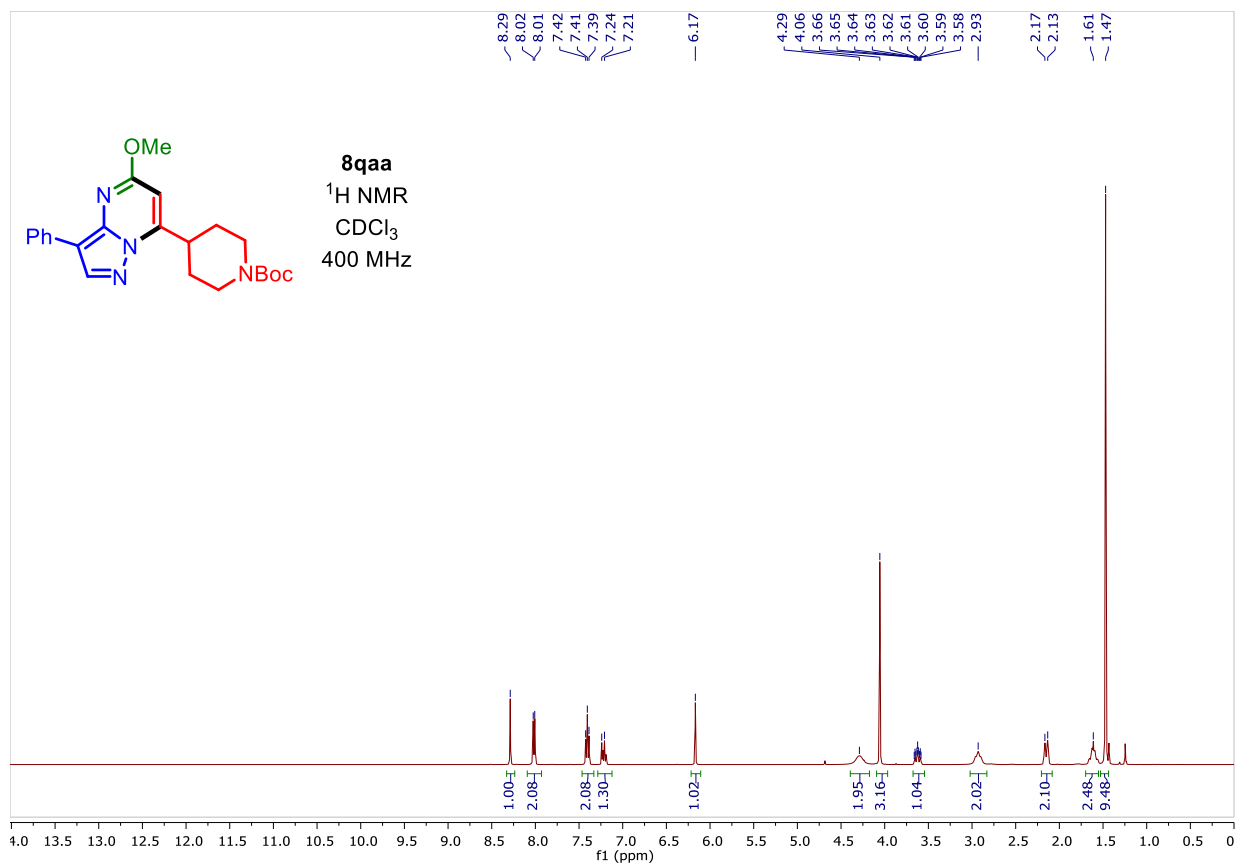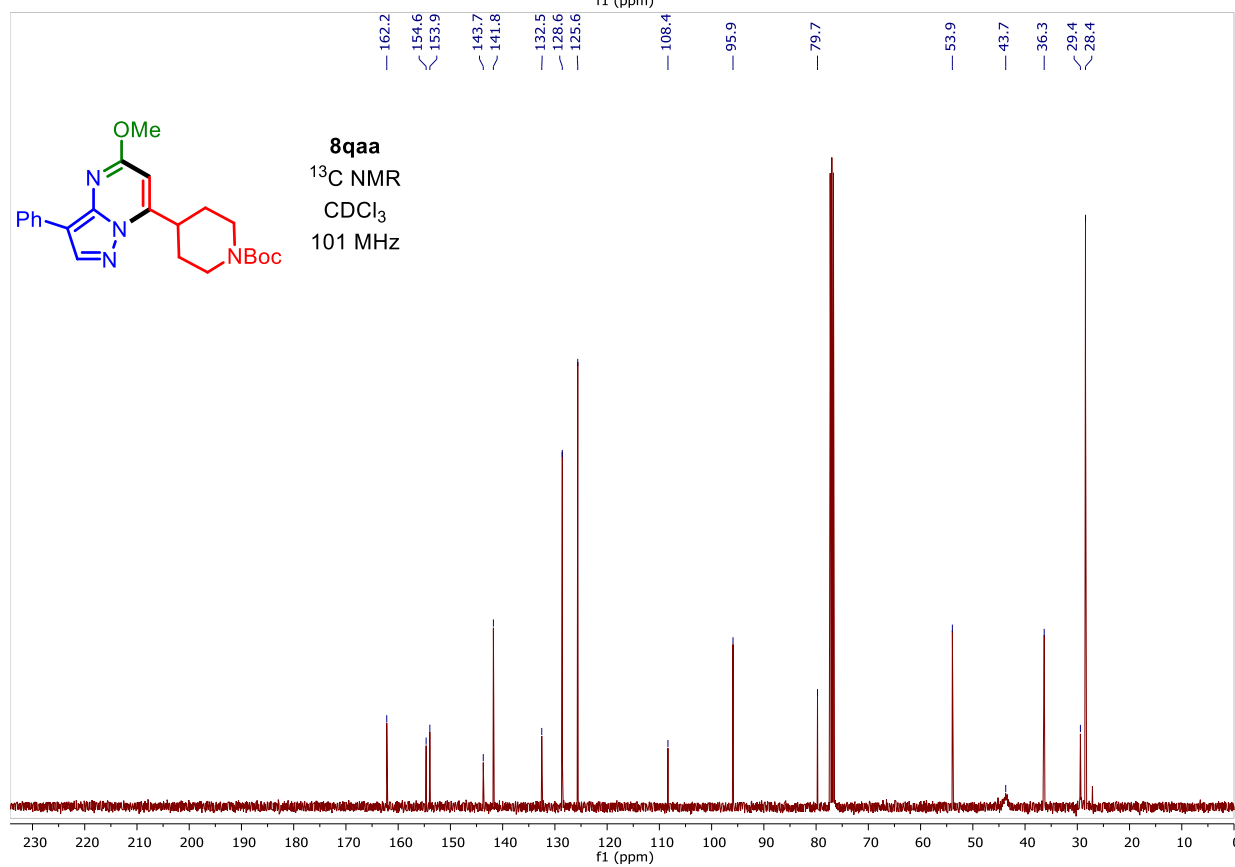



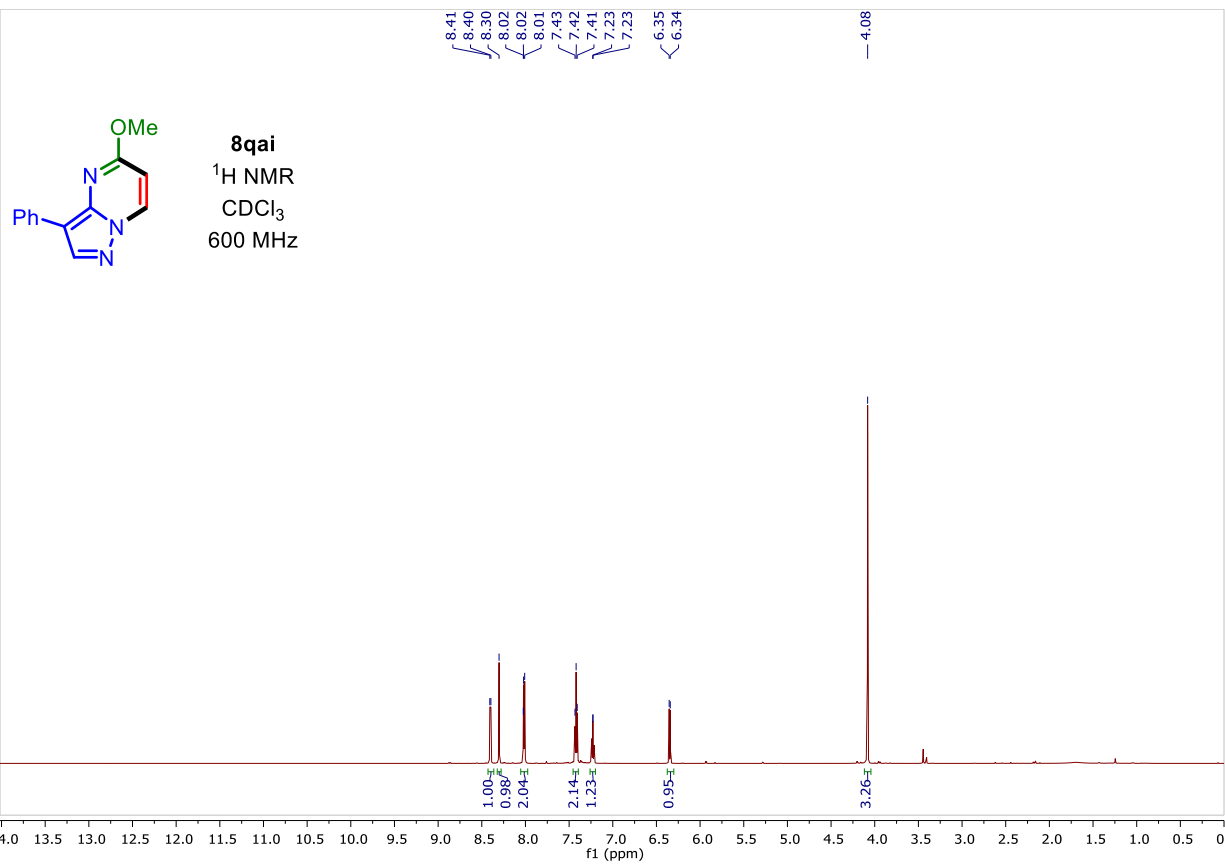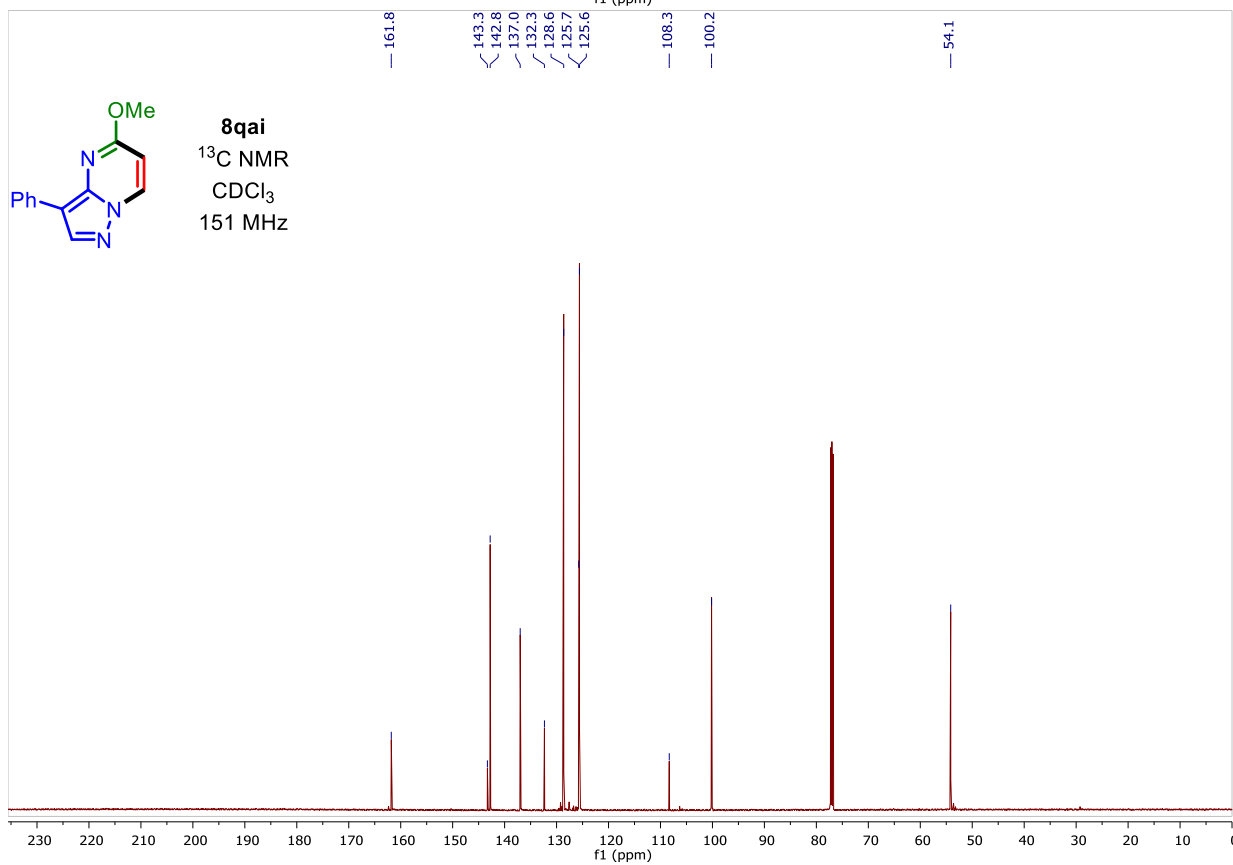

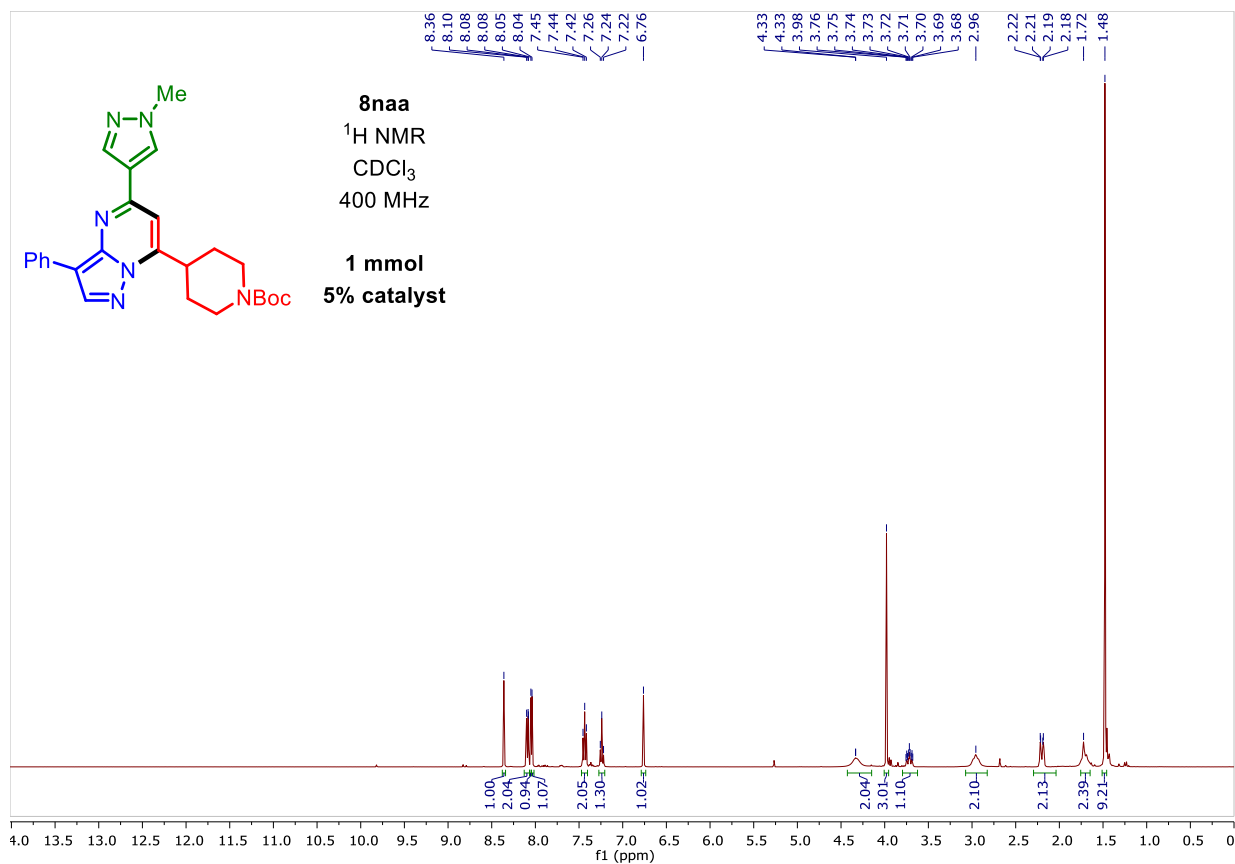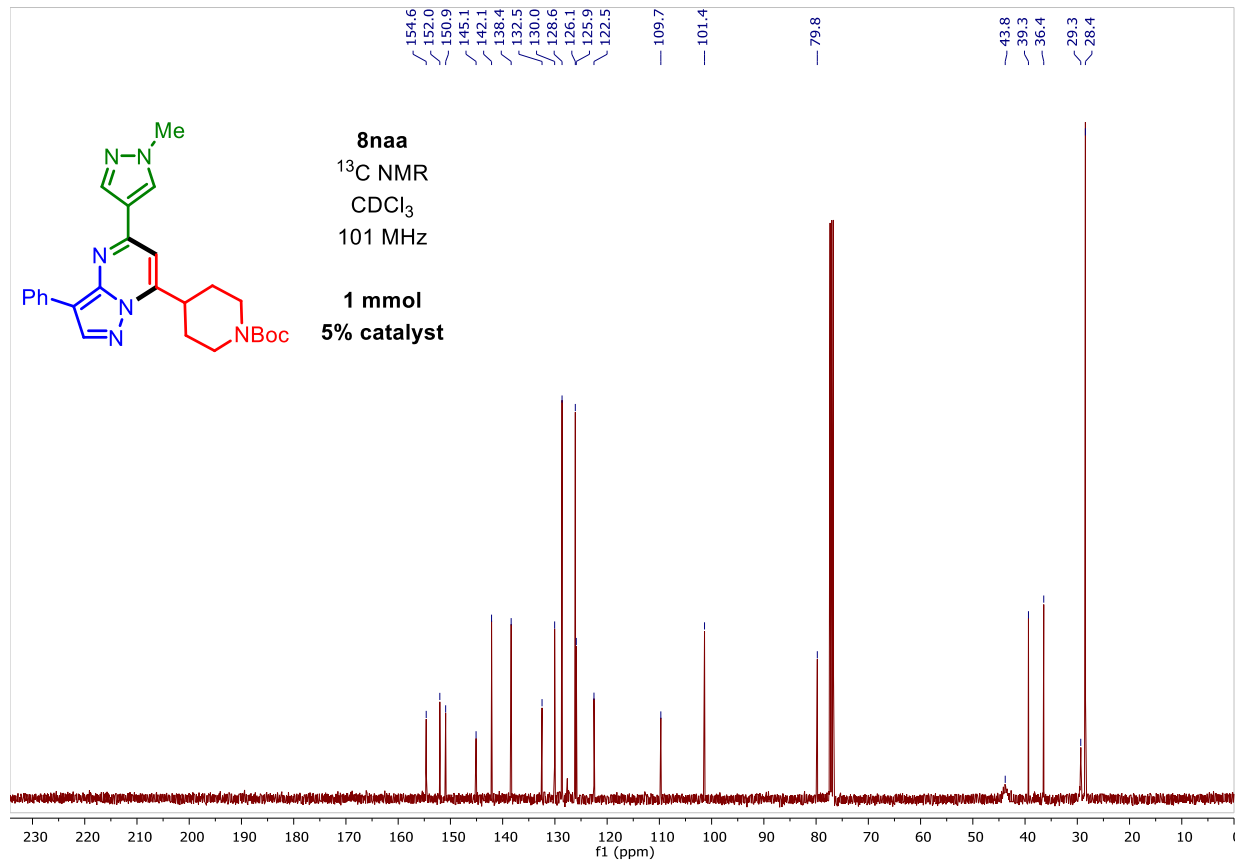

Supplement: NIHMS1004721-supplement-Supporting_Information.pdf [file NIHMS1004721-supplement-Supporting_Information.pdf]
